# Supplementary material for: Identification and analysis of seven effector protein families with different adaptive and evolutionary histories in plant-associated members of the Xanthomonadaceae
Source: PubMed Central journal article supplement (PMC5700972; doi:10.1038/s41598-017-16325-1), 2017-11-23
Supplement: 41598_2017_16325_MOESM1_ESM.pdf [file 41598_2017_16325_MOESM1_ESM.pdf]

## Supplementary Information

### **Identification and analysis of seven effector protein families with different adaptive and evolutionary histories in plant-associated members of the Xanthomonadaceae**

Renata de A. B. Assis, Lorraine Cristina Polloni, José S. L. Patané, Shalabh Thakur, Érica B. Felestrino, Julio Diaz-Caballero, Luciano Antonio Digiampietri, Luiz Ricardo Goulart, Nalvo F. Almeida, Rafael Nascimento, Abhaya M. Dandekar, Paulo A. Zaini, João C. Setubal, David S. Guttman, and Leandro Marcio Moreira\*

*Department of Biological Science, Institute of Exact and Biological Science, Federal University of Ouro Preto, Ouro Preto, MG, Brazil.*

Corresponding author`s e-mail [lmmorei@gmail.com](mailto:lmmorei@gmail.com); Tel +55 (31) 3559-1698; Fax +55 (31) 3559-1672

## CONTENTS

|                                                                                                                                                                                                                                                                                                                                                                                                               |    |
|---------------------------------------------------------------------------------------------------------------------------------------------------------------------------------------------------------------------------------------------------------------------------------------------------------------------------------------------------------------------------------------------------------------|----|
| Supplementary Methods - Additional computational analyses performed in this work.....                                                                                                                                                                                                                                                                                                                         | 4  |
| Supplementary Tables.....                                                                                                                                                                                                                                                                                                                                                                                     | 5  |
| <b>Table S1.</b> Genome features.....                                                                                                                                                                                                                                                                                                                                                                         | 5  |
| <b>Table S2.</b> Members of the seven protein families enriched in Xanthomonadaceae phytopathogens.....                                                                                                                                                                                                                                                                                                       | 12 |
| <b>Table S3.</b> Lipases found in <i>Xanthomonas</i> and the different functional parameters of each.                                                                                                                                                                                                                                                                                                         | 24 |
| <b>Table S4.</b> LipA canonical residues analysis in different genomes. ....                                                                                                                                                                                                                                                                                                                                  | 28 |
| <b>Table S5.</b> Validation of the phytopathogen core genome using tblastn. ....                                                                                                                                                                                                                                                                                                                              | 29 |
| Supplementary Figures .....                                                                                                                                                                                                                                                                                                                                                                                   | 36 |
| <b>Fig. S1.</b> Comparative genomics of the 69 selected strains. (a) General information about each strain classified into phytopathogens (green) and non-phytopathogens (brown). (b) Number of chromosome and plasmid proteins of respective strain. Numbers above the bars indicate number of plasmids in each strain. (c) Number of singletons per genome classified into three annotation categories..... | 36 |
| <b>Fig. S2.</b> Flowchart of analytical steps involved in this work. ....                                                                                                                                                                                                                                                                                                                                     | 37 |
| <b>Fig. S3.</b> Domain composition analysis of the seven proteins families using Xac306 as reference. ....                                                                                                                                                                                                                                                                                                    | 38 |
| <b>Fig. S4.</b> Shikimate pathway highlighting the possible reactions catalyzed by <i>CM-sec</i> and <i>CM-nonsec</i> in the metabolism of plants and phytopathogens.....                                                                                                                                                                                                                                     | 39 |
| <b>Fig. S5.</b> Signal peptide prediction of <i>CM-sec</i> and <i>CM-nonsec</i> .....                                                                                                                                                                                                                                                                                                                         | 40 |
| <b>Fig. S6.</b> Structural analysis of chorismate mutase. ....                                                                                                                                                                                                                                                                                                                                                | 41 |
| <b>Fig. S7.</b> Structural parameters analysis that denotes quality of <i>CM-sec</i> protein topology. ..                                                                                                                                                                                                                                                                                                     | 42 |
| <b>Fig. S8.</b> VirK structural analysis. ....                                                                                                                                                                                                                                                                                                                                                                | 43 |
| <b>Fig. S9.</b> Maximum likelihood phylogenetic tree of LipA. ....                                                                                                                                                                                                                                                                                                                                            | 44 |
| <b>Fig. S10.</b> Maximum likelihood phylogenetic tree of <i>CM-sec</i> .....                                                                                                                                                                                                                                                                                                                                  | 45 |
| <b>Fig. S11.</b> Maximum likelihood phylogenetic tree of <i>CM-nonsec</i> .....                                                                                                                                                                                                                                                                                                                               | 46 |
| <b>Fig. S12.</b> Maximum likelihood phylogenetic tree of NixE.....                                                                                                                                                                                                                                                                                                                                            | 47 |
| <b>Fig. S13.</b> Maximum likelihood phylogenetic tree of NixF. ....                                                                                                                                                                                                                                                                                                                                           | 48 |
| <b>Fig. S14.</b> Maximum likelihood phylogenetic tree of NixL. ....                                                                                                                                                                                                                                                                                                                                           | 49 |

**Fig. S15.** Maximum likelihood phylogenetic tree of FucA1. .... 50  
**Fig. S16.** Maximum likelihood phylogenetic tree of VirK. .... 51

## **Supplementary Methods - Additional computational analyses performed in this work**

### *Prediction of signal peptide, cellular localization, and domain composition*

To predict the presence, location and cleavage sites of signal peptides in all phytopathogen-specific proteins, we used SignalP<sup>79</sup>, Phobius<sup>80</sup>, and TatP<sup>81</sup> tools. In addition, we used PSORT<sup>82</sup> to verify cellular localization, and Kyoto Encyclopedia of Genes and Genomes – KEGG<sup>83</sup> and SMART<sup>84</sup> to determine the number of domains for each protein.

### *Prediction of genes in horizontal gene transfer (HGT) regions and protein-protein/protein-chemical interactions*

To predict the presence of the genes that code to the seven proteins families in HGT regions we used IslandViewer<sup>85</sup>. To predict the possible protein-protein or protein-chemical interactions we used STITCH 4.0<sup>86</sup>.

### *Prediction of transcriptional units of N-glycan degradation genes*

For prediction of transcriptional units, we used the program ProOpDB<sup>87</sup>.

### *Reannotation with assigned function*

The reannotation of hypothetical genes was made based on clusters of orthologous groups – COG<sup>88</sup>.

### *Secondary and three-dimensional structure prediction*

Secondary structure analysis was determined using the Jpred4 tool<sup>89</sup>. Topology prediction analyses were obtained from Swiss-model<sup>90</sup> and Phyre2<sup>91</sup>. The structural parameters were obtained from Phyre2<sup>91</sup>.

## Supplementary Tables

**Table S1.** Genome features.

| Strain                                                       | Abbreviation  | Niche                     | Genome Features |             |            |           |      |         |       | Hosts             | References                                                                                   |
|--------------------------------------------------------------|---------------|---------------------------|-----------------|-------------|------------|-----------|------|---------|-------|-------------------|----------------------------------------------------------------------------------------------|
|                                                              |               |                           | Type            | Ref_Sec     | INSDC      | Size (Mb) | GC%  | Protein | Genes |                   |                                                                                              |
| <i>X.axonopodis</i> pv. <i>citri</i> strain 306              | Xac306        | Mesophyllic phytopathogen | Chr             | NC_003919.1 | AE008923.1 | 5.18      | 64.8 | 4,232   | 4,406 | Citrus            | Nature. 2002 May 23;417(6887):459-63. PMID: 12024217 Zhang et al 2015                        |
|                                                              |               |                           | pXac33          | NC_003921.3 | AE008924.1 | 0.0337    | 61.9 | 34      | 36    |                   |                                                                                              |
|                                                              |               |                           | pXac64          | NC_003922.1 | AE008925.1 | 0.06492   | 61.4 | 61      | 65    |                   |                                                                                              |
| <i>X.axonopodis</i> strain 29-1                              | XacA29        | Mesophyllic phytopathogen | Chr             | NC_020800.1 | CP004399.1 | 5.15      | 64.8 | 4,136   | 4,393 | Citrus            | Direct Submission / Unpublished Zhang et al 2015                                             |
|                                                              |               |                           | pXAC64          | NC_020797.1 | CP004400.1 | 0.064118  | 61.6 | 59      | 62    |                   |                                                                                              |
|                                                              |               |                           | pXAC47          | NC_020798.1 | CP004401.1 | 0.047151  | 61.8 | 50      | 53    |                   |                                                                                              |
|                                                              |               |                           | pXAC33          | NC_020801.1 | CP004402.1 | 0.031801  | 61.9 | 33      | 34    |                   |                                                                                              |
| <i>X.axonopodis</i> citri subsp. <i>citri</i> strain Aw12879 | XacAw12879    | Mesophyllic phytopathogen | Chr             | NC_020815.1 | CP003778.1 | 5.32      | 64.7 | 4,343   | 4,559 | Citrus            | Genome Announc. 2013 May 16;1(3). PMID: 23682143 Zhang et al 2015                            |
|                                                              |               |                           | pXcaw19         | NC_020816.1 | CP003779.1 | 0.018869  | 63.1 | 16      | 16    |                   |                                                                                              |
|                                                              |               |                           | pXcaw58         | NC_020817.1 | CP003780.1 | 0.058317  | 61.9 | 55      | 62    |                   |                                                                                              |
| <i>X.campestris</i> pv. <i>vesicatoria</i> strain 85-10      | Xcv8510       | Mesophyllic phytopathogen | Chr             | NC_007508.1 | AM039952.1 | 5.18      | 64.7 | 4,211   | 4,442 | Pepper and tomato | J Bacteriol. 2005 Nov;187(21):7254-66. PMID: 16237009 Thieme et al 2005                      |
|                                                              |               |                           | pXCV2           | NC_007504.1 | AM039948.1 | 0.001852  | 56.6 | 2       | 2     |                   |                                                                                              |
|                                                              |               |                           | pXCV19          | NC_007505.1 | AM039949.1 | 0.019146  | 59.8 | 22      | 23    |                   |                                                                                              |
|                                                              |               |                           | pXCV38          | NC_007506.1 | AM039950.1 | 0.038116  | 60.7 | 48      | 48    |                   |                                                                                              |
|                                                              |               |                           | pXCV183         | NC_007507.1 | AM039951.1 | 0.182572  | 60.5 | 175     | 178   |                   |                                                                                              |
| <i>X.axonopodis</i> pv. <i>citrumelo</i> strain F1           | XalfaF1       | Mesophyllic phytopathogen | Chr             | NC_016010.1 | CP002914.1 | 4.97      | 64.9 | 4,020   | 4,188 | Brassica          | J Bacteriol. 2011 Nov;193(22):6342-57. Epub 2011 Sep 9. PMID: 21908674 Zhang et al 2015      |
| <i>X.oryzae</i> pv. <i>oryzicola</i> strain BLS256           | XooBLS256     | Mesophyllic phytopathogen | Chr             | NC_017267.2 | CP003057.2 | 4.83      | 64.1 | 3,755   | 4,161 | Oryza             | J Bacteriol. 2011 Oct;193(19):5450-64. Epub 2011 Jul 22. PMID: 21784931 Bogdanove et al 2011 |
| <i>X.oryzae</i> pv. <i>oryzae</i> strain PXO99A              | XoryPXO99A    | Vascular phytopathogen    | Chr             | NC_010717.2 | CP000967.2 | 5.24      | 63.6 | 4,375   | 4,798 | Oryza             | BMC Genomics. 2008 May 1;9:204. PMID: 18452608 Qian et al 2005                               |
| <i>X.oryzae</i> pv. <i>oryzae</i> strain KACC10331           | XoryKACC10331 | Vascular phytopathogen    | Chr             | NC_006834.1 | AE013598.1 | 4.94      | 63.7 | 4,055   | 4,568 | Oryza             | Nucleic Acids Res. 2005 Jan 26;33(2):577-86. PMID: 15673718 Qian et al 2005                  |

|                                                             |                |                                |          |             |            |          |      |       |       |                         |                                                                                              |
|-------------------------------------------------------------|----------------|--------------------------------|----------|-------------|------------|----------|------|-------|-------|-------------------------|----------------------------------------------------------------------------------------------|
| <i>X.oryzae</i> pv. <i>oryzae</i> strain MAFF 311018        | XoryMAFF311018 | Vascular phytopathogen         | Chr      | NC_007705.1 | AP008229.1 | 4.94     | 63.7 | 4,183 | 4,575 | Oryza                   | Direct Submission / Unpublished Qian et al 2005                                              |
| <i>X.campestris</i> pv. <i>raphani</i> strain 756C          | Xcr756C        | Mesophyllic phytopathogen      | Chr      | NC_017271.1 | CP002789.1 | 4.94     | 65.3 | 4,007 | 4,140 | Brassica and Solanaceae | J Bacteriol. 2011 Oct;193(19):5450-64. Epub 2011 Jul 22. PMID: 21784931 Bogdanove et al 2011 |
| <i>X.campestris</i> pv. <i>campestris</i> strain 8004       | Xcam8004       | Vascular phytopathogen         | Chr      | NC_007086.1 | CP000050.1 | 5.15     | 65   | 4,248 | 4,381 | Brassica                | Genome Res. 2005 Jun;15(6):757-67. Epub 2005 May 17. PMID: 15899963 Qian et al 2005          |
| <i>X.campestris</i> pv. <i>campestris</i> strain ATCC 33913 | XcamATCC33913  | Vascular phytopathogen         | Chr      | NC_003902.1 | AE008922.1 | 5.08     | 65.1 | 4,179 | 4,240 | Brassica                | Nature. 2002 May 23;417(6887):459-63. PMID: 12024217 Qian et al 2005                         |
| <i>X.fastidiosa</i> strain 9a5c                             | Xyf9a5c        | Xylem-limited phytopathogen    | Chr      | NC_002488.3 | AE003849.1 | 2.68     | 52.7 | 2,247 | 2,420 | Citrus                  | Nature. 2000 Jul 13;406(6792):151-9. PMID: 10910347 Simpson et al 2000                       |
|                                                             |                |                                | pXF1.3   | NC_002489.3 | AE003850.3 | 0.001286 | 55.6 | 1     | 1     |                         |                                                                                              |
|                                                             |                |                                | pXF51    | NC_002490.1 | AE003851.1 | 0.051158 | 49.6 | 62    | 66    |                         |                                                                                              |
| <i>X.fastidiosa</i> strain M12                              | XyfM12         | Xylem-limited phytopathogen    | Chr      | NC_010513.1 | CP000941.1 | 2.48     | 51.9 | 2,054 | 2,187 | Almond                  | J Bacteriol. 2010 Sep;192(17):4534. Epub 2010 Jul 2. PMID: 20601474 Chen et al 2010          |
| <i>X.fastidiosa</i> strain GB514                            | XyfGB514       | Xylem-limited phytopathogen    | Chr      | NC_017562.1 | CP002165.1 | 2.49     | 51.8 | 1,957 | 2,172 | Grape                   | Direct Submission / Unpublished Schreiber et al 2010                                         |
|                                                             |                |                                | unnamed  | NC_017561.1 | CP002166.1 | 0.02618  | 49.3 | 35    | 37    |                         |                                                                                              |
| <i>X.fastidiosa</i> strain M23                              | XyfM23         | Xylem-limited phytopathogen    | Chr      | NC_010577.1 | CP001011.1 | 2.54     | 51.8 | 2,152 | 2,242 | Almond                  | J Bacteriol. 2010 Sep;192(17):4534. Epub 2010 Jul 2. PMID: 20601474 Chen et al 2010          |
|                                                             |                |                                | pXFAS01  | NC_010579.1 | CP001012.1 | 0.038297 | 49.2 | 41    | 42    |                         |                                                                                              |
| <i>X.fastidiosa</i> strain Temecula1                        | XyfTemecula1   | Xylem-limited phytopathogen    | Chr      | NC_004556.1 | AE009442.1 | 2.52     | 51.8 | 2,156 | 2,247 | Grapevine               | J Bacteriol. 2003 Feb;185(3):1018-26. PMID: 12533478 Van Sluys et al 2003                    |
|                                                             |                |                                | pXFDP1.3 | NC_004554.1 | AE009443.1 | 0.001346 | 53.8 | 1     | 1     |                         |                                                                                              |
| <i>X.albilineans</i> strain GPE PC73                        | XalbGPEPC73    | Xylem-limited phytopathogen    | Chr      | NC_013722.1 | FP565176.1 | 3.77     | 63   | 2,946 | 3,104 | Sugar cane              | BMC Genomics. 2009 Dec 17;10:616. PMID: 20017926 Pieretti et al 2009                         |
|                                                             |                |                                | plasmIII | NC_017555.1 | FP340277.1 | 0.027212 | 57.3 | 31    | 31    |                         |                                                                                              |
|                                                             |                |                                | plasmII  | NC_017556.1 | FP340278.1 | 0.031555 | 60   | 34    | 35    |                         |                                                                                              |
|                                                             |                |                                | plasmI   | NC_017557.1 | FP340279.1 | 0.024837 | 58.4 | 27    | 28    |                         |                                                                                              |
| <i>P.suwonensis</i> strain 11-1                             | Psuw111        | Compost feedstock-adapted      | Chr      | NC_014924.1 | CP002446.1 | 3.42     | 70.2 | 3,023 | 3,109 | Compost feedstock       | Direct Submission / Unpublished Choi et al 2013                                              |
| <i>P.spadix</i> strain BD-a59                               | PspaBDa59      | Gasoline-contaminated sediment | Chr      | NC_016147.2 | CP003093.2 | 3.45     | 67.7 | 2,994 | 3,104 | Soil                    | J Bacteriol. 2012 Jan;194(2):544. PMID: 22207748                                             |
| <i>S.maltophilia</i> strain R551-3                          | SmalR5513      | Endophytic                     | Chr      | NC_011071.1 | CP001111.1 | 4.57     | 66.3 | 4,011 | 4,112 | Endophyte               | Direct Submission / Unpublished Alavi et al 2014                                             |

|                                                  |                   |                                        |         |               |            |          |      |       |       |                |                                                                                                                                                       |
|--------------------------------------------------|-------------------|----------------------------------------|---------|---------------|------------|----------|------|-------|-------|----------------|-------------------------------------------------------------------------------------------------------------------------------------------------------|
| <i>S.maltophilia</i> strain K279a                | SmalK279a         | Opportunistic pathogen                 | Chr     | NC_010943.1   | AM743169.1 | 4.85     | 66.3 | 4,328 | 4,458 | Human pathogen | Genome Biol. 2008 Apr 17;9(4):R74. PMID: 18419807                                                                                                     |
| <i>S.maltophilia</i> strain JV3                  | SmalJV3           | Rhizosphere-colonizing                 | Chr     | NC_015947.1   | CP002986.1 | 4.54     | 66.9 | 4,022 | 4,128 | Rhizosphere    | Direct Submission / Unpublished <a href="https://www.ncbi.nlm.nih.gov/nucleotide/NC_015947.1">https://www.ncbi.nlm.nih.gov/nucleotide/NC_015947.1</a> |
| <i>S.maltophilia</i> strain D457                 | SmalD457          | Opportunistic pathogen                 | Chr     | NC_017671.1   | HE798556.1 | 4.77     | 66.8 | 4,220 | 4,381 | Human pathogen | J Bacteriol. 2012 Jul;194(13):3563-4. PMID: 22689246                                                                                                  |
| <i>P.suwonensis</i> strain J1                    | PsuwJ1            | Leafy wood soil                        | Chr     | NZ_CP011144.1 | CP011144.1 | 3.89     | 70.2 | 3,136 | 3,222 | Soil           | Genome Announc. 2015 Jun 11;3(3). PMID: 26067962                                                                                                      |
| <i>S.acidaminiphila</i> strain ZAC14D2_NAIMI4_2  | StenoacidaZAC14D2 | Superficial sediment of polluted river | Chr     | NZ_CP012900.1 | CP012900.1 | 4.14     | 68.5 | 3,513 | 3,656 | River sediment | Genome Announc. 2015 Dec 10;3(6). PMID: 26659678                                                                                                      |
| <i>S.maltophilia</i> strain ISMM2                | StenomaltoISMMS2  | Opportunistic pathogen                 | Chr     | NZ_CP011305.1 | CP011305.1 | 4.51     | 66.4 | 3,964 | 4,076 | Human pathogen | Antimicrob Agents Chemother. 2015 Nov;59(11):7117-20. Epub 2015 Aug 31. PMID: 26324280                                                                |
| <i>S.maltophilia</i> strain ISMMS2R              | StenomaltoISMMS2R | Opportunistic pathogen                 | Chr     | NZ_CP011306.1 | CP011306.1 | 4.51     | 66.4 | 3,964 | 4,076 | Human pathogen | Antimicrob Agents Chemother. 2015 Nov;59(11):7117-20. Epub 2015 Aug 31. PMID: 26324280                                                                |
| <i>S.maltophilia</i> strain ISMMS3               | StenomaltoISMMS3  | Opportunistic pathogen                 | Chr     | NZ_CP011010.1 | CP011010.1 | 4.8      | 66.7 | 4,217 | 4,335 | Human pathogen | Antimicrob Agents Chemother. 2015 Nov;59(11):7117-20. Epub 2015 Aug 31. PMID: 26324280                                                                |
| <i>X.axonopodis</i> pv. <i>citri</i> strain 5208 | Xac5208           | Mesophyllic phytopathogen              | Chr     | NZ_CP009028.1 | CP009028.1 | 5.18     | 64.8 | 4,233 | 4,407 | Citrus         | ISME J. 2015 Oct;9(10):2128-38. Epub 2015 Feb 17. PMID: 25689023 Zhang et al 2015                                                                     |
|                                                  |                   |                                        | pXAC33  | NZ_CP009026.1 | CP009026.1 | 0.028753 | 61.7 | 29    | 31    |                |                                                                                                                                                       |
|                                                  |                   |                                        | pXAC64  | NZ_CP009027.1 | CP009027.1 | 0.06492  | 61.4 | 61    | 65    |                |                                                                                                                                                       |
| <i>X.citri</i> subsp. <i>citri</i> strain A306   | XacA306           | Mesophyllic phytopathogen              | Chr     | NZ_CP006857.1 | CP006857.1 | 5.18     | 64.8 | 4,228 | 4,405 | Citrus         | Direct Submission / Unpublished Zhang et al 2015                                                                                                      |
|                                                  |                   |                                        | pXAC33  | NZ_CP006855.1 | CP006855.1 | 0.033703 | 61.9 | 34    | 36    |                |                                                                                                                                                       |
|                                                  |                   |                                        | pXAC64  | NZ_CP006856.1 | CP006856.1 | 0.06492  | 61.4 | 61    | 65    |                |                                                                                                                                                       |
| <i>X.axonopodis</i> pv. <i>citri</i> strain AW13 | XacAW13           | Mesophyllic phytopathogen              | Chr     | NZ_CP009031.1 | CP009031.1 | 5.32     | 64.7 | 4,354 | 4,558 | Citrus         | ISME J. 2015 Oct;9(10):2128-38. Epub 2015 Feb 17. PMID: 25689023 Zhang et al 2015                                                                     |
|                                                  |                   |                                        | pXCAW19 | NZ_CP009029.1 | CP009029.1 | 0.018869 | 63.1 | 16    | 16    |                |                                                                                                                                                       |
|                                                  |                   |                                        | pXCAW58 | NZ_CP009030.1 | CP009030.1 | 0.058317 | 61.9 | 56    | 63    |                |                                                                                                                                                       |
| <i>X.axonopodis</i> pv. <i>citri</i> strain AW14 | XacAW14           | Mesophyllic phytopathogen              | Chr     | NZ_CP009034.1 | CP009034.1 | 5.32     | 64.7 | 4,350 | 4,558 | Citrus         | ISME J. 2015 Oct;9(10):2128-38. Epub 2015 Feb 17. PMID: 25689023 Zhang et al 2015                                                                     |
|                                                  |                   |                                        | pXCAW19 | NZ_CP009032.1 | CP009032.1 | 0.018869 | 63.1 | 16    | 16    |                |                                                                                                                                                       |
|                                                  |                   |                                        | pXCAW58 | NZ_CP009033.1 | CP009033.1 | 0.058317 | 61.9 | 56    | 63    |                |                                                                                                                                                       |

|                                                     |         |                              |         |                   |            |          |      |       |       |        |                                                                                         |
|-----------------------------------------------------|---------|------------------------------|---------|-------------------|------------|----------|------|-------|-------|--------|-----------------------------------------------------------------------------------------|
| <i>X.axonopodis</i> pv. <i>citri</i><br>strain AW15 | XacAW15 | Mesophyllic<br>phytopathogen | Chr     | NZ_CP009037.<br>1 | CP009037.1 | 5.32     | 64.7 | 4,355 | 4,559 | Citrus | ISME J. 2015 Oct;9(10):2128-38. Epub<br>2015 Feb 17. PMID: 25689023<br>Zhang et al 2015 |
|                                                     |         |                              | pXCAW19 | NZ_CP009035.<br>1 | CP009035.1 | 0.018869 | 63.1 | 16    | 16    |        |                                                                                         |
|                                                     |         |                              | pXCAW58 | NZ_CP009036.<br>1 | CP009036.1 | 0.058317 | 61.9 | 56    | 63    |        |                                                                                         |
| <i>X.axonopodis</i> pv. <i>citri</i><br>strain AW16 | XacAW16 | Mesophyllic<br>phytopathogen | Chr     | NZ_CP009040.<br>1 | CP009040.1 | 5.32     | 64.7 | 4,356 | 4,561 | Citrus | ISME J. 2015 Oct;9(10):2128-38. Epub<br>2015 Feb 17. PMID: 25689023<br>Zhang et al 2015 |
|                                                     |         |                              | pXCAW19 | NZ_CP009038.<br>1 | CP009038.1 | 0.018869 | 63.1 | 16    | 16    |        |                                                                                         |
|                                                     |         |                              | pXCAW58 | NZ_CP009039.<br>1 | CP009039.1 | 0.058317 | 61.9 | 56    | 63    |        |                                                                                         |
| <i>X.axonopodis</i> pv. <i>citri</i><br>strain BL18 | XacBL18 | Mesophyllic<br>phytopathogen | Chr     | NZ_CP009025.<br>1 | CP009025.1 | 5.18     | 64.8 | 4,233 | 4,408 | Citrus | ISME J. 2015 Oct;9(10):2128-38. Epub<br>2015 Feb 17. PMID: 25689023<br>Zhang et al 2015 |
|                                                     |         |                              | pXAC33  | NZ_CP009023.<br>1 | CP009023.1 | 0.026933 | 61.6 | 26    | 28    |        |                                                                                         |
|                                                     |         |                              | pXAC64  | NZ_CP009024.<br>1 | CP009024.1 | 0.06492  | 61.4 | 61    | 65    |        |                                                                                         |
| <i>X.axonopodis</i> pv. <i>citri</i><br>strain FB19 | XacFB19 | Mesophyllic<br>phytopathogen | Chr     | NZ_CP009022.<br>1 | CP009022.1 | 5.18     | 64.8 | 4,233 | 4,407 | Citrus | ISME J. 2015 Oct;9(10):2128-38. Epub<br>2015 Feb 17. PMID: 25689023<br>Zhang et al 2015 |
|                                                     |         |                              | pXAC33  | NZ_CP009020.<br>1 | CP009020.1 | 0.026933 | 61.6 | 26    | 28    |        |                                                                                         |
|                                                     |         |                              | pXAC64  | NZ_CP009021.<br>1 | CP009021.1 | 0.06492  | 61.4 | 61    | 65    |        |                                                                                         |
| <i>X.axonopodis</i> pv. <i>citri</i><br>strain GD2  | XacGD2  | Mesophyllic<br>phytopathogen | Chr     | NZ_CP009019.<br>1 | CP009019.1 | 5.13     | 64.8 | 4,206 | 4,376 | Citrus | ISME J. 2015 Oct;9(10):2128-38. Epub<br>2015 Feb 17. PMID: 25689023<br>Zhang et al 2015 |
|                                                     |         |                              | pXAC33  | NZ_CP009017.<br>1 | CP009017.1 | 0.033703 | 61.9 | 33    | 35    |        |                                                                                         |
|                                                     |         |                              | pXAC64  | NZ_CP009018.<br>1 | CP009018.1 | 0.06492  | 61.4 | 60    | 64    |        |                                                                                         |
| <i>X.axonopodis</i> pv. <i>citri</i><br>strain GD3  | XacGD3  | Mesophyllic<br>phytopathogen | Chr     | NZ_CP009016.<br>1 | CP009016.1 | 5.13     | 64.8 | 4,202 | 4,373 | Citrus | ISME J. 2015 Oct;9(10):2128-38. Epub<br>2015 Feb 17. PMID: 25689023<br>Zhang et al 2015 |
|                                                     |         |                              | pXAC33  | NZ_CP009014.<br>1 | CP009014.1 | 0.033703 | 61.9 | 33    | 35    |        |                                                                                         |
|                                                     |         |                              | pXAC64  | NZ_CP009015.<br>1 | CP009015.1 | 0.064919 | 61.4 | 59    | 64    |        |                                                                                         |
| <i>X.axonopodis</i> pv. <i>citri</i><br>strain JX4  | XacJX4  | Mesophyllic<br>phytopathogen | Chr     | NZ_CP009013.<br>1 | CP009013.1 | 5.12     | 64.8 | 4,201 | 4,373 | Citrus | ISME J. 2015 Oct;9(10):2128-38. Epub<br>2015 Feb 17. PMID: 25689023<br>Zhang et al 2015 |
|                                                     |         |                              | pXAC33  | NZ_CP009011.<br>1 | CP009011.1 | 0.033695 | 61.9 | 32    | 35    |        |                                                                                         |
|                                                     |         |                              | pXAC64  | NZ_CP009012.<br>1 | CP009012.1 | 0.064912 | 61.4 |       | 64    |        |                                                                                         |
| <i>X.axonopodis</i> pv. <i>citri</i><br>strain JX5  | XacJX5  | Mesophyllic<br>phytopathogen | Chr     | NZ_CP009010.<br>1 | CP009010.1 | 5.12     | 64.8 | 4,201 | 4,375 | Citrus | ISME J. 2015 Oct;9(10):2128-38. Epub<br>2015 Feb 17. PMID: 25689023<br>Zhang et al 2015 |
|                                                     |         |                              | pXAC33  | NZ_CP009008.<br>1 | CP009008.1 | 0.033695 | 61.9 | 32    | 35    |        |                                                                                         |



|                                                  |         |                           |        |               |            |          |      |       |       |        |                                                                                   |
|--------------------------------------------------|---------|---------------------------|--------|---------------|------------|----------|------|-------|-------|--------|-----------------------------------------------------------------------------------|
|                                                  |         |                           | pXAC64 | NZ_CP009009.1 | CP009009.1 | 0.064912 | 61.4 | 59    | 64    |        |                                                                                   |
| <i>X.axonopodis</i> pv. <i>citri</i> strain JX6  | XacJX6  | Mesophyllic phytopathogen | Chr    | NZ_CP011827.1 | CP011827.1 | 5.12     | 64.8 | 4,192 | 4,357 | Citrus | Direct Submission / Unpublished Zhang et al 2015                                  |
|                                                  |         |                           | pXAC64 | NZ_CP013664.1 | CP013664.1 | 0.064919 | 61.4 | 60    | 64    |        |                                                                                   |
|                                                  |         |                           | pXAC33 | NZ_CP013665.1 | CP013665.1 | 0.033703 | 61.9 | 33    | 35    |        |                                                                                   |
| <i>X.axonopodis</i> pv. <i>citri</i> strain MF20 | XacMF20 | Mesophyllic phytopathogen | Chr    | NZ_CP009007.1 | CP009007.1 | 5.18     | 64.8 | 4,234 | 4,408 | Citrus | ISME J. 2015 Oct;9(10):2128-38. Epub 2015 Feb 17. PMID: 25689023 Zhang et al 2015 |
|                                                  |         |                           | pXAC33 | NZ_CP009005.1 | CP009005.1 | 0.026933 | 61.6 | 26    | 28    |        |                                                                                   |
|                                                  |         |                           | pXAC64 | NZ_CP009006.1 | CP009006.1 | 0.06492  | 61.4 | 61    | 65    |        |                                                                                   |
| <i>X.axonopodis</i> pv. <i>citri</i> strain MN10 | XacMN10 | Mesophyllic phytopathogen | Chr    | NZ_CP009004.1 | CP009004.1 | 5.12     | 64.8 | 4,201 | 4,376 | Citrus | ISME J. 2015 Oct;9(10):2128-38. Epub 2015 Feb 17. PMID: 25689023 Zhang et al 2015 |
|                                                  |         |                           | pXAC33 | NZ_CP009002.1 | CP009002.1 | 0.033702 | 61.9 | 33    | 35    |        |                                                                                   |
|                                                  |         |                           | pXAC64 | NZ_CP009003.1 | CP009003.1 | 0.063721 | 61.3 | 58    | 62    |        |                                                                                   |
| <i>X.axonopodis</i> pv. <i>citri</i> strain MN11 | XacMN11 | Mesophyllic phytopathogen | Chr    | NZ_CP009001.1 | CP009001.1 | 5.12     | 64.8 | 4,199 | 4,370 | Citrus | ISME J. 2015 Oct;9(10):2128-38. Epub 2015 Feb 17. PMID: 25689023 Zhang et al 2015 |
|                                                  |         |                           | pXAC33 | NZ_CP008999.1 | CP008999.1 | 0.033703 | 61.9 | 33    | 35    |        |                                                                                   |
|                                                  |         |                           | pXAC64 | NZ_CP009000.1 | CP009000.1 | 0.063721 | 61.3 | 58    | 62    |        |                                                                                   |
| <i>X.axonopodis</i> pv. <i>citri</i> strain MN12 | XacMN12 | Mesophyllic phytopathogen | Chr    | NZ_CP008998.1 | CP008998.1 | 5.12     | 64.8 | 4,205 | 4,376 | Citrus | ISME J. 2015 Oct;9(10):2128-38. Epub 2015 Feb 17. PMID: 25689023 Zhang et al 2015 |
|                                                  |         |                           | pXAC33 | NZ_CP008996.1 | CP008996.1 | 0.033703 | 61.9 | 33    | 35    |        |                                                                                   |
|                                                  |         |                           | pXAC64 | NZ_CP008997.1 | CP008997.1 | 0.063721 | 61.3 | 58    | 62    |        |                                                                                   |
| <i>X.axonopodis</i> pv. <i>citri</i> strain NT17 | XacNT17 | Mesophyllic phytopathogen | Chr    | NZ_CP008995.1 | CP008995.1 | 5.18     | 64.8 | 4,233 | 4,406 | Citrus | ISME J. 2015 Oct;9(10):2128-38. Epub 2015 Feb 17. PMID: 25689023 Zhang et al 2015 |
|                                                  |         |                           | pXAC33 | NZ_CP008993.1 | CP008993.1 | 0.028776 | 61.7 | 29    | 31    |        |                                                                                   |
|                                                  |         |                           | pXAC64 | NZ_CP008994.1 | CP008994.1 | 0.06492  | 61.4 | 61    | 65    |        |                                                                                   |
| <i>X.axonopodis</i> pv. <i>citri</i> strain U16  | XacU16  | Mesophyllic phytopathogen | Chr    | NZ_CP008992.1 | CP008992.1 | 5.12     | 64.8 | 4,201 | 4,374 | Citrus | ISME J. 2015 Oct;9(10):2128-38. Epub 2015 Feb 17. PMID: 25689023 Zhang et al 2015 |
|                                                  |         |                           | pXAC33 | NZ_CP008990.1 | CP008990.1 | 0.033703 | 61.9 | 34    | 36    |        |                                                                                   |
|                                                  |         |                           | pXAC64 | NZ_CP008991.1 | CP008991.1 | 0.06492  | 61.4 | 60    | 64    |        |                                                                                   |
| <i>X.axonopodis</i> pv. <i>citri</i> strain U17  | XacU17  | Mesophyllic phytopathogen | Chr    | NZ_CP008989.1 | CP008989.1 | 5.12     | 64.8 | 4,203 | 4,371 | Citrus | ISME J. 2015 Oct;9(10):2128-38. Epub 2015 Feb 17. PMID: 25689023                  |

|                                                             |              |                             |          |               |            |          |      |       |       |          |                                                                                            |
|-------------------------------------------------------------|--------------|-----------------------------|----------|---------------|------------|----------|------|-------|-------|----------|--------------------------------------------------------------------------------------------|
|                                                             |              |                             | pXAC33   | NZ_CP008987.1 | CP008987.1 | 0.033703 | 61.9 | 33    | 35    |          | Zhang et al 2015                                                                           |
|                                                             |              |                             | pXAC64   | NZ_CP008988.1 | CP008988.1 | 0.06492  | 61.4 | 60    | 64    |          |                                                                                            |
| <i>X.campestris</i> strain 17                               | Xc17         | Vascular phytopathogen      | Chr      | NZ_CP011256.1 | CP011256.1 | 5.25     | 65.4 | 4,255 | 4,423 | Brassica | Direct Submission / Unpublished Qian et al 2005                                            |
| <i>X.campestris</i> pv. <i>campestris</i> strain B100       | XccB100      | Vascular phytopathogen      | Chr      | NC_010688.1   | AM920689.1 | 5.08     | 65   | 4,202 | 4,334 | Brassica | J Biotechnol. 2008 Mar 20;134(1-2):33-45. Epub 2008 Jan 20. PMID: 18304669 Qian et al 2005 |
| <i>X.campestris</i> pv. <i>campestris</i> strain ICMP 21080 | XccICMP21080 | Vascular phytopathogen      | Chr      | NZ_CP012145.1 | CP012145.1 | 4.91     | 65.3 | 4,022 | 4,179 | Brassica | Genome Announc. 2015 Oct 29;3(5). PMID: 26514760 Qian et al 2005                           |
| <i>X.campestris</i> pv. <i>campestris</i> strain ICMP 4013  | XccICMP4013  | Vascular phytopathogen      | Chr      | NZ_CP012146.1 | CP012146.1 | 4.91     | 65.3 | 4,007 | 4,184 | Brassica | Genome Announc. 2015 Oct 29;3(5). PMID: 26514760 Qian et al 2005                           |
| <i>X.fastidiosa</i> strain MUL0034                          | XfMUL0034    | Xylem-limited phytopathogen | Chr      | NZ_CP006740.1 | CP006740.1 | 2.64     | 52   | 2,204 | 2,365 | Mulberry | Direct Submission / Unpublished Guan et al 2014                                            |
|                                                             |              |                             | unnamed2 | NZ_CP006739.1 | CP006739.1 | 0.024391 | 49   | 30    | 33    |          |                                                                                            |
| <i>X.fastidiosa</i> subsp. <i>sandyi</i> strain Ann-1       | XfsandyiAnn1 | Xylem-limited phytopathogen | Chr      | NZ_CP006696.1 | CP006696.1 | 2.75     | 52.1 | 2,339 | 2,536 | Oleander | Direct Submission / Unpublished Bhattacharyya et al 2002                                   |
|                                                             |              |                             | unnamed1 | NZ_CP006697.1 | CP006697.1 | 0.030305 | 49.5 | 36    | 39    |          |                                                                                            |
| <i>X.fuscans</i> subsp. <i>fuscans</i> strain 4834-R        | Xfus4834R    | Vascular phytopathogen      | Chr      | NC_022541.1   | FO681494.1 | 4.98     | 64.8 | 3,907 | 4,182 | Bean     | BMC Genomics. 2013 Nov 6;14:761. PMID: 24195767 Darrasse et al 2013                        |
|                                                             |              |                             | pla      | NC_022539.1   | FO681495.1 | 0.045224 | 61.3 | 39    | 49    |          |                                                                                            |
|                                                             |              |                             | plb      | NC_022540.1   | FO681496.1 | 0.019514 | 60.6 | 22    | 23    |          |                                                                                            |
|                                                             |              |                             | plc      | NC_022542.1   | FO681497.1 | 0.04195  | 60   | 36    | 42    |          |                                                                                            |
| <i>X.oryzae</i> pv. <i>oryzicola</i> strain B8-12           | XooB812      | Mesophyllic phytopathogen   | Chr      | NZ_CP011955.1 | CP011955.1 | 4.79     | 64.1 | 3,749 | 4,152 | Oryza    | Direct Submission / Unpublished Bogdanove et al 2011                                       |
| <i>X.oryzae</i> pv. <i>oryzicola</i> strain BLS279          | XooBLS279    | Mesophyllic phytopathogen   | Chr      | NZ_CP011956.1 | CP011956.1 | 4.79     | 64.1 | 3,743 | 4,147 | Oryza    | Direct Submission / Unpublished Bogdanove et al 2011                                       |
| <i>X.oryzae</i> pv. <i>oryzicola</i> strain BXOR1           | XooBXOR1     | Mesophyllic phytopathogen   | Chr      | NZ_CP011957.1 | CP011957.1 | 4.69     | 64.1 | 3,660 | 4,053 | Oryza    | Direct Submission / Unpublished Bogdanove et al 2011                                       |
| <i>X.oryzae</i> pv. <i>oryzicola</i> strain CFBP2286        | XooCFBP2286  | Mesophyllic phytopathogen   | Chr      | NZ_CP011962.1 | CP011962.1 | 4.97     | 64   | 3,906 | 4,317 | Oryza    | Direct Submission / Unpublished Bogdanove et al 2011                                       |
|                                                             |              |                             | unnamed  | NZ_CP011963.1 | CP011963.1 | 0.036574 | 60.6 | 45    | 47    |          |                                                                                            |
| <i>X.oryzae</i> pv. <i>oryzicola</i> strain CFBP7331        | XooCFBP7331  | Mesophyllic phytopathogen   | Chr      | NZ_CP011958.1 | CP011958.1 | 5.01     | 63.9 | 3,919 | 4,377 | Oryza    | Direct Submission / Unpublished Bogdanove et al 2011                                       |
| <i>X.oryzae</i> pv. <i>oryzicola</i> strain CFBP7341        | XooCFBP7341  | Mesophyllic phytopathogen   | Chr      | NZ_CP011959.1 | CP011959.1 | 5.02     | 63.9 | 3,934 | 4,384 | Oryza    | Direct Submission / Unpublished Bogdanove et al 2011                                       |

|                                                         |             |                           |         |               |            |          |      |       |       |       |                                                      |
|---------------------------------------------------------|-------------|---------------------------|---------|---------------|------------|----------|------|-------|-------|-------|------------------------------------------------------|
| <i>X.oryzae</i> pv. <i>oryzicola</i> strain CFBP7342    | XooCFBP7342 | Mesophyllic phytopathogen | Chr     | NZ_CP007221.1 | CP007221.1 | 5.08     | 64   | 4,083 | 4,537 | Oryza | Direct Submission / Unpublished Bogdanove et al 2011 |
| <i>X.oryzae</i> pv. <i>oryzicola</i> strain L8          | XooL8       | Mesophyllic phytopathogen | Chr     | NZ_CP011960.1 | CP011960.1 | 4.8      | 64.1 | 3,735 | 4,139 | Oryza | Direct Submission / Unpublished Bogdanove et al 2011 |
| <i>X.oryzae</i> pv. <i>oryzae</i> strain PXO86          | XooPXO86    | Vascular phytopathogen    | Chr     | NZ_CP007166.1 | CP007166.1 | 5.02     | 63.7 | 4,178 | 4,593 | Oryza | Direct Submission / Unpublished Qian et al 2005      |
| <i>X.oryzae</i> pv. <i>oryzicola</i> strain RS105       | XooRS105    | Mesophyllic phytopathogen | Chr     | NZ_CP011961.1 | CP011961.1 | 4.78     | 64.1 | 3,736 | 4,152 | Oryza | Direct Submission / Unpublished Bogdanove et al 2011 |
| <i>X.oryzae</i> pv. <i>oryzicola</i> strain YM15        | XooYM15     | Mesophyllic phytopathogen | Chr     | NZ_CP007810.1 | CP007810.1 | 4.43     | 64.1 | 3,530 | 3,887 | Oryza | Direct Submission / Unpublished Bogdanove et al 2011 |
| <i>X.sacchari</i> strain R1                             | XsacchariR1 | Biocontrol                | Chr     | NZ_CP010409.1 | CP010409.1 | 4.5      | 68.9 | 3,432 | 3,642 | Oryza | Direct Submission / Unpublished Fang et al 2015      |
|                                                         |             |                           | unnamed | NZ_CP010410.1 | CP010410.1 | 0.508653 | 69.5 | 404   | 441   |       |                                                      |
| <i>X.translucens</i> pv. <i>undulosa</i> strain Xtu4699 | Xtu4699     | Mesophyllic phytopathogen | Chr     | NZ_CP008714.1 | CP008714.1 | 4.56     | 68.1 | 3,585 | 3,783 | Wheat | Direct Submission / Unpublished Gardiner et al 2014  |

**Table S2.** Members of the seven protein families enriched in Xanthomonadaceae phytopathogens.

| NCBI ID                            | NCBI accession, protein name and species/strain                                                  |
|------------------------------------|--------------------------------------------------------------------------------------------------|
| <b>Secreted lipase (LipA/LesA)</b> |                                                                                                  |
| <a href="#">21241272</a>           | NP_640854.1 hypothetical protein XAC0501 [Xanthomonas axonopodis pv. citri str. 306]             |
| <a href="#">930138311</a>          | AJZ38311.1 hypothetical protein J152_00616 [Xac5208]                                             |
| <a href="#">470470433</a>          | YP_007635001.1 hypothetical protein XAC29_02550 [Xac29_c1]                                       |
| <a href="#">932267091</a>          | AJD67091.1 hypothetical protein J151_00622 [Xanthomonas citri subsp. citri A306]                 |
| <a href="#">471266461</a>          | YP_007648926.1 secreted lipase [Xanthomonas citri subsp. citri Aw12879]                          |
| <a href="#">930243128</a>          | AJZ43128.1 Dienelactone hydrolase [XacAW13]                                                      |
| <a href="#">930347744</a>          | AJZ47744.1 Dienelactone hydrolase [XacAW14]                                                      |
| <a href="#">930452363</a>          | AJZ52363.1 Dienelactone hydrolase [XacAW15]                                                      |
| <a href="#">930565158</a>          | AJZ65158.1 Dienelactone hydrolase [XacAW16]                                                      |
| <a href="#">930633842</a>          | AJZ33842.1 Dienelactone hydrolase [XacBL18]                                                      |
| <a href="#">930729379</a>          | AJZ29379.1 Dienelactone hydrolase [XacFB19]                                                      |
| <a href="#">930824961</a>          | AJZ24961.1 Dienelactone hydrolase [XacGD2]                                                       |
| <a href="#">930920535</a>          | AJZ20535.1 Dienelactone hydrolase [XacGD3]                                                       |
| <a href="#">931016112</a>          | AJZ16112.1 Dienelactone hydrolase [XacJX4]                                                       |
| <a href="#">931111683</a>          | AJZ11683.1 Dienelactone hydrolase [XacJX5]                                                       |
| <a href="#">932323755</a>          | AKM23755.1 lipase [Xanthomonas citri pv. citri jx-6]                                             |
| <a href="#">931207212</a>          | AJZ07212.1 Dienelactone hydrolase [XacMF20]                                                      |
| <a href="#">931302789</a>          | AJZ02789.1 Dienelactone hydrolase [XacMN10]                                                      |
| <a href="#">931498365</a>          | AJY98365.1 Dienelactone hydrolase [XacMN11]                                                      |
| <a href="#">931593941</a>          | AJY93941.1 Dienelactone hydrolase [XacMN12]                                                      |
| <a href="#">931689470</a>          | AJY89470.1 Dienelactone hydrolase [XacNT17]                                                      |
| <a href="#">931785047</a>          | AJY85047.1 Dienelactone hydrolase [XacUI6]                                                       |
| <a href="#">931880625</a>          | AJY80625.1 Dienelactone hydrolase [XacUI7]                                                       |
| <a href="#">285019895</a>          | YP_003377606.1 hypothetical protein XALc_3133 [Xanthomonas albilineans GPE PC73]                 |
| <a href="#">346723430</a>          | YP_004850099.1 hypothetical protein XACM_0494 [XalfaF1]                                          |
| <a href="#">932480684</a>          | AKC80684.1 lipase [Xanthomonas campestris 17]                                                    |
| <a href="#">66767479</a>           | YP_242241.1 hypothetical protein XC_1151 [Xanthomonas campestris pv. campestris str. 8004]       |
| <a href="#">21232388</a>           | NP_638305.1 hypothetical protein XCC2957 [Xanthomonas campestris pv. campestris str. ATCC 33913] |
| <a href="#">932550538</a>          | CAP50538.1 Putative secreted lipase [Xanthomonas campestris pv. campestris B100]                 |
| <a href="#">932615456</a>          | AKS15456.1 lipase [Xanthomonas campestris pv. campestris ICMP 21080]                             |
| <a href="#">932719487</a>          | AKS19487.1 lipase [Xanthomonas campestris pv. campestris ICMP 4013]                              |
| <a href="#">384428952</a>          | YP_005638312.1 hypothetical protein XCR_3331 [Xanthomonas campestris pv. raphani 756C]           |
| <a href="#">989122167</a>          | XCV0536 CAJ22167 putative secreted lipase [Xcv8510_c1]                                           |
| <a href="#">932812529</a>          | AIC12529.1 lipase [Xylella fastidiosa MUL0034]                                                   |
| <a href="#">932812913</a>          | AIC12913.1 lipase [Xylella fastidiosa MUL0034]                                                   |
| <a href="#">932812914</a>          | AIC12914.1 lipase [Xylella fastidiosa MUL0034]                                                   |

|                                    |                                                                                                |
|------------------------------------|------------------------------------------------------------------------------------------------|
| <a href="#">932910260</a>          | AIC10260.1 lipase [ <i>Xylella fastidiosa</i> subsp. sandyi Ann-1]                             |
| <a href="#">932910261</a>          | AIC10261.1 lipase [ <i>Xylella fastidiosa</i> subsp. sandyi Ann-1]                             |
| <a href="#">932910717</a>          | AIC10717.1 lipase [ <i>Xylella fastidiosa</i> subsp. sandyi Ann-1]                             |
| <a href="#">549713492</a>          | YP_008637355.1 secreted lipase [Xfus4834_c1]                                                   |
| <a href="#">933092053</a>          | AKN92053.1 lipase [ <i>Xanthomonas oryzae</i> pv. oryzicola B8-12]                             |
| <a href="#">384421071</a>          | YP_005630431.1 hypothetical protein XOC_4185 [ <i>Xanthomonas oryzae</i> pv. oryzicola BLS256] |
| <a href="#">933195793</a>          | AKN95793.1 lipase [ <i>Xanthomonas oryzae</i> pv. oryzicola BLS279]                            |
| <a href="#">933299526</a>          | AKN99526.1 lipase [ <i>Xanthomonas oryzae</i> pv. oryzicola BXOR1]                             |
| <a href="#">933321296</a>          | AKO21296.1 lipase [ <i>Xanthomonas oryzae</i> pv. oryzicola CFBP2286]                          |
| <a href="#">933405935</a>          | AKO05935.1 lipase [ <i>Xanthomonas oryzae</i> pv. oryzicola CFBP7331]                          |
| <a href="#">933505935</a>          | AKO05935.1 lipase [ <i>Xanthomonas oryzae</i> pv. oryzicola CFBP7341]                          |
| <a href="#">933686168</a>          | AJQ86168.1 lipase [ <i>Xanthomonas oryzae</i> pv. oryzicola CFBP7342]                          |
| <a href="#">933711014</a>          | AKO11014.1 lipase [ <i>Xanthomonas oryzae</i> pv. oryzicola L8]                                |
| <a href="#">933885004</a>          | AJQ85004.1 lipase [ <i>Xanthomonas oryzae</i> pv. oryzae PXO86]                                |
| <a href="#">933911014</a>          | AKO11014.1 lipase [ <i>Xanthomonas oryzae</i> pv. oryzicola RS105]                             |
| <a href="#">934065497</a>          | AKK65497.1 lipase [ <i>Xanthomonas oryzae</i> pv. oryzicola YM15]                              |
| <a href="#">58580149</a>           | YP_199165.1 hypothetical protein XOO0526 [ <i>Xanthomonas oryzae</i> pv. oryzae KACC 10331]    |
| <a href="#">84622147</a>           | YP_449519.1 hypothetical protein XOO_0490 [ <i>Xanthomonas oryzae</i> pv. oryzae MAFF 311018]  |
| <a href="#">188578865</a>          | YP_001915794.1 hypothetical protein PXO_02951 [ <i>Xanthomonas oryzae</i> pv. oryzae PXO99A]   |
| <a href="#">935546583</a>          | AJC46583.1 lipase [ <i>Xanthomonas sacchari</i> R1]                                            |
| <a href="#">935666103</a>          | AKK66103.1 lipase [ <i>Xanthomonas translucens</i> pv. undulosa Xtu 4699]                      |
| <a href="#">15836959</a>           | NP_297647.1 hypothetical protein XF0357 [ <i>Xylella fastidiosa</i> 9a5c]                      |
| <a href="#">15836960</a>           | NP_297648.1 hypothetical protein XF0358 [ <i>Xylella fastidiosa</i> 9a5c]                      |
| <a href="#">15838742</a>           | NP_299430.1 hypothetical protein XF2151 [ <i>Xylella fastidiosa</i> 9a5c]                      |
| <a href="#">386083129</a>          | YP_005999411.1 putative secreted lipase [ <i>Xylella fastidiosa</i> subsp. fastidiosa GB514]   |
| <a href="#">386083642</a>          | YP_005999924.1 putative secreted lipase [ <i>Xylella fastidiosa</i> subsp. fastidiosa GB514]   |
| <a href="#">386083643</a>          | YP_005999925.1 putative secreted lipase [ <i>Xylella fastidiosa</i> subsp. fastidiosa GB514]   |
| <a href="#">170730482</a>          | YP_001775915.1 hypothetical protein Xfasm12_1355 [ <i>Xylella fastidiosa</i> M12]              |
| <a href="#">170730948</a>          | YP_001776381.1 hypothetical protein Xfasm12_1869 [ <i>Xylella fastidiosa</i> M12]              |
| <a href="#">182681826</a>          | YP_001829986.1 putative secreted lipase [ <i>Xylella fastidiosa</i> M23]                       |
| <a href="#">182682312</a>          | YP_001830472.1 putative secreted lipase [ <i>Xylella fastidiosa</i> M23]                       |
| <a href="#">182682313</a>          | YP_001830473.1 putative secreted lipase [ <i>Xylella fastidiosa</i> M23]                       |
| <a href="#">28199099</a>           | NP_779413.1 hypothetical protein PD1211 [ <i>Xylella fastidiosa</i> Temecula1]                 |
| <a href="#">28199577</a>           | NP_779891.1 hypothetical protein PD1702 [ <i>Xylella fastidiosa</i> Temecula1]                 |
| <a href="#">28199578</a>           | NP_779892.1 hypothetical protein PD1703 [ <i>Xylella fastidiosa</i> Temecula1]                 |
| Number of proteins = 71            |                                                                                                |
| Gblocks 418/451 (92%) <sup>a</sup> |                                                                                                |
| <b>Alpha-L-fucosidase (FucA1)</b>  |                                                                                                |
| <a href="#">21242059</a>           | NP_641641.1 hypothetical protein XAC1306 [ <i>Xanthomonas axonopodis</i> pv. citri str. 306]   |
| <a href="#">930139117</a>          | AJZ39117.1 Alpha-L-fucosidase [Xac5208]                                                        |

|                           |                                                                                                  |
|---------------------------|--------------------------------------------------------------------------------------------------|
| <a href="#">470471206</a> | YP_007635774.1 Alpha-L-fucosidase [Xac29_c1]                                                     |
| <a href="#">932267896</a> | AJD67896.1 alpha-L-fucosidase [Xanthomonas citri subsp. citri A306]                              |
| <a href="#">471268551</a> | YP_007651016.1 Alpha-L-fucosidase [Xanthomonas citri subsp. citri Aw12879]                       |
| <a href="#">930245135</a> | AJZ45135.1 Alpha-L-fucosidase [XacAW13]                                                          |
| <a href="#">930349753</a> | AJZ49753.1 Alpha-L-fucosidase [XacAW14]                                                          |
| <a href="#">930454373</a> | AJZ54373.1 Alpha-L-fucosidase [XacAW15]                                                          |
| <a href="#">930567166</a> | AJZ67166.1 Alpha-L-fucosidase [XacAW16]                                                          |
| <a href="#">930634647</a> | AJZ34647.1 Alpha-L-fucosidase [XacBL18]                                                          |
| <a href="#">930730184</a> | AJZ30184.1 Alpha-L-fucosidase [XacFB19]                                                          |
| <a href="#">930825766</a> | AJZ25766.1 Alpha-L-fucosidase [XacGD2]                                                           |
| <a href="#">930921340</a> | AJZ21340.1 Alpha-L-fucosidase [XacGD3]                                                           |
| <a href="#">931016917</a> | AJZ16917.1 Alpha-L-fucosidase [XacJX4]                                                           |
| <a href="#">931112488</a> | AJZ12488.1 Alpha-L-fucosidase [XacJX5]                                                           |
| <a href="#">932324473</a> | AKM24473.1 alpha-L-fucosidase [Xanthomonas citri pv. citri jx-6]                                 |
| <a href="#">931208017</a> | AJZ08017.1 Alpha-L-fucosidase [XacMF20]                                                          |
| <a href="#">931303594</a> | AJZ03594.1 Alpha-L-fucosidase [XacMN10]                                                          |
| <a href="#">931499170</a> | AJY99170.1 Alpha-L-fucosidase [XacMN11]                                                          |
| <a href="#">931594746</a> | AJY94746.1 Alpha-L-fucosidase [XacMN12]                                                          |
| <a href="#">931690275</a> | AJY90275.1 Alpha-L-fucosidase [XacNT17]                                                          |
| <a href="#">931785851</a> | AJY85851.1 Alpha-L-fucosidase [XacUI6]                                                           |
| <a href="#">931881429</a> | AJY81429.1 Alpha-L-fucosidase [XacUI7]                                                           |
| <a href="#">285018989</a> | YP_003376700.1 alpha-l-fucosidase [Xanthomonas albilineans GPE PC73]                             |
| <a href="#">346724202</a> | YP_004850871.1 Alpha-L-fucosidase [XalfaF1]                                                      |
| <a href="#">932477556</a> | AKC77556.1 alpha-L-fucosidase [Xanthomonas campestris 17]                                        |
| <a href="#">66769296</a>  | YP_244058.1 hypothetical protein XC_2990 [Xanthomonas campestris pv. campestris str. 8004]       |
| <a href="#">21230708</a>  | NP_636625.1 hypothetical protein XCC1251 [Xanthomonas campestris pv. campestris str. ATCC 33913] |
| <a href="#">932552415</a> | CAP52415.1 exported alpha-L-fucosidase [Xanthomonas campestris pv. campestris B100]              |
| <a href="#">932616941</a> | AKS16941.1 alpha-L-fucosidase [Xanthomonas campestris pv. campestris ICMP 21080]                 |
| <a href="#">932720958</a> | AKS20958.1 alpha-L-fucosidase [Xanthomonas campestris pv. campestris ICMP 4013]                  |
| <a href="#">384427165</a> | YP_005636523.1 F5-8 type C domain protein [Xanthomonas campestris pv. raphani 756C]              |
| <a href="#">989122988</a> | XCV1357 CAJ22988 conserved hypothetical protein [Xcv8510_c1]                                     |
| <a href="#">932814110</a> | AIC14110.1 alpha-L-fucosidase [Xylella fastidiosa MUL0034]                                       |
| <a href="#">932910971</a> | AIC10971.1 alpha-L-fucosidase [Xylella fastidiosa subsp. sandyi Ann-1]                           |
| <a href="#">549715993</a> | YP_008639856.1 putative alpha-L-fucosidase [Xfus4834_c1]                                         |
| <a href="#">933094077</a> | AKN94077.1 alpha-L-fucosidase [Xanthomonas oryzae pv. oryzicola B8-12]                           |
| <a href="#">384420107</a> | YP_005629467.1 F5-8 type C domain protein [Xanthomonas oryzae pv. oryzicola BLS256]              |
| <a href="#">933197755</a> | AKN97755.1 alpha-L-fucosidase [Xanthomonas oryzae pv. oryzicola BLS279]                          |
| <a href="#">933200213</a> | AKO00213.1 alpha-L-fucosidase [Xanthomonas oryzae pv. oryzicola BXOR1]                           |
| <a href="#">933320533</a> | AKO20533.1 alpha-L-fucosidase [Xanthomonas oryzae pv. oryzicola CFBP2286]                        |
| <a href="#">933403971</a> | AKO03971.1 alpha-L-fucosidase [Xanthomonas oryzae pv. oryzicola CFBP7331]                        |

|                                    |                                                                                             |
|------------------------------------|---------------------------------------------------------------------------------------------|
| <a href="#">933503971</a>          | AKO03971.1 alpha-L-fucosidase [Xanthomonas oryzae pv. oryzicola CFBP7341]                   |
| <a href="#">933686836</a>          | AJQ86836.1 alpha-L-fucosidase [Xanthomonas oryzae pv. oryzicola CFBP7342]                   |
| <a href="#">933713025</a>          | AKO13025.1 alpha-L-fucosidase [Xanthomonas oryzae pv. oryzicola L8]                         |
| <a href="#">933883801</a>          | AJQ83801.1 alpha-L-fucosidase [Xanthomonas oryzae pv. oryzae PXO86]                         |
| <a href="#">933913025</a>          | AKO13025.1 alpha-L-fucosidase [Xanthomonas oryzae pv. oryzicola RS105]                      |
| <a href="#">934064788</a>          | AKK64788.1 alpha-L-fucosidase [Xanthomonas oryzae pv. oryzicola YM15]                       |
| <a href="#">58581458</a>           | YP_200474.1 hypothetical protein XOO1835 [Xanthomonas oryzae pv. oryzae KACC 10331]         |
| <a href="#">84623388</a>           | YP_450760.1 hypothetical protein XOO_1731 [Xanthomonas oryzae pv. oryzae MAFF 311018]       |
| <a href="#">188577303</a>          | YP_001914232.1 F5/8 type C domain-containing protein [Xanthomonas oryzae pv. oryzae PXO99A] |
| <a href="#">935544489</a>          | AJC44489.1 alpha-L-fucosidase [Xanthomonas sacchari R1]                                     |
| <a href="#">935545484</a>          | AJC45484.1 alpha-L-fucosidase [Xanthomonas sacchari R1]                                     |
| <a href="#">935667025</a>          | AKK67025.1 alpha-L-fucosidase [Xanthomonas translucens pv. undulosa Xtu 4699]               |
| <a href="#">15836711</a>           | NP_297399.1 hypothetical protein XF0106 [Xylella fastidiosa 9a5c]                           |
| <a href="#">386084155</a>          | YP_006000437.1 Alpha-L-fucosidase [Xylella fastidiosa subsp. fastidiosa GB514]              |
| <a href="#">170729323</a>          | YP_001774756.1 alpha-L-fucosidase [Xylella fastidiosa M12]                                  |
| <a href="#">182680643</a>          | YP_001828803.1 alpha-L-fucosidase [Xylella fastidiosa M23]                                  |
| <a href="#">28198017</a>           | NP_778331.1 hypothetical protein PD0080 [Xylella fastidiosa Temecula1]                      |
| Number of proteins = 59            |                                                                                             |
| Gblocks 638/793 (80%) <sup>a</sup> |                                                                                             |
| <b>Alpha-L-fucosidase (NixE)</b>   |                                                                                             |
| <a href="#">21243799</a>           | NP_643381.1 alpha-L-fucosidase [Xanthomonas axonopodis pv. citri str. 306]                  |
| <a href="#">930140890</a>          | AJZ40890.1 Alpha-L-fucosidase [Xac5208]                                                     |
| <a href="#">470472941</a>          | YP_007637509.1 alpha-L-fucosidase [Xac29_c1]                                                |
| <a href="#">932269669</a>          | AJD69669.1 alpha-L-fucosidase [Xanthomonas citri subsp. citri A306]                         |
| <a href="#">471268867</a>          | YP_007651332.1 Alpha-L-fucosidase [Xanthomonas citri subsp. citri Aw12879]                  |
| <a href="#">930245437</a>          | AJZ45437.1 Alpha-L-fucosidase [XacAW13]                                                     |
| <a href="#">930350055</a>          | AJZ50055.1 Alpha-L-fucosidase [XacAW14]                                                     |
| <a href="#">930454675</a>          | AJZ54675.1 Alpha-L-fucosidase [XacAW15]                                                     |
| <a href="#">930567468</a>          | AJZ67468.1 Alpha-L-fucosidase [XacAW16]                                                     |
| <a href="#">930636421</a>          | AJZ36421.1 Alpha-L-fucosidase [XacBL18]                                                     |
| <a href="#">930731958</a>          | AJZ31958.1 Alpha-L-fucosidase [XacFB19]                                                     |
| <a href="#">930827520</a>          | AJZ27520.1 Alpha-L-fucosidase [XacGD2]                                                      |
| <a href="#">930923096</a>          | AJZ23096.1 Alpha-L-fucosidase [XacGD3]                                                      |
| <a href="#">931018669</a>          | AJZ18669.1 Alpha-L-fucosidase [XacJX4]                                                      |
| <a href="#">931114243</a>          | AJZ14243.1 Alpha-L-fucosidase [XacJX5]                                                      |
| <a href="#">932326044</a>          | AKM26044.1 alpha-L-fucosidase [Xanthomonas citri pv. citri jx-6]                            |
| <a href="#">931209790</a>          | AJZ09790.1 Alpha-L-fucosidase [XacMF20]                                                     |
| <a href="#">931305350</a>          | AJZ05350.1 Alpha-L-fucosidase [XacMN10]                                                     |
| <a href="#">931400923</a>          | AJZ00923.1 Alpha-L-fucosidase [XacMN11]                                                     |
| <a href="#">931596498</a>          | AJY96498.1 Alpha-L-fucosidase [XacMN12]                                                     |

|                                    |                                                                                        |
|------------------------------------|----------------------------------------------------------------------------------------|
| <a href="#">931692050</a>          | AJY92050.1 Alpha-L-fucosidase [XacNT17]                                                |
| <a href="#">931787607</a>          | AJY87607.1 Alpha-L-fucosidase [XacUI6]                                                 |
| <a href="#">931883181</a>          | AJY83181.1 Alpha-L-fucosidase [XacUI7]                                                 |
| <a href="#">285018980</a>          | YP_003376691.1 alpha-l-fucosidase [Xanthomonas albilineans GPE PC73]                   |
| <a href="#">346725875</a>          | YP_004852544.1 alpha-L-fucosidase [XalfaF1]                                            |
| <a href="#">932479041</a>          | AKC79041.1 alpha-L-fucosidase [Xanthomonas campestris 17]                              |
| <a href="#">66767548</a>           | YP_242310.1 alpha-L-fucosidase [Xanthomonas campestris pv. campestris str. 8004]       |
| <a href="#">21232319</a>           | NP_638236.1 alpha-L-fucosidase [Xanthomonas campestris pv. campestris str. ATCC 33913] |
| <a href="#">932550614</a>          | CAP50614.1 exported alpha-L-fucosidase [Xanthomonas campestris pv. campestris B100]    |
| <a href="#">932615521</a>          | AKS15521.1 alpha-L-fucosidase [Xanthomonas campestris pv. campestris ICMP 21080]       |
| <a href="#">932719549</a>          | AKS19549.1 alpha-L-fucosidase [Xanthomonas campestris pv. campestris ICMP 4013]        |
| <a href="#">384428891</a>          | YP_005638251.1 alpha-L-fucosidase [Xanthomonas campestris pv. raphani 756C]            |
| <a href="#">989124938</a>          | XCV3207 CAJ24938 alpha-L-fucosidase [Xcv8510_c1]                                       |
| <a href="#">932813376</a>          | AIC13376.1 alpha-L-fucosidase [Xylella fastidiosa MUL0034]                             |
| <a href="#">932909177</a>          | AIC09177.1 alpha-L-fucosidase [Xylella fastidiosa subsp. sandyi Ann-1]                 |
| <a href="#">549714475</a>          | YP_008638338.1 alpha-L-fucosidase [Xfus4834_c1]                                        |
| <a href="#">933094115</a>          | AKN94115.1 alpha-L-fucosidase [Xanthomonas oryzae pv. oryzicola B8-12]                 |
| <a href="#">384420159</a>          | YP_005629519.1 alpha-L-fucosidase [Xanthomonas oryzae pv. oryzicola BLS256]            |
| <a href="#">933197793</a>          | AKN97793.1 alpha-L-fucosidase [Xanthomonas oryzae pv. oryzicola BLS279]                |
| <a href="#">933200176</a>          | AKO00176.1 alpha-L-fucosidase [Xanthomonas oryzae pv. oryzicola BXOR1]                 |
| <a href="#">933320569</a>          | AKO20569.1 alpha-L-fucosidase [Xanthomonas oryzae pv. oryzicola CFBP2286]              |
| <a href="#">933403930</a>          | AKO03930.1 alpha-L-fucosidase [Xanthomonas oryzae pv. oryzicola CFBP7331]              |
| <a href="#">933503930</a>          | AKO03930.1 alpha-L-fucosidase [Xanthomonas oryzae pv. oryzicola CFBP7341]              |
| <a href="#">933686793</a>          | AJQ86793.1 alpha-L-fucosidase [Xanthomonas oryzae pv. oryzicola CFBP7342]              |
| <a href="#">933713067</a>          | AKO13067.1 alpha-L-fucosidase [Xanthomonas oryzae pv. oryzicola L8]                    |
| <a href="#">933883844</a>          | AJQ83844.1 alpha-L-fucosidase [Xanthomonas oryzae pv. oryzae PXO86]                    |
| <a href="#">933913067</a>          | AKO13067.1 alpha-L-fucosidase [Xanthomonas oryzae pv. oryzicola RS105]                 |
| <a href="#">934064827</a>          | AKK64827.1 alpha-L-fucosidase [Xanthomonas oryzae pv. oryzicola YM15]                  |
| <a href="#">58581406</a>           | YP_200422.1 alpha-L-fucosidase [Xanthomonas oryzae pv. oryzae KACC 10331]              |
| <a href="#">84623343</a>           | YP_450715.1 alpha-L-fucosidase [Xanthomonas oryzae pv. oryzae MAFF 311018]             |
| <a href="#">188577354</a>          | YP_001914283.1 alpha-L-fucosidase [Xanthomonas oryzae pv. oryzae PXO99A]               |
| <a href="#">935544517</a>          | AJC44517.1 alpha-L-fucosidase [Xanthomonas sacchari R1]                                |
| <a href="#">935668458</a>          | AKK68458.1 alpha-L-fucosidase [Xanthomonas translucens pv. undulosa Xtu 4699]          |
| <a href="#">15839303</a>           | NP_299991.1 alpha-L-fucosidase [Xylella fastidiosa 9a5c]                               |
| <a href="#">386084013</a>          | YP_006000295.1 Alpha-L-fucosidase [Xylella fastidiosa subsp. fastidiosa GB514]         |
| <a href="#">170731308</a>          | YP_001776741.1 alpha-L-fucosidase [Xylella fastidiosa M12]                             |
| <a href="#">182682679</a>          | YP_001830839.1 alpha-L-fucosidase [Xylella fastidiosa M23]                             |
| <a href="#">28199927</a>           | NP_780241.1 alpha-L-fucosidase [Xylella fastidiosa Temecula1]                          |
| Number of proteins = 58            |                                                                                        |
| Gblocks 559/626 (89%) <sup>a</sup> |                                                                                        |



| <b>VirK protein (VirK)</b> |                                                                                                |
|----------------------------|------------------------------------------------------------------------------------------------|
| <a href="#">21241208</a>   | NP_640790.1 VirK protein [Xanthomonas axonopodis pv. citri str. 306]                           |
| <a href="#">930138249</a>  | AJZ38249.1 hypothetical protein J152_00552 [Xac5208]                                           |
| <a href="#">470470370</a>  | YP_007634938.1 VirK protein [Xac29_c1]                                                         |
| <a href="#">932267029</a>  | AJD67029.1 hypothetical protein J151_00558 [Xanthomonas citri subsp. citri A306]               |
| <a href="#">471266395</a>  | YP_007648860.1 Hypothetical Protein XCAW_00846 [Xanthomonas citri subsp. citri Aw12879]        |
| <a href="#">930243065</a>  | AJZ43065.1 VirK protein [XacAW13]                                                              |
| <a href="#">930347681</a>  | AJZ47681.1 VirK protein [XacAW14]                                                              |
| <a href="#">930452300</a>  | AJZ52300.1 VirK protein [XacAW15]                                                              |
| <a href="#">930565095</a>  | AJZ65095.1 VirK protein [XacAW16]                                                              |
| <a href="#">930633780</a>  | AJZ33780.1 VirK protein [XacBL18]                                                              |
| <a href="#">930729316</a>  | AJZ29316.1 VirK protein [XacFB19]                                                              |
| <a href="#">930824899</a>  | AJZ24899.1 VirK protein [XacGD2]                                                               |
| <a href="#">930920473</a>  | AJZ20473.1 VirK protein [XacGD3]                                                               |
| <a href="#">931016049</a>  | AJZ16049.1 VirK protein [XacJX4]                                                               |
| <a href="#">931111620</a>  | AJZ11620.1 VirK protein [XacJX5]                                                               |
| <a href="#">932323697</a>  | AKM23697.1 hypothetical protein AB890_02275 [Xanthomonas citri pv. citri jx-6]                 |
| <a href="#">931207150</a>  | AJZ07150.1 VirK protein [XacMF20]                                                              |
| <a href="#">931302727</a>  | AJZ02727.1 VirK protein [XacMN10]                                                              |
| <a href="#">931498303</a>  | AJY98303.1 VirK protein [XacMN11]                                                              |
| <a href="#">931593879</a>  | AJY93879.1 VirK protein [XacMN12]                                                              |
| <a href="#">931689408</a>  | AJY89408.1 VirK protein [XacNT17]                                                              |
| <a href="#">931784985</a>  | AJY84985.1 VirK protein [XacUI6]                                                               |
| <a href="#">931880563</a>  | AJY80563.1 VirK protein [XacUI7]                                                               |
| <a href="#">285018768</a>  | YP_003376479.1 virk; protein [Xanthomonas albilineans GPE PC73]                                |
| <a href="#">346723365</a>  | YP_004850034.1 VirK protein [XalfaF1]                                                          |
| <a href="#">932480551</a>  | AKC80551.1 hypothetical protein XB05_18665 [Xanthomonas campestris 17]                         |
| <a href="#">66766773</a>   | YP_241535.1 VirK protein [Xanthomonas campestris pv. campestris str. 8004]                     |
| <a href="#">21229895</a>   | NP_635812.1 VirK protein [Xanthomonas campestris pv. campestris str. ATCC 33913]               |
| <a href="#">932549781</a>  | CAP49781.1 putative exported protein [Xanthomonas campestris pv. campestris B100]              |
| <a href="#">932614831</a>  | AKS14831.1 hypothetical protein AEA00_02125 [Xanthomonas campestris pv. campestris ICMP 21080] |
| <a href="#">932718848</a>  | AKS18848.1 hypothetical protein AEA01_02115 [Xanthomonas campestris pv. campestris ICMP 4013]  |
| <a href="#">384429709</a>  | YP_005639070.1 VirK protein [Xanthomonas campestris pv. raphani 756C]                          |
| <a href="#">989122093</a>  | XCV0462 CAJ22093 VirK protein [Xcv8510_c1]                                                     |
| <a href="#">932812398</a>  | AIC12398.1 VirK protein [Xylella fastidiosa MUL0034]                                           |
| <a href="#">932910345</a>  | AIC10345.1 VirK protein [Xylella fastidiosa subsp. sandyi Ann-1]                               |
| <a href="#">549713434</a>  | YP_008637297.1 VirK protein [Xfus4834_c1]                                                      |
| <a href="#">933094783</a>  | AKN94783.1 hypothetical protein ACU13_18985 [Xanthomonas oryzae pv. oryzicola B8-12]           |
| <a href="#">384417510</a>  | YP_005626870.1 VirK protein [Xanthomonas oryzae pv. oryzicola BLS256]                          |
| <a href="#">933198509</a>  | AKN98509.1 hypothetical protein ACU10_18905 [Xanthomonas oryzae pv. oryzicola BLS279]          |

|                                    |                                                                                            |
|------------------------------------|--------------------------------------------------------------------------------------------|
| <a href="#">933202170</a>          | AKO02170.1 hypothetical protein ACU15_18465 [Xanthomonas oryzae pv. oryzicola BXOR1]       |
| <a href="#">933318448</a>          | AKO18448.1 hypothetical protein ACU11_02055 [Xanthomonas oryzae pv. oryzicola CFBP2286]    |
| <a href="#">933403173</a>          | AKO03173.1 hypothetical protein ACU16_02225 [Xanthomonas oryzae pv. oryzicola CFBP7331]    |
| <a href="#">933503173</a>          | AKO03173.1 hypothetical protein ACU16_02225 [Xanthomonas oryzae pv. oryzicola CFBP7341]    |
| <a href="#">933689400</a>          | AJQ89400.1 hypothetical protein BE73_22035 [Xanthomonas oryzae pv. oryzicola CFBP7342]     |
| <a href="#">933713733</a>          | AKO13733.1 hypothetical protein ACU14_18920 [Xanthomonas oryzae pv. oryzicola L8]          |
| <a href="#">933881330</a>          | AJQ81330.1 hypothetical protein AZ54_00650 [Xanthomonas oryzae pv. oryzae PXO86]           |
| <a href="#">933913733</a>          | AKO13733.1 hypothetical protein ACU14_18920 [Xanthomonas oryzae pv. oryzicola RS105]       |
| <a href="#">934062683</a>          | AKK62683.1 hypothetical protein FE36_01665 [Xanthomonas oryzae pv. oryzicola YM15]         |
| <a href="#">58579754</a>           | YP_198770.1 VirK protein [Xanthomonas oryzae pv. oryzae KACC 10331]                        |
| <a href="#">84621700</a>           | YP_449072.1 VirK protein [Xanthomonas oryzae pv. oryzae MAFF 311018]                       |
| <a href="#">188574397</a>          | YP_001911326.1 VirK protein [Xanthomonas oryzae pv. oryzae PXO99A]                         |
| <a href="#">935545191</a>          | AJC45191.1 hypothetical protein SB85_04925 [Xanthomonas sacchari R1]                       |
| <a href="#">935668166</a>          | AKK68166.1 hypothetical protein FD63_12115 [Xanthomonas translucens pv. undulosa Xtu 4699] |
| <a href="#">15838539</a>           | NP_299227.1 VirK protein [Xylella fastidiosa 9a5c]                                         |
| <a href="#">386084955</a>          | YP_006001237.1 VirK family protein [Xylella fastidiosa subsp. fastidiosa GB514]            |
| <a href="#">170730189</a>          | YP_001775622.1 VirK protein [Xylella fastidiosa M12]                                       |
| <a href="#">182681452</a>          | YP_001829612.1 VirK family protein [Xylella fastidiosa M23]                                |
| <a href="#">28198760</a>           | NP_779074.1 VirK protein [Xylella fastidiosa Temecula1]                                    |
| Number of proteins = 58            |                                                                                            |
| Gblocks 142/174 (81%) <sup>a</sup> |                                                                                            |
| <b>Chorismate mutase (PheA)</b>    |                                                                                            |
| <a href="#">21244372</a>           | NP_643954.1 chorismate mutase [Xanthomonas axonopodis pv. citri str. 306]                  |
| <a href="#">930141457</a>          | AJZ41457.1 Chorismate mutase [Xac5208]                                                     |
| <a href="#">470473507</a>          | YP_007638075.1 chorismate mutase [Xac29_c1]                                                |
| <a href="#">932270238</a>          | AJD70238.1 chorismate mutase [Xanthomonas citri subsp. citri A306]                         |
| <a href="#">471269846</a>          | YP_007652311.1 Chorismate mutase [Xanthomonas citri subsp. citri Aw12879]                  |
| <a href="#">930246402</a>          | AJZ46402.1 chorismate mutase, putative [XacAW13]                                           |
| <a href="#">930351022</a>          | AJZ51022.1 chorismate mutase, putative [XacAW14]                                           |
| <a href="#">930455643</a>          | AJZ55643.1 chorismate mutase, putative [XacAW15]                                           |
| <a href="#">930568433</a>          | AJZ68433.1 chorismate mutase, putative [XacAW16]                                           |
| <a href="#">930636990</a>          | AJZ36990.1 chorismate mutase, putative [XacBL18]                                           |
| <a href="#">930732526</a>          | AJZ32526.1 chorismate mutase, putative [XacFB19]                                           |
| <a href="#">930828085</a>          | AJZ28085.1 chorismate mutase, putative [XacGD2]                                            |
| <a href="#">930923661</a>          | AJZ23661.1 chorismate mutase, putative [XacGD3]                                            |
| <a href="#">931019233</a>          | AJZ19233.1 chorismate mutase, putative [XacJX4]                                            |
| <a href="#">931114809</a>          | AJZ14809.1 chorismate mutase, putative [XacJX5]                                            |
| <a href="#">932326544</a>          | AKM26544.1 chorismate mutase [Xanthomonas citri pv. citri jx-6]                            |
| <a href="#">931210358</a>          | AJZ10358.1 chorismate mutase, putative [XacMF20]                                           |
| <a href="#">931305917</a>          | AJZ05917.1 chorismate mutase, putative [XacMN10]                                           |

|                           |                                                                                                    |
|---------------------------|----------------------------------------------------------------------------------------------------|
| <a href="#">931401489</a> | AJZ01489.1 chorismate mutase, putative [XacMN11]                                                   |
| <a href="#">931597065</a> | AJY97065.1 chorismate mutase, putative [XacMN12]                                                   |
| <a href="#">931692618</a> | AJY92618.1 chorismate mutase, putative [XacNT17]                                                   |
| <a href="#">931788173</a> | AJY88173.1 chorismate mutase, putative [XacUI6]                                                    |
| <a href="#">931883747</a> | AJY83747.1 chorismate mutase, putative [XacUI7]                                                    |
| <a href="#">285019664</a> | YP_003377375.1 chorismate mutase precursor [Xanthomonas albilineans GPE PC73]                      |
| <a href="#">346726415</a> | YP_004853084.1 chorismate mutase [XalfaF1]                                                         |
| <a href="#">932481391</a> | AKC81391.1 chorismate mutase [Xanthomonas campestris 17]                                           |
| <a href="#">66769975</a>  | YP_244737.1 chorismate mutase [Xanthomonas campestris pv. campestris str. 8004]                    |
| <a href="#">21230031</a>  | NP_635948.1 chorismate mutase [Xanthomonas campestris pv. campestris str. ATCC 33913]              |
| <a href="#">932553159</a> | CAP53159.1 Monofunctional chorismate mutase precursor [Xanthomonas campestris pv. campestris B100] |
| <a href="#">932618426</a> | AKS18426.1 chorismate mutase [Xanthomonas campestris pv. campestris ICMP 21080]                    |
| <a href="#">932722436</a> | AKS22436.1 chorismate mutase [Xanthomonas campestris pv. campestris ICMP 4013]                     |
| <a href="#">384426387</a> | YP_005635744.1 chorismate mutase-prephenate dehydratase [Xanthomonas campestris pv. raphani 756C]  |
| <a href="#">989125496</a> | XCV3765 CAJ25496 Chorismate mutase precursor [Xcv8510_c1]                                          |
| <a href="#">932811993</a> | AIC11993.1 chorismate mutase [Xylella fastidiosa MUL0034]                                          |
| <a href="#">932909550</a> | AIC09550.1 chorismate mutase [Xylella fastidiosa subsp. sandyi Ann-1]                              |
| <a href="#">549716313</a> | YP_008640176.1 putative chorismate mutase [Xfus4834_c1]                                            |
| <a href="#">933094590</a> | AKN94590.1 chorismate mutase [Xanthomonas oryzae pv. oryzicola B8-12]                              |
| <a href="#">384420809</a> | YP_005630169.1 chorismate mutase, prephenate dehydratase [Xanthomonas oryzae pv. oryzicola BLS256] |
| <a href="#">933198313</a> | AKN98313.1 chorismate mutase [Xanthomonas oryzae pv. oryzicola BLS279]                             |
| <a href="#">933299696</a> | AKN99696.1 chorismate mutase [Xanthomonas oryzae pv. oryzicola BXOR1]                              |
| <a href="#">933321103</a> | AKO21103.1 chorismate mutase [Xanthomonas oryzae pv. oryzicola CFBP2286]                           |
| <a href="#">933403438</a> | AKO03438.1 chorismate mutase [Xanthomonas oryzae pv. oryzicola CFBP7331]                           |
| <a href="#">933503438</a> | AKO03438.1 chorismate mutase [Xanthomonas oryzae pv. oryzicola CFBP7341]                           |
| <a href="#">933686390</a> | AJQ86390.1 chorismate mutase [Xanthomonas oryzae pv. oryzicola CFBP7342]                           |
| <a href="#">933713539</a> | AKO13539.1 chorismate mutase [Xanthomonas oryzae pv. oryzicola L8]                                 |
| <a href="#">933884788</a> | AJQ84788.1 chorismate mutase [Xanthomonas oryzae pv. oryzae PXO86]                                 |
| <a href="#">933913539</a> | AKO13539.1 chorismate mutase [Xanthomonas oryzae pv. oryzicola RS105]                              |
| <a href="#">934065315</a> | AKK65315.1 chorismate mutase [Xanthomonas oryzae pv. oryzicola YM15]                               |
| <a href="#">58580357</a>  | YP_199373.1 chorismate mutase [Xanthomonas oryzae pv. oryzae KACC 10331]                           |
| <a href="#">84622327</a>  | YP_449699.1 chorismate mutase [Xanthomonas oryzae pv. oryzae MAFF 311018]                          |
| <a href="#">188578708</a> | YP_001915637.1 chorismate mutase [Xanthomonas oryzae pv. oryzae PXO99A]                            |
| <a href="#">935547571</a> | AJC47571.1 chorismate mutase [Xanthomonas sacchari R1]                                             |
| <a href="#">935669031</a> | AKK69031.1 chorismate mutase [Xanthomonas translucens pv. undulosa Xtu 4699]                       |
| <a href="#">15837743</a>  | NP_298431.1 chorismate mutase [Xylella fastidiosa 9a5c]                                            |
| <a href="#">386084504</a> | YP_006000786.1 chorismate mutase [Xylella fastidiosa subsp. fastidiosa GB514]                      |
| <a href="#">170729689</a> | YP_001775122.1 chorismate mutase [Xylella fastidiosa M12]                                          |
| <a href="#">182680983</a> | YP_001829143.1 chorismate mutase [Xylella fastidiosa M23]                                          |

|                                    |                                                                                                                 |
|------------------------------------|-----------------------------------------------------------------------------------------------------------------|
| <a href="#">28198342</a>           | NP_778656.1 chorismate mutase [ <i>Xylella fastidiosa</i> Temecula1]                                            |
| Number of proteins = 58            |                                                                                                                 |
| Gblocks 189/201 (94%) <sup>a</sup> |                                                                                                                 |
| <b>Glycosyl hydrolase (NixF)</b>   |                                                                                                                 |
| <a href="#">21243800</a>           | NP_643382.1 hypothetical protein XAC3073 [ <i>Xanthomonas axonopodis</i> pv. citri str. 306]                    |
| <a href="#">930140891</a>          | AJZ40891.1 putative glycosyl hydrolase [Xac5208]                                                                |
| <a href="#">470472942</a>          | YP_007637510.1 hypothetical protein XAC29_15630 [Xac29_c1]                                                      |
| <a href="#">932269670</a>          | AJD69670.1 putative glycosyl hydrolase [ <i>Xanthomonas citri</i> subsp. citri A306]                            |
| <a href="#">471268868</a>          | YP_007651333.1 glycosyl hydrolase [ <i>Xanthomonas citri</i> subsp. citri Aw12879]                              |
| <a href="#">930245438</a>          | AJZ45438.1 putative glycosyl hydrolase [XacAW13]                                                                |
| <a href="#">930350056</a>          | AJZ50056.1 putative glycosyl hydrolase [XacAW14]                                                                |
| <a href="#">930454676</a>          | AJZ54676.1 putative glycosyl hydrolase [XacAW15]                                                                |
| <a href="#">930567469</a>          | AJZ67469.1 putative glycosyl hydrolase [XacAW16]                                                                |
| <a href="#">930636422</a>          | AJZ36422.1 putative glycosyl hydrolase [XacBL18]                                                                |
| <a href="#">930731959</a>          | AJZ31959.1 putative glycosyl hydrolase [XacFB19]                                                                |
| <a href="#">930827521</a>          | AJZ27521.1 putative glycosyl hydrolase [XacGD2]                                                                 |
| <a href="#">930923097</a>          | AJZ23097.1 putative glycosyl hydrolase [XacGD3]                                                                 |
| <a href="#">931018670</a>          | AJZ18670.1 putative glycosyl hydrolase [XacJX4]                                                                 |
| <a href="#">931114244</a>          | AJZ14244.1 putative glycosyl hydrolase [XacJX5]                                                                 |
| <a href="#">932326045</a>          | AKM26045.1 glycosyl hydrolase [ <i>Xanthomonas citri</i> pv. citri jx-6]                                        |
| <a href="#">931209791</a>          | AJZ09791.1 putative glycosyl hydrolase [XacMF20]                                                                |
| <a href="#">931305351</a>          | AJZ05351.1 putative glycosyl hydrolase [XacMN10]                                                                |
| <a href="#">931400924</a>          | AJZ00924.1 putative glycosyl hydrolase [XacMN11]                                                                |
| <a href="#">931596499</a>          | AJY96499.1 putative glycosyl hydrolase [XacMN12]                                                                |
| <a href="#">931692051</a>          | AJY92051.1 putative glycosyl hydrolase [XacNT17]                                                                |
| <a href="#">931787608</a>          | AJY87608.1 putative glycosyl hydrolase [XacUI6]                                                                 |
| <a href="#">931883182</a>          | AJY83182.1 putative glycosyl hydrolase [XacUI7]                                                                 |
| <a href="#">285018981</a>          | YP_003376692.1 glycosyl hydrolases family 18 [ <i>Xanthomonas albilineans</i> GPE PC73]                         |
| <a href="#">346725876</a>          | YP_004852545.1 glycosyl hydrolase [XalfaF1]                                                                     |
| <a href="#">932479042</a>          | AKC79042.1 glycosyl hydrolase [ <i>Xanthomonas campestris</i> 17]                                               |
| <a href="#">66767547</a>           | YP_242309.1 hypothetical protein XC_1220 [ <i>Xanthomonas campestris</i> pv. <i>campestris</i> str. 8004]       |
| <a href="#">21232320</a>           | NP_638237.1 hypothetical protein XCC2889 [ <i>Xanthomonas campestris</i> pv. <i>campestris</i> str. ATCC 33913] |
| <a href="#">932550613</a>          | CAP50613.1 exported putative chitinase [ <i>Xanthomonas campestris</i> pv. <i>campestris</i> B100]              |
| <a href="#">932615520</a>          | AKS15520.1 glycosyl hydrolase [ <i>Xanthomonas campestris</i> pv. <i>campestris</i> ICMP 21080]                 |
| <a href="#">932719548</a>          | AKS19548.1 glycosyl hydrolase [ <i>Xanthomonas campestris</i> pv. <i>campestris</i> ICMP 4013]                  |
| <a href="#">384428892</a>          | YP_005638252.1 glycosyl hydrolase family protein [ <i>Xanthomonas campestris</i> pv. <i>raphani</i> 756C]       |
| <a href="#">989124939</a>          | XCV3208 CAJ24939 putative glycoside hydrolase family 18 protein [Xcv8510_c1]                                    |
| <a href="#">932811853</a>          | AIC11853.1 glycosyl hydrolase [ <i>Xylella fastidiosa</i> MUL0034]                                              |
| <a href="#">932910774</a>          | AIC10774.1 glycosyl hydrolase [ <i>Xylella fastidiosa</i> subsp. <i>sandyi</i> Ann-1]                           |
| <a href="#">549714474</a>          | YP_008638337.1 putative endo-beta-N-acetylglucosaminidase [Xfus4834_c1]                                         |

|                                    |                                                                                                |
|------------------------------------|------------------------------------------------------------------------------------------------|
| <a href="#">933094116</a>          | AKN94116.1 glycosyl hydrolase [Xanthomonas oryzae pv. oryzicola B8-12]                         |
| <a href="#">384420160</a>          | YP_005629520.1 glycosyl hydrolase family protein [Xanthomonas oryzae pv. oryzicola BLS256]     |
| <a href="#">933197794</a>          | AKN97794.1 glycosyl hydrolase [Xanthomonas oryzae pv. oryzicola BLS279]                        |
| <a href="#">933200175</a>          | AKO00175.1 glycosyl hydrolase [Xanthomonas oryzae pv. oryzicola BXOR1]                         |
| <a href="#">933320570</a>          | AKO20570.1 glycosyl hydrolase [Xanthomonas oryzae pv. oryzicola CFBP2286]                      |
| <a href="#">933403929</a>          | AKO03929.1 glycosyl hydrolase [Xanthomonas oryzae pv. oryzicola CFBP7331]                      |
| <a href="#">933503929</a>          | AKO03929.1 glycosyl hydrolase [Xanthomonas oryzae pv. oryzicola CFBP7341]                      |
| <a href="#">933686792</a>          | AJQ86792.1 glycosyl hydrolase [Xanthomonas oryzae pv. oryzicola CFBP7342]                      |
| <a href="#">933713068</a>          | AKO13068.1 glycosyl hydrolase [Xanthomonas oryzae pv. oryzicola L8]                            |
| <a href="#">933883845</a>          | AJQ83845.1 glycosyl hydrolase [Xanthomonas oryzae pv. oryzae PXO86]                            |
| <a href="#">933913068</a>          | AKO13068.1 glycosyl hydrolase [Xanthomonas oryzae pv. oryzicola RS105]                         |
| <a href="#">934064828</a>          | AKK64828.1 glycosyl hydrolase [Xanthomonas oryzae pv. oryzicola YM15]                          |
| <a href="#">58581405</a>           | YP_200421.1 hypothetical protein XOO1782 [Xanthomonas oryzae pv. oryzae KACC 10331]            |
| <a href="#">84623342</a>           | YP_450714.1 hypothetical protein XOO_1685 [Xanthomonas oryzae pv. oryzae MAFF 311018]          |
| <a href="#">188577355</a>          | YP_001914284.1 glycosyl hydrolase family protein [Xanthomonas oryzae pv. oryzae PXO99A]        |
| <a href="#">935544516</a>          | AJC44516.1 glycosyl hydrolase [Xanthomonas sacchari R1]                                        |
| <a href="#">935668459</a>          | AKK68459.1 glycosyl hydrolase [Xanthomonas translucens pv. undulosa Xtu 4699]                  |
| <a href="#">15837450</a>           | NP_298138.1 hypothetical protein XF0848 [Xylella fastidiosa 9a5c]                              |
| <a href="#">386083776</a>          | YP_006000058.1 glycoside hydrolase family protein [Xylella fastidiosa subsp. fastidiosa GB514] |
| <a href="#">170731069</a>          | YP_001776502.1 hypothetical protein Xfasm12_2002 [Xylella fastidiosa M12]                      |
| <a href="#">182682440</a>          | YP_001830600.1 glycoside hydrolase family protein [Xylella fastidiosa M23]                     |
| <a href="#">28199696</a>           | NP_780010.1 hypothetical protein PD1826 [Xylella fastidiosa Temecula1]                         |
| Number of proteins = 58            |                                                                                                |
| Gblocks 351/359 (97%) <sup>a</sup> |                                                                                                |
| <b>Beta-galactosidase (NixL)</b>   |                                                                                                |
| <a href="#">21243811</a>           | NP_643393.1 beta-galactosidase [Xanthomonas axonopodis pv. citri str. 306]                     |
| <a href="#">930140902</a>          | AJZ40902.1 Beta-galactosidase [Xac5208]                                                        |
| <a href="#">470472953</a>          | YP_007637521.1 beta-galactosidase [Xac29_c1]                                                   |
| <a href="#">932269681</a>          | AJD69681.1 beta-galactosidase [Xanthomonas citri subsp. citri A306]                            |
| <a href="#">471268879</a>          | YP_007651344.1 Beta-galactosidase [Xanthomonas citri subsp. citri Aw12879]                     |
| <a href="#">930245449</a>          | AJZ45449.1 Beta-galactosidase [XacAW13]                                                        |
| <a href="#">930350067</a>          | AJZ50067.1 Beta-galactosidase [XacAW14]                                                        |
| <a href="#">930454687</a>          | AJZ54687.1 Beta-galactosidase [XacAW15]                                                        |
| <a href="#">930567480</a>          | AJZ67480.1 Beta-galactosidase [XacAW16]                                                        |
| <a href="#">930636433</a>          | AJZ36433.1 Beta-galactosidase [XacBL18]                                                        |
| <a href="#">930731970</a>          | AJZ31970.1 Beta-galactosidase [XacFB19]                                                        |
| <a href="#">930827532</a>          | AJZ27532.1 Beta-galactosidase [XacGD2]                                                         |
| <a href="#">930923108</a>          | AJZ23108.1 Beta-galactosidase [XacGD3]                                                         |
| <a href="#">931018681</a>          | AJZ18681.1 Beta-galactosidase [XacJX4]                                                         |
| <a href="#">931114255</a>          | AJZ14255.1 Beta-galactosidase [XacJX5]                                                         |

|                           |                                                                                                       |
|---------------------------|-------------------------------------------------------------------------------------------------------|
| <a href="#">932326055</a> | AKM26055.1 beta-galactosidase [ <i>Xanthomonas citri</i> pv. <i>citri</i> jx-6]                       |
| <a href="#">931209802</a> | AJZ09802.1 Beta-galactosidase [XacMF20]                                                               |
| <a href="#">931305362</a> | AJZ05362.1 Beta-galactosidase [XacMN10]                                                               |
| <a href="#">931400935</a> | AJZ00935.1 Beta-galactosidase [XacMN11]                                                               |
| <a href="#">931596510</a> | AJY96510.1 Beta-galactosidase [XacMN12]                                                               |
| <a href="#">931692062</a> | AJY92062.1 Beta-galactosidase [XacNT17]                                                               |
| <a href="#">931787619</a> | AJY87619.1 Beta-galactosidase [XacUI6]                                                                |
| <a href="#">931883193</a> | AJY83193.1 Beta-galactosidase [XacUI7]                                                                |
| <a href="#">285018987</a> | YP_003376698.1 beta-galactosidase [ <i>Xanthomonas albilineans</i> GPE PC73]                          |
| <a href="#">346725882</a> | YP_004852551.1 beta-galactosidase [XalfaF1]                                                           |
| <a href="#">932479048</a> | AKC79048.1 beta-galactosidase [ <i>Xanthomonas campestris</i> 17]                                     |
| <a href="#">66767541</a>  | YP_242303.1 beta-galactosidase [ <i>Xanthomonas campestris</i> pv. <i>campestris</i> str. 8004]       |
| <a href="#">21232326</a>  | NP_638243.1 beta-galactosidase [ <i>Xanthomonas campestris</i> pv. <i>campestris</i> str. ATCC 33913] |
| <a href="#">932550607</a> | CAP50607.1 exported beta-galactosidase [ <i>Xanthomonas campestris</i> pv. <i>campestris</i> B100]    |
| <a href="#">932615516</a> | AKS15516.1 beta-galactosidase [ <i>Xanthomonas campestris</i> pv. <i>campestris</i> ICMP 21080]       |
| <a href="#">932719544</a> | AKS19544.1 beta-galactosidase [ <i>Xanthomonas campestris</i> pv. <i>campestris</i> ICMP 4013]        |
| <a href="#">384428898</a> | YP_005638258.1 beta-galactosidase [ <i>Xanthomonas campestris</i> pv. <i>raphani</i> 756C]            |
| <a href="#">989124945</a> | XCV3214 CAJ24945 beta-galactosidase [Xcv8510_c1]                                                      |
| <a href="#">932811847</a> | AIC11847.1 beta-galactosidase [ <i>Xylella fastidiosa</i> MUL0034]                                    |
| <a href="#">932910780</a> | AIC10780.1 beta-galactosidase [ <i>Xylella fastidiosa</i> subsp. <i>sandyi</i> Ann-1]                 |
| <a href="#">549714463</a> | YP_008638326.1 beta-galactosidase [Xfus4834_c1]                                                       |
| <a href="#">933094124</a> | AKN94124.1 beta-galactosidase [ <i>Xanthomonas oryzae</i> pv. <i>oryzicola</i> B8-12]                 |
| <a href="#">384420175</a> | YP_005629535.1 beta-galactosidase [ <i>Xanthomonas oryzae</i> pv. <i>oryzicola</i> BLS256]            |
| <a href="#">933197801</a> | AKN97801.1 beta-galactosidase [ <i>Xanthomonas oryzae</i> pv. <i>oryzicola</i> BLS279]                |
| <a href="#">933200167</a> | AKO00167.1 beta-galactosidase [ <i>Xanthomonas oryzae</i> pv. <i>oryzicola</i> BXOR1]                 |
| <a href="#">933320579</a> | AKO20579.1 beta-galactosidase [ <i>Xanthomonas oryzae</i> pv. <i>oryzicola</i> CFBP2286]              |
| <a href="#">933403921</a> | AKO03921.1 beta-galactosidase [ <i>Xanthomonas oryzae</i> pv. <i>oryzicola</i> CFBP7331]              |
| <a href="#">933503921</a> | AKO03921.1 beta-galactosidase [ <i>Xanthomonas oryzae</i> pv. <i>oryzicola</i> CFBP7341]              |
| <a href="#">933686783</a> | AJQ86783.1 beta-galactosidase [ <i>Xanthomonas oryzae</i> pv. <i>oryzicola</i> CFBP7342]              |
| <a href="#">933713076</a> | AKO13076.1 beta-galactosidase [ <i>Xanthomonas oryzae</i> pv. <i>oryzicola</i> L8]                    |
| <a href="#">933883858</a> | AJQ83858.1 beta-galactosidase [ <i>Xanthomonas oryzae</i> pv. <i>oryzae</i> PXO86]                    |
| <a href="#">933913076</a> | AKO13076.1 beta-galactosidase [ <i>Xanthomonas oryzae</i> pv. <i>oryzicola</i> RS105]                 |
| <a href="#">934064835</a> | AKK64835.1 beta-galactosidase [ <i>Xanthomonas oryzae</i> pv. <i>oryzicola</i> YM15]                  |
| <a href="#">58581392</a>  | YP_200408.1 beta-galactosidase [ <i>Xanthomonas oryzae</i> pv. <i>oryzae</i> KACC 10331]              |
| <a href="#">84623327</a>  | YP_450699.1 beta-galactosidase [ <i>Xanthomonas oryzae</i> pv. <i>oryzae</i> MAFF 311018]             |
| <a href="#">188577369</a> | YP_001914298.1 beta-galactosidase [ <i>Xanthomonas oryzae</i> pv. <i>oryzae</i> PXO99A]               |
| <a href="#">935544505</a> | AJC44505.1 beta-galactosidase [ <i>Xanthomonas sacchari</i> R1]                                       |
| <a href="#">935668467</a> | AKK68467.1 beta-galactosidase [ <i>Xanthomonas translucens</i> pv. <i>undulosa</i> Xtu 4699]          |
| <a href="#">15837442</a>  | NP_298130.1 beta-galactosidase [ <i>Xylella fastidiosa</i> 9a5c]                                      |
| <a href="#">386083781</a> | YP_006000063.1 Beta-galactosidase [ <i>Xylella fastidiosa</i> subsp. <i>fastidiosa</i> GB514]         |

|                                                                                                         |                                                               |
|---------------------------------------------------------------------------------------------------------|---------------------------------------------------------------|
| <a href="#">170731075</a>                                                                               | YP_001776508.1 beta-galactosidase [Xylella fastidiosa M12]    |
| <a href="#">182682446</a>                                                                               | YP_001830606.1 beta-galactosidase [Xylella fastidiosa M23]    |
| <a href="#">28199702</a>                                                                                | NP_780016.1 beta-galactosidase [Xylella fastidiosa Temecula1] |
| Number of proteins = 58                                                                                 |                                                               |
| Gblocks 604/685 (88%) <sup>a</sup>                                                                      |                                                               |
| <b>TOTAL: 420</b>                                                                                       |                                                               |
| <sup>a</sup> GBlock remove ambiguously aligned and uninformative positions in the resulting alignments. |                                                               |

**Table S3.** Lipases found in *Xanthomonas* and the different functional parameters of each.

| Old locus tag | New locus tag | OrthoMCL                            | Protein ID | PFAM domains                                                                                                                                        | Size (aa) | TM domain | SP   | Pathways | Name |
|---------------|---------------|-------------------------------------|------------|-----------------------------------------------------------------------------------------------------------------------------------------------------|-----------|-----------|------|----------|------|
| XAC0501       | XAC_RS02605   | NP_640854.1<br>hypothetical protein | AAM35390.1 | LIP; Hydrolase_4;<br>Abhydrolase_6; Peptidase_S9;<br>Peptidase_S15; DUF2974;<br>Chlorophyllase2; DLH;<br>Abhydrolase_4; Cutinase;<br>Chlorophyllase | 385       | 0         | 1-35 | NA       | NA   |
| XAC2393       | XAC_RS12170   | NP_642709.1<br>carboxylesterase     | AAM37245.1 | Abhydrolase_3; Peptidase_S9;<br>COesterase; Hydrolase_4; Esterase_phd;<br>DLH; Abhydrolase_2; FSH1;<br>Lipase_3                                     | 371       | 92-112    | 0    | NA       | NA   |
| XAC3365       | XAC_RS17050   | NP_643672.1<br>hypothetical protein | AAM38208.1 | PI-PLC-C1; PI-PLC-X                                                                                                                                 | 391       | 0         | 1-46 | NA       | NA   |
| XAC1564       | XAC_RS07955   | NP_641897.1<br>acetylhydrolase      | AAM36433.1 | Lipase_GDSL_2; Lipase_GDSL;<br>L; Lipase_GDSL_3                                                                                                     | 476       | 0         | 0    | NA       | NA   |



|         |             |                                          |            |                                                                                                                                         |     |             |   |          |                                   |
|---------|-------------|------------------------------------------|------------|-----------------------------------------------------------------------------------------------------------------------------------------|-----|-------------|---|----------|-----------------------------------|
|         |             | e                                        |            |                                                                                                                                         |     |             |   |          |                                   |
| XAC3674 | XAC_RS18585 | NP_643981.1<br>hypothetical<br>protein   | AAM38517.1 | Hydrolase_4; Esterase; UPF02<br>27; Abhydrolase_1; BAAT_C;<br>Abhydrolase_2;<br>Peptidase_S9; Abhydrolase_3;<br>DLH; Peptidase_S28      | 289 | 0           | 0 | NA       | NA                                |
| XAC0372 | XAC_RS01965 | NP_640728.1<br>hydrolase                 | AAM35264.1 | Hydrolase_4; Abhydrolase_6;<br>Abhydrolase_1; Peptidase_S15<br>;<br>Peptidase_S9; DLH; Abhydrol<br>ase_4; Thioesterase; BAAT_C;<br>FSH1 | 280 | 0           | 0 | NA       | NA                                |
| XAC4310 | XAC_RS21735 | NP_644604.1<br>cardiolipin<br>synthetase | AAM39140.1 | PLDc_2; PLDc                                                                                                                            | 407 | 244-<br>265 | 0 | xac00564 | Glycerophospholipid<br>metabolism |
| XAC2990 | XAC_RS15180 | NP_643299.1<br>hypothetical<br>protein   | AAM37835.1 | Lipase_3                                                                                                                                | 460 | 0           | 0 | NA       | NA                                |

|                 |             |                                                        |            |                                                                   |     |   |      |         |         |
|-----------------|-------------|--------------------------------------------------------|------------|-------------------------------------------------------------------|-----|---|------|---------|---------|
| ACU13_123<br>25 | ACU13_12325 | AKN93695.1<br>hypothetical<br>protein                  | AKN93695.1 | Unknown                                                           | 201 | 0 | 0    | Unknown | Unknown |
| XC_1740         | XC_RS08720  | YP_242825.1<br>hypothetical<br>protein                 | AAY48805.1 | LIP; Hydrolase_4; Abhydrolase_6; Peptidase_S9; Peptidase_S15; DLH | 376 | 0 | 0    | NA      | NA      |
| XCC0265         | XCC0265     | NP_635660.1<br>lipase                                  | AAM39584.1 | DUF732; Phage_int_SAM_1                                           | 91  | 0 | 1-19 | NA      | NA      |
| SB85_02285      | SB85_02285  | AJC44764.1<br>phospholipase                            | AJC44764   | PLDc_2; PLDc; PLDc_3; Regulator_TrnB; DUF1669                     | 426 | 0 | 1-33 | NA      | NA      |
| XAC3159         | XAC3159     | NP_643467.1<br>phospholipase<br>C                      | AAM38003.1 | Phosphoesterase; TAT_signal                                       | 201 | 0 | 1-29 | NA      | NA      |
| PXO_01547       | PXO_01547   | YP_00191437<br>5.1 Non-hemolytic<br>phospholipase<br>C | ACD59843.1 | Phosphoesterase; TAT_signal                                       | 220 | 0 | 1-28 | NA      | NA      |

\*COG1075: Predicted acetyltransferases and hydrolases with the alpha/beta hydrolase fold.

**Table S4.** LipA canonical residues analysis in different genomes.

| Strain                                   | Accession    | Model<br>(Fig. 2) | Size | Topology analysis |          |            |          |          | Canonical residues |      |             |
|------------------------------------------|--------------|-------------------|------|-------------------|----------|------------|----------|----------|--------------------|------|-------------|
|                                          |              |                   |      | Template          | Residues | Confidence | Coverage | Identity | S176               | D336 | H377        |
| Xac306                                   | WP_015462810 | 1                 | 421  | C3h2iA            | 382      | 100%       | 99%      | 87%      | 164                | 324  | 365         |
| Xcv8510                                  | WP_011346188 | 4                 | 420  | C3h2iA            | 387      | 100%       | 92%      | 87%      | 196                | 359  | 400         |
| XalbGPEPC73                              | WP_012917605 | 5                 | 421  | C3h2iA            | 387      | 100%       | 92%      | 70%      | 200                | 360  | 401         |
| Xyf9a5c-1                                | WP_010892890 | 6                 | 387  | C3h2iA            | 382      | 100%       | 99%      | 69%      | 165                | 325  | 367         |
| Xyf9a5c-3                                | WP_010894600 | 8                 | 424  | C3h2iA            | 383      | 100%       | 90%      | 61%      | 204                | 362  | 404         |
| Xfus4834                                 | WP_022558105 | 2                 | 420  | C3h2iA            | 387      | 100%       | 92%      | 88%      | 199                | 359  | 400         |
| XcamATCC33913                            | WP_011038080 | 3                 | 382  | C3h2iA            | 379      | 100%       | 99%      | 72%      | 163                | 321  | 362         |
| Xyf-9a5c-2                               | AAF83168     | 7                 | 385  | C3h2iA            | 380      | 100%       | 99%      | 62%      | 165                | 323  | 365         |
| <i>Burkholderia<br/>graminis</i>         | WP_006047192 | 9                 | 527  | C3h2iA            | 398      | 100%       | 74%      | 38%      | 222                | 431  | <b>A474</b> |
| <i>Pseudoduganella<br/>violaceinigra</i> | WP_051293673 | 10                | 513  | C3h2iA            | 388      | 100%       | 76%      | 30%      | 228                | 411  | <b>E449</b> |
| <i>Acidovorax<br/>delafieldii</i>        | WP_005799851 | 11                | 435  | C3h2iA            | 361      | 100%       | 83%      | 38%      | 195                | 355  | <b>P399</b> |

**Table S5.** Validation of the phytopathogen core genome using tblastn.

|             | Xanthomonas oryzae pv. oryzae MAFF 311018 | Xanthomonas oryzae pv. oryzicola YM15 | Xanthomonas translucens pv. undulosa Xtu 4699 | Xanthomonas citri pv. citri jx-6 | Xanthomonas oryzae pv. oryzicola CFBP2286 | Xanthomonas oryzae pv. oryzicola B8-12 | Xanthomonas oryzae pv. oryzicola BLS279 | Xanthomonas oryzae pv. oryzicola BXOR1 | Xanthomonas oryzae pv. oryzicola CFBP7331 | Xanthomonas oryzae pv. oryzicola CFBP7341 | Xanthomonas oryzae pv. oryzicola L8 |
|-------------|-------------------------------------------|---------------------------------------|-----------------------------------------------|----------------------------------|-------------------------------------------|----------------------------------------|-----------------------------------------|----------------------------------------|-------------------------------------------|-------------------------------------------|-------------------------------------|
| gene        | ASM1002v1                                 | ASM102191v1                           | ASM102193v1                                   | ASM102828v2                      | ASM104273v1                               | ASM104274v1                            | ASM104277v1                             | ASM104279v1                            | ASM104281v1                               | ASM104283v1                               | ASM104285v1                         |
| xac:XAC0435 | 239                                       | 237                                   | 123                                           | 255                              | 236                                       | 236                                    | 236                                     | 237                                    | 237                                       | 237                                       | 236                                 |
| xac:XAC0501 | 699                                       | 717                                   | 592                                           | 796                              | 716                                       | 716                                    | 716                                     | 717                                    | 717                                       | 717                                       | 716                                 |
| xac:XAC1306 | 1151                                      | 1146                                  | 1094                                          | 1176                             | 1153                                      | 1151                                   | 1151                                    | 1153                                   | 1153                                      | 1153                                      | 1151                                |
| xac:XAC3072 | 1035                                      | 1038                                  | 894                                           | 1076                             | 1036                                      | 1040                                   | 1040                                    | 1033                                   | 1038                                      | 1038                                      | 1040                                |
| xac:XAC3073 | 692                                       | 695                                   | 642                                           | 705                              | 696                                       | 696                                    | 696                                     | 691                                    | 692                                       | 692                                       | 696                                 |
| xac:XAC3084 | 1126                                      | 1132                                  | 911                                           | 1186                             | 1133                                      | 1131                                   | 1131                                    | 1132                                   | 1132                                      | 1132                                      | 1131                                |
| xac:XAC3647 | 325                                       | 325                                   | 230                                           | 347                              | 325                                       | 323                                    | 325                                     | 325                                    | 322                                       | 322                                       | 323                                 |
| gene        | ASM1002v1                                 | ASM102191v1                           | ASM102193v1                                   | ASM102828v2                      | ASM104273v1                               | ASM104274v1                            | ASM104277v1                             | ASM104279v1                            | ASM104281v1                               | ASM104283v1                               | ASM104285v1                         |
| xac:XAC0435 | 0,937254902                               | 0,929411765                           | 0,482352941                                   | 1                                | 0,925490196                               | 0,925490196                            | 0,925490196                             | 0,929411765                            | 0,929411765                               | 0,929411765                               | 0,925490196                         |
| xac:XAC0501 | 0,878140704                               | 0,900753769                           | 0,743718593                                   | 1                                | 0,899497487                               | 0,899497487                            | 0,899497487                             | 0,900753769                            | 0,900753769                               | 0,900753769                               | 0,899497487                         |
| xac:XAC1306 | 0,978741497                               | 0,974489796                           | 0,930272109                                   | 1                                | 0,980442177                               | 0,978741497                            | 0,978741497                             | 0,980442177                            | 0,980442177                               | 0,980442177                               | 0,978741497                         |
| xac:XAC3072 | 0,961895911                               | 0,964684015                           | 0,830855019                                   | 1                                | 0,962825279                               | 0,966542751                            | 0,966542751                             | 0,960037175                            | 0,964684015                               | 0,964684015                               | 0,966542751                         |
| xac:XAC3073 | 0,981560284                               | 0,985815603                           | 0,910638298                                   | 1                                | 0,987234043                               | 0,987234043                            | 0,987234043                             | 0,980141844                            | 0,981560284                               | 0,981560284                               | 0,987234043                         |
| xac:XAC3084 | 0,949409781                               | 0,954468803                           | 0,768128162                                   | 1                                | 0,955311973                               | 0,953625632                            | 0,953625632                             | 0,954468803                            | 0,954468803                               | 0,954468803                               | 0,953625632                         |
| xac:XAC3647 | 0,936599424                               | 0,936599424                           | 0,662824207                                   | 1                                | 0,936599424                               | 0,930835735                            | 0,936599424                             | 0,936599424                            | 0,92795389                                | 0,92795389                                | 0,930835735                         |
|             | Xanthomonas oryzae pv. oryzae MAFF 311018 | Xanthomonas oryzae pv. oryzicola YM15 | Xanthomonas translucens pv. undulosa Xtu 4699 | Xanthomonas citri pv. citri jx-6 | Xanthomonas oryzae pv. oryzicola CFBP2286 | Xanthomonas oryzae pv. oryzicola B8-12 | Xanthomonas oryzae pv. oryzicola BLS279 | Xanthomonas oryzae pv. oryzicola BXOR1 | Xanthomonas oryzae pv. oryzicola CFBP7331 | Xanthomonas oryzae pv. oryzicola CFBP7341 | Xanthomonas oryzae pv. oryzicola L8 |

|                                                      |                                                                |                                                               |                                                               |                                            |                                            |                                             |                                                          |                                                          |                                                       |                                          |                               |
|------------------------------------------------------|----------------------------------------------------------------|---------------------------------------------------------------|---------------------------------------------------------------|--------------------------------------------|--------------------------------------------|---------------------------------------------|----------------------------------------------------------|----------------------------------------------------------|-------------------------------------------------------|------------------------------------------|-------------------------------|
| <i>Xanthomonas oryzae</i> pv. <i>oryzicola</i> RS105 | <i>Xanthomonas campestris</i> pv. <i>campestris</i> ICMP 21080 | <i>Xanthomonas campestris</i> pv. <i>campestris</i> ICMP 4013 | <i>Xanthomonas campestris</i> pv. <i>campestris</i> str. 8004 | <i>Stenotrophomonas maltophilia</i> ISMMS3 | <i>Stenotrophomonas maltophilia</i> ISMMS2 | <i>Stenotrophomonas maltophilia</i> ISMMS2R | <i>Stenotrophomonas acidaminiphila</i> ZAC14D2_NAI M14_2 | <i>Xylella fastidiosa</i> subsp. <i>fastidiosa</i> GB514 | <i>Xanthomonas oryzae</i> pv. <i>oryzicola</i> BLS256 | <i>Pseudoxanthomonas suwonensis</i> 11-1 | <i>Xylella fastidiosa</i> M12 |
| ASM104287v1                                          | ASM118641v1                                                    | ASM118646v1                                                   | ASM1210v1                                                     | ASM127459v1                                | ASM127465v1                                | ASM127467v1                                 | ASM131430v1                                              | ASM14840v1                                               | ASM16831v3                                            | ASM18596v1                               | ASM1932v1                     |
| 236                                                  | 218                                                            | 219                                                           | 219                                                           | 0                                          | 0                                          | 0                                           | 0                                                        | 103                                                      | 236                                                   | 0                                        | 105                           |
| 716                                                  | 583                                                            | 583                                                           | 583                                                           | 0                                          | 0                                          | 0                                           | 0                                                        | 561                                                      | 716                                                   | 0                                        | 563                           |
| 1151                                                 | 1138                                                           | 1138                                                          | 1138                                                          | 0                                          | 0                                          | 0                                           | 0                                                        | 237                                                      | 1153                                                  | 0                                        | 239                           |
| 1040                                                 | 1010                                                           | 1011                                                          | 1011                                                          | 0                                          | 0                                          | 0                                           | 0                                                        | 822                                                      | 1040                                                  | 0                                        | 827                           |
| 696                                                  | 669                                                            | 669                                                           | 671                                                           | 0                                          | 0                                          | 0                                           | 0                                                        | 528                                                      | 696                                                   | 0                                        | 525                           |
| 1131                                                 | 1083                                                           | 1088                                                          | 1083                                                          | 0                                          | 0                                          | 0                                           | 0                                                        | 852                                                      | 1133                                                  | 0                                        | 846                           |
| 323                                                  | 272                                                            | 266                                                           | 266                                                           | 0                                          | 0                                          | 0                                           | 0                                                        | 203                                                      | 325                                                   | 0                                        | 199                           |
|                                                      |                                                                |                                                               |                                                               |                                            |                                            |                                             |                                                          |                                                          |                                                       |                                          |                               |
| ASM104287v1                                          | ASM118641v1                                                    | ASM118646v1                                                   | ASM1210v1                                                     | ASM127459v1                                | ASM127465v1                                | ASM127467v1                                 | ASM131430v1                                              | ASM14840v1                                               | ASM16831v3                                            | ASM18596v1                               | ASM1932v1                     |
| 0,925490196                                          | 0,854901961                                                    | 0,858823529                                                   | 0,858823529                                                   | 0                                          | 0                                          | 0                                           | 0                                                        | 0,403921569                                              | 0,925490196                                           | 0                                        | 0,411764706                   |
| 0,899497487                                          | 0,73241206                                                     | 0,73241206                                                    | 0,73241206                                                    | 0                                          | 0                                          | 0                                           | 0                                                        | 0,704773869                                              | 0,899497487                                           | 0                                        | 0,707286432                   |
| 0,978741497                                          | 0,967687075                                                    | 0,967687075                                                   | 0,967687075                                                   | 0                                          | 0                                          | 0                                           | 0                                                        | 0,201530612                                              | 0,980442177                                           | 0                                        | 0,203231293                   |
| 0,966542751                                          | 0,93866171                                                     | 0,939591078                                                   | 0,939591078                                                   | 0                                          | 0                                          | 0                                           | 0                                                        | 0,76394052                                               | 0,966542751                                           | 0                                        | 0,768587361                   |
| 0,987234043                                          | 0,94893617                                                     | 0,94893617                                                    | 0,95177305                                                    | 0                                          | 0                                          | 0                                           | 0                                                        | 0,74893617                                               | 0,987234043                                           | 0                                        | 0,744680851                   |
| 0,953625632                                          | 0,913153457                                                    | 0,917369309                                                   | 0,913153457                                                   | 0                                          | 0                                          | 0                                           | 0                                                        | 0,718381113                                              | 0,955311973                                           | 0                                        | 0,713322091                   |
| 0,930835735                                          | 0,783861671                                                    | 0,766570605                                                   | 0,766570605                                                   | 0                                          | 0                                          | 0                                           | 0                                                        | 0,585014409                                              | 0,936599424                                           | 0                                        | 0,573487032                   |
| <i>Xanthomonas oryzae</i> pv. <i>oryzicola</i> RS105 | <i>Xanthomonas campestris</i> pv. <i>campestris</i> ICMP 21080 | <i>Xanthomonas campestris</i> pv. <i>campestris</i> ICMP 4013 | <i>Xanthomonas campestris</i> pv. <i>campestris</i> str. 8004 | <i>Stenotrophomonas maltophilia</i> ISMMS3 | <i>Stenotrophomonas maltophilia</i> ISMMS2 | <i>Stenotrophomonas maltophilia</i> ISMMS2R | <i>Stenotrophomonas acidaminiphila</i> ZAC14D2_NAIM14_2  | <i>Xylella fastidiosa</i> subsp. <i>fastidiosa</i> GB514 | <i>Xanthomonas oryzae</i> pv. <i>oryzicola</i> BLS256 | <i>Pseudoxanthomonas suwonensis</i> 11-1 | <i>Xylella fastidiosa</i> M12 |

| Xanthomonas<br>oryzae pv. oryzae<br>PXO99A | Xylella fastidiosa<br>M23 | Stenotrophomonas<br>maltophilia R551-3 | Xanthomonas<br>campestris pv.<br>raphani 756C | Stenotrophomonas<br>maltophilia JV3 | Xanthomonas<br>axonopodis pv.<br>citrumelo F1 | Pseudoxanthomonas<br>spadix BD-a59 | Stenotrophomonas<br>maltophilia D457 | Xanthomonas<br>axonopodis Xac29-<br>1 | Xanthomonas citri<br>subsp. citri<br>Aw12879 | Xylella fastidiosa<br>9a5c | Xylella fastidiosa<br>subsp. sandyi Ann-<br>1 |
|--------------------------------------------|---------------------------|----------------------------------------|-----------------------------------------------|-------------------------------------|-----------------------------------------------|------------------------------------|--------------------------------------|---------------------------------------|----------------------------------------------|----------------------------|-----------------------------------------------|
| ASM1958v2                                  | ASM1976v1                 | ASM2066v1                              | ASM22196v<br>1                                | ASM22388<br>v1                      | ASM22591v<br>1                                | ASM23391v4                         | ASM28459v1                           | ASM34858v1                            | ASM34922v1                                   | ASM672v1                   | ASM69880v<br>1                                |
| 239                                        | 103                       | 0                                      | 216                                           | 0                                   | 253                                           | 0                                  | 0                                    | 255                                   | 255                                          | 108                        | 103                                           |
| 699                                        | 568                       | 0                                      | 578                                           | 0                                   | 768                                           | 0                                  | 0                                    | 796                                   | 796                                          | 575                        | 582                                           |
| 1150                                       | 237                       | 0                                      | 1127                                          | 0                                   | 1157                                          | 0                                  | 0                                    | 1176                                  | 1172                                         | 238                        | 238                                           |
| 1037                                       | 822                       | 0                                      | 1012                                          | 0                                   | 1051                                          | 0                                  | 0                                    | 1076                                  | 1073                                         | 519                        | 823                                           |
| 696                                        | 528                       | 0                                      | 668                                           | 0                                   | 699                                           | 0                                  | 0                                    | 705                                   | 705                                          | 532                        | 535                                           |
| 1126                                       | 852                       | 0                                      | 1079                                          | 0                                   | 1140                                          | 0                                  | 0                                    | 1186                                  | 1186                                         | 856                        | 844                                           |
| 325                                        | 203                       | 0                                      | 271                                           | 0                                   | 337                                           | 0                                  | 0                                    | 347                                   | 347                                          | 204                        | 201                                           |
| ASM1958v2                                  | ASM1976v1                 | ASM2066v1                              | ASM22196v<br>1                                | ASM22388<br>v1                      | ASM22591v<br>1                                | ASM23391v4                         | ASM28459v1                           | ASM34858v1                            | ASM34922v1                                   | ASM672v1                   | ASM69880v<br>1                                |
| 0,937254902                                | 0,403921569               | 0                                      | 0,847058824                                   | 0                                   | 0,992156863                                   | 0                                  | 0                                    | 1                                     | 1                                            | 0,423529412                | 0,403921569                                   |
| 0,878140704                                | 0,713567839               | 0                                      | 0,726130653                                   | 0                                   | 0,964824121                                   | 0                                  | 0                                    | 1                                     | 1                                            | 0,722361809                | 0,731155779                                   |
| 0,977891156                                | 0,201530612               | 0                                      | 0,958333333                                   | 0                                   | 0,983843537                                   | 0                                  | 0                                    | 1                                     | 0,996598639                                  | 0,202380952                | 0,202380952                                   |
| 0,963754647                                | 0,76394052                | 0                                      | 0,940520446                                   | 0                                   | 0,976765799                                   | 0                                  | 0                                    | 1                                     | 0,997211896                                  | 0,482342007                | 0,764869888                                   |
| 0,987234043                                | 0,74893617                | 0                                      | 0,94751773                                    | 0                                   | 0,991489362                                   | 0                                  | 0                                    | 1                                     | 1                                            | 0,754609929                | 0,758865248                                   |
| 0,949409781                                | 0,718381113               | 0                                      | 0,909780776                                   | 0                                   | 0,961214165                                   | 0                                  | 0                                    | 1                                     | 1                                            | 0,721753794                | 0,71163575                                    |
| 0,936599424                                | 0,585014409               | 0                                      | 0,780979827                                   | 0                                   | 0,971181556                                   | 0                                  | 0                                    | 1                                     | 1                                            | 0,587896254                | 0,57925072                                    |
| Xanthomonas oryzae<br>pv. oryzae PXO99A    | Xylella fastidiosa M23    | Stenotrophomonas<br>maltophilia R551-3 | Xanthomonas<br>campestris pv. raphani<br>756C | Stenotrophomonas<br>maltophilia JV3 | Xanthomonas<br>axonopodis pv.<br>citrumelo F1 | Pseudoxanthomonas<br>spadix BD-a59 | Stenotrophomonas<br>maltophilia D457 | Xanthomonas<br>axonopodis Xac29-1     | Xanthomonas citri<br>subsp. citri Aw12879    | Xylella fastidiosa 9a5c    | Xylella fastidiosa<br>subsp. sandyi Ann-1     |

|                               |                                                  |                                                                |                                                 |                                       |                                 |                                                |                            |                                        |                                     |                                                         |                                                 |
|-------------------------------|--------------------------------------------------|----------------------------------------------------------------|-------------------------------------------------|---------------------------------------|---------------------------------|------------------------------------------------|----------------------------|----------------------------------------|-------------------------------------|---------------------------------------------------------|-------------------------------------------------|
| Xylella fastidiosa<br>MUL0034 | Xanthomonas<br>campestris pv.<br>campestris B100 | Xanthomonas<br>campestris pv.<br>campestris str. ATCC<br>33913 | Xanthomonas<br>axonopodis pv. citri str.<br>306 | Stenotrophomonas<br>maltophilia K279a | Xylella fastidiosa<br>Temeculal | Xanthomonas oryzae pv.<br>oryzae KACC 10331    | Xanthomonas sacchari<br>R1 | Xanthomonas citri<br>subsp. citri A306 | Xanthomonas<br>albilineans GPE PC73 | Xanthomonas<br>campestris pv.<br>vesicatoria str. 85-10 | Xanthomonas oryzae pv.<br>oryzicola CFBP7342    |
| ASM69882v1                    | ASM7060v1                                        | ASM714v1                                                       | ASM716<br>v1                                    | ASM7248v1                             | ASM724v1                        | ASM738v1                                       | ASM81518v1                 | ASM81688v1                             | ASM8796v1                           | ASM916v1                                                | ASM94082v1                                      |
| 103                           | 219                                              | 219                                                            | 255                                             | 0                                     | 103                             | 239                                            | 137                        | 255                                    | 134                                 | 255                                                     | 237                                             |
| 575                           | 583                                              | 583                                                            | 796                                             | 0                                     | 568                             | 699                                            | 580                        | 796                                    | 561                                 | 763                                                     | 717                                             |
| 238                           | 1138                                             | 1138                                                           | 1176                                            | 0                                     | 237                             | 1151                                           | 1109                       | 1176                                   | 235                                 | 1154                                                    | 1153                                            |
| 821                           | 1011                                             | 1011                                                           | 1076                                            | 0                                     | 822                             | 1037                                           | 905                        | 1076                                   | 877                                 | 1031                                                    | 1035                                            |
| 525                           | 671                                              | 671                                                            | 705                                             | 0                                     | 528                             | 696                                            | 632                        | 705                                    | 625                                 | 682                                                     | 695                                             |
| 854                           | 1088                                             | 1085                                                           | 1186                                            | 0                                     | 852                             | 1126                                           | 940                        | 1186                                   | 890                                 | 1144                                                    | 1132                                            |
| 200                           | 272                                              | 266                                                            | 347                                             | 0                                     | 203                             | 321                                            | 251                        | 347                                    | 238                                 | 336                                                     | 325                                             |
|                               |                                                  |                                                                |                                                 |                                       |                                 |                                                |                            |                                        |                                     |                                                         |                                                 |
| ASM69882v1                    | ASM7060v1                                        | ASM714v1                                                       | ASM716<br>v1                                    | ASM7248v1                             | ASM724v1                        | ASM738v1                                       | ASM81518v1                 | ASM81688v1                             | ASM8796v1                           | ASM916v1                                                | ASM94082v1                                      |
| 0,403921569                   | 0,858823529                                      | 0,858823529                                                    | 1                                               | 0                                     | 0,403921569                     | 0,937254902                                    | 0,537254902                | 1                                      | 0,525490196                         | 1                                                       | 0,929411765                                     |
| 0,722361809                   | 0,73241206                                       | 0,73241206                                                     | 1                                               | 0                                     | 0,713567839                     | 0,878140704                                    | 0,728643216                | 1                                      | 0,704773869                         | 0,958542714                                             | 0,900753769                                     |
| 0,202380952                   | 0,967687075                                      | 0,967687075                                                    | 1                                               | 0                                     | 0,201530612                     | 0,978741497                                    | 0,943027211                | 1                                      | 0,199829932                         | 0,981292517                                             | 0,980442177                                     |
| 0,763011152                   | 0,939591078                                      | 0,939591078                                                    | 1                                               | 0                                     | 0,76394052                      | 0,963754647                                    | 0,841078067                | 1                                      | 0,815055762                         | 0,958178439                                             | 0,961895911                                     |
| 0,744680851                   | 0,95177305                                       | 0,95177305                                                     | 1                                               | 0                                     | 0,74893617                      | 0,987234043                                    | 0,896453901                | 1                                      | 0,886524823                         | 0,967375887                                             | 0,985815603                                     |
| 0,720067454                   | 0,917369309                                      | 0,914839798                                                    | 1                                               | 0                                     | 0,718381113                     | 0,949409781                                    | 0,792580101                | 1                                      | 0,750421585                         | 0,964586847                                             | 0,954468803                                     |
| 0,576368876                   | 0,783861671                                      | 0,766570605                                                    | 1                                               | 0                                     | 0,585014409                     | 0,925072046                                    | 0,723342939                | 1                                      | 0,685878963                         | 0,968299712                                             | 0,936599424                                     |
| Xylella fastidiosa<br>MUL0034 | Xanthomonas<br>campestris pv.<br>campestris B100 | Xanthomonas<br>campestris pv.<br>campestris str. ATCC<br>33913 | Xanthomonas<br>axonopodis pv. citri<br>str. 306 | Stenotrophomonas<br>maltophilia K279a | Xylella fastidiosa<br>Temeculal | Xanthomonas oryzae<br>pv. oryzae KACC<br>10331 | Xanthomonas sacchari<br>R1 | Xanthomonas citri<br>subsp. citri A306 | Xanthomonas<br>albilineans GPE PC73 | Xanthomonas<br>campestris pv.<br>vesicatoria str. 85-10 | Xanthomonas oryzae<br>pv. oryzicola<br>CFBP7342 |



|                                     |                                    |                                    |                                     |                                     |                                     |                                     |                                     |                                    |                                    |                                    |                                    |
|-------------------------------------|------------------------------------|------------------------------------|-------------------------------------|-------------------------------------|-------------------------------------|-------------------------------------|-------------------------------------|------------------------------------|------------------------------------|------------------------------------|------------------------------------|
| Xanthomonas oryzae pv. oryzae PXO86 | Xanthomonas citri subsp. citri UI7 | Xanthomonas citri subsp. citri UI6 | Xanthomonas citri subsp. citri NT17 | Xanthomonas citri subsp. citri MN12 | Xanthomonas citri subsp. citri MN11 | Xanthomonas citri subsp. citri MN10 | Xanthomonas citri subsp. citri mf20 | Xanthomonas citri subsp. citri jx5 | Xanthomonas citri subsp. citri jx4 | Xanthomonas citri subsp. citri gd3 | Xanthomonas citri subsp. citri gd2 |
| ASM94807v1                          | ASM96115v1                         | ASM96117v1                         | ASM96119v1                          | ASM96121v1                          | ASM96123v1                          | ASM96125v1                          | ASM96127v1                          | ASM96129v1                         | ASM96131v1                         | ASM96133v1                         | ASM96135v1                         |
| 239                                 | 255                                | 255                                | 255                                 | 255                                 | 255                                 | 255                                 | 255                                 | 255                                | 255                                | 255                                | 255                                |
| 699                                 | 796                                | 796                                | 796                                 | 796                                 | 796                                 | 796                                 | 796                                 | 796                                | 796                                | 795                                | 795                                |
| 1151                                | 1176                               | 1176                               | 1176                                | 1176                                | 1176                                | 1176                                | 1176                                | 1176                               | 1176                               | 1176                               | 1176                               |
| 1035                                | 1076                               | 1076                               | 1076                                | 1076                                | 1076                                | 1076                                | 1076                                | 1076                               | 1076                               | 1076                               | 1076                               |
| 696                                 | 705                                | 705                                | 705                                 | 705                                 | 705                                 | 705                                 | 705                                 | 705                                | 705                                | 705                                | 705                                |
| 1126                                | 1186                               | 1186                               | 1186                                | 1186                                | 1186                                | 1186                                | 1186                                | 1186                               | 1186                               | 1186                               | 1186                               |
| 321                                 | 347                                | 347                                | 347                                 | 347                                 | 347                                 | 347                                 | 347                                 | 347                                | 347                                | 347                                | 347                                |
|                                     |                                    |                                    |                                     |                                     |                                     |                                     |                                     |                                    |                                    |                                    |                                    |
| ASM94807v1                          | ASM96115v1                         | ASM96117v1                         | ASM96119v1                          | ASM96121v1                          | ASM96123v1                          | ASM96125v1                          | ASM96127v1                          | ASM96129v1                         | ASM96131v1                         | ASM96133v1                         | ASM96135v1                         |
| 0,937254902                         | 1                                  | 1                                  | 1                                   | 1                                   | 1                                   | 1                                   | 1                                   | 1                                  | 1                                  | 1                                  | 1                                  |
| 0,878140704                         | 1                                  | 1                                  | 1                                   | 1                                   | 1                                   | 1                                   | 1                                   | 1                                  | 1                                  | 0,998743719                        | 0,998743719                        |
| 0,978741497                         | 1                                  | 1                                  | 1                                   | 1                                   | 1                                   | 1                                   | 1                                   | 1                                  | 1                                  | 1                                  | 1                                  |
| 0,961895911                         | 1                                  | 1                                  | 1                                   | 1                                   | 1                                   | 1                                   | 1                                   | 1                                  | 1                                  | 1                                  | 1                                  |
| 0,987234043                         | 1                                  | 1                                  | 1                                   | 1                                   | 1                                   | 1                                   | 1                                   | 1                                  | 1                                  | 1                                  | 1                                  |
| 0,949409781                         | 1                                  | 1                                  | 1                                   | 1                                   | 1                                   | 1                                   | 1                                   | 1                                  | 1                                  | 1                                  | 1                                  |
| 0,925072046                         | 1                                  | 1                                  | 1                                   | 1                                   | 1                                   | 1                                   | 1                                   | 1                                  | 1                                  | 1                                  | 1                                  |
| Xanthomonas oryzae pv. oryzae PXO86 | Xanthomonas citri subsp. citri UI7 | Xanthomonas citri subsp. citri UI6 | Xanthomonas citri subsp. citri NT17 | Xanthomonas citri subsp. citri MN12 | Xanthomonas citri subsp. citri MN11 | Xanthomonas citri subsp. citri MN10 | Xanthomonas citri subsp. citri mf20 | Xanthomonas citri subsp. citri jx5 | Xanthomonas citri subsp. citri jx4 | Xanthomonas citri subsp. citri gd3 | Xanthomonas citri subsp. citri gd2 |

|                                     |                                     |                                     |                                     |                                     |                                     |                                     |                                           |                           |                                 |
|-------------------------------------|-------------------------------------|-------------------------------------|-------------------------------------|-------------------------------------|-------------------------------------|-------------------------------------|-------------------------------------------|---------------------------|---------------------------------|
| Xanthomonas citri subsp. citri FB19 | Xanthomonas citri subsp. citri BL18 | Xanthomonas citri subsp. citri 5208 | Xanthomonas citri subsp. citri AW13 | Xanthomonas citri subsp. citri AW14 | Xanthomonas citri subsp. citri AW15 | Xanthomonas citri subsp. citri AW16 | Xanthomonas fuscans subsp. fuscans 4834-R | Xanthomonas campestris 17 | Pseudoxanthomonas suwonensis J1 |
| ASM96137v1                          | ASM96139v1                          | ASM96141v1                          | ASM96143v1                          | ASM96145v1                          | ASM96147v1                          | ASM96149v1                          | ASM96968v1                                | ASM97274v1                | ASM97286v1                      |
| 255                                 | 255                                 | 255                                 | 255                                 | 255                                 | 255                                 | 255                                 | 253                                       | 222                       | 0                               |
| 796                                 | 796                                 | 796                                 | 796                                 | 796                                 | 796                                 | 796                                 | 784                                       | 706                       | 0                               |
| 1176                                | 1176                                | 1176                                | 1175                                | 1175                                | 1175                                | 1175                                | 1154                                      | 1153                      | 0                               |
| 1076                                | 1076                                | 1076                                | 1073                                | 1073                                | 1073                                | 1073                                | 1053                                      | 1004                      | 0                               |
| 705                                 | 705                                 | 705                                 | 705                                 | 705                                 | 705                                 | 705                                 | 701                                       | 682                       | 0                               |
| 1186                                | 1186                                | 1186                                | 1186                                | 1186                                | 1186                                | 1186                                | 1165                                      | 1086                      | 0                               |
| 347                                 | 347                                 | 347                                 | 347                                 | 347                                 | 347                                 | 347                                 | 339                                       | 260                       | 0                               |
|                                     |                                     |                                     |                                     |                                     |                                     |                                     |                                           |                           |                                 |
| ASM96137v1                          | ASM96139v1                          | ASM96141v1                          | ASM96143v1                          | ASM96145v1                          | ASM96147v1                          | ASM96149v1                          | ASM96968v1                                | ASM97274v1                | ASM97286v1                      |
| 1                                   | 1                                   | 1                                   | 1                                   | 1                                   | 1                                   | 1                                   | 0,992156863                               | 0,870588235               | 0                               |
| 1                                   | 1                                   | 1                                   | 1                                   | 1                                   | 1                                   | 1                                   | 0,984924623                               | 0,886934673               | 0                               |
| 1                                   | 1                                   | 1                                   | 0,99914966                          | 0,99914966                          | 0,99914966                          | 0,99914966                          | 0,981292517                               | 0,980442177               | 0                               |
| 1                                   | 1                                   | 1                                   | 0,997211896                         | 0,997211896                         | 0,997211896                         | 0,997211896                         | 0,978624535                               | 0,933085502               | 0                               |
| 1                                   | 1                                   | 1                                   | 1                                   | 1                                   | 1                                   | 1                                   | 0,994326241                               | 0,967375887               | 0                               |
| 1                                   | 1                                   | 1                                   | 1                                   | 1                                   | 1                                   | 1                                   | 0,982293423                               | 0,915682968               | 0                               |
| 1                                   | 1                                   | 1                                   | 1                                   | 1                                   | 1                                   | 1                                   | 0,976945245                               | 0,749279539               | 0                               |
| Xanthomonas citri subsp. citri FB19 | Xanthomonas citri subsp. citri BL18 | Xanthomonas citri subsp. citri 5208 | Xanthomonas citri subsp. citri AW13 | Xanthomonas citri subsp. citri AW14 | Xanthomonas citri subsp. citri AW15 | Xanthomonas citri subsp. citri AW16 | Xanthomonas fuscans subsp. fuscans 4834-R | Xanthomonas campestris 17 | Pseudoxanthomonas suwonensis J1 |



## Supplementary Figures

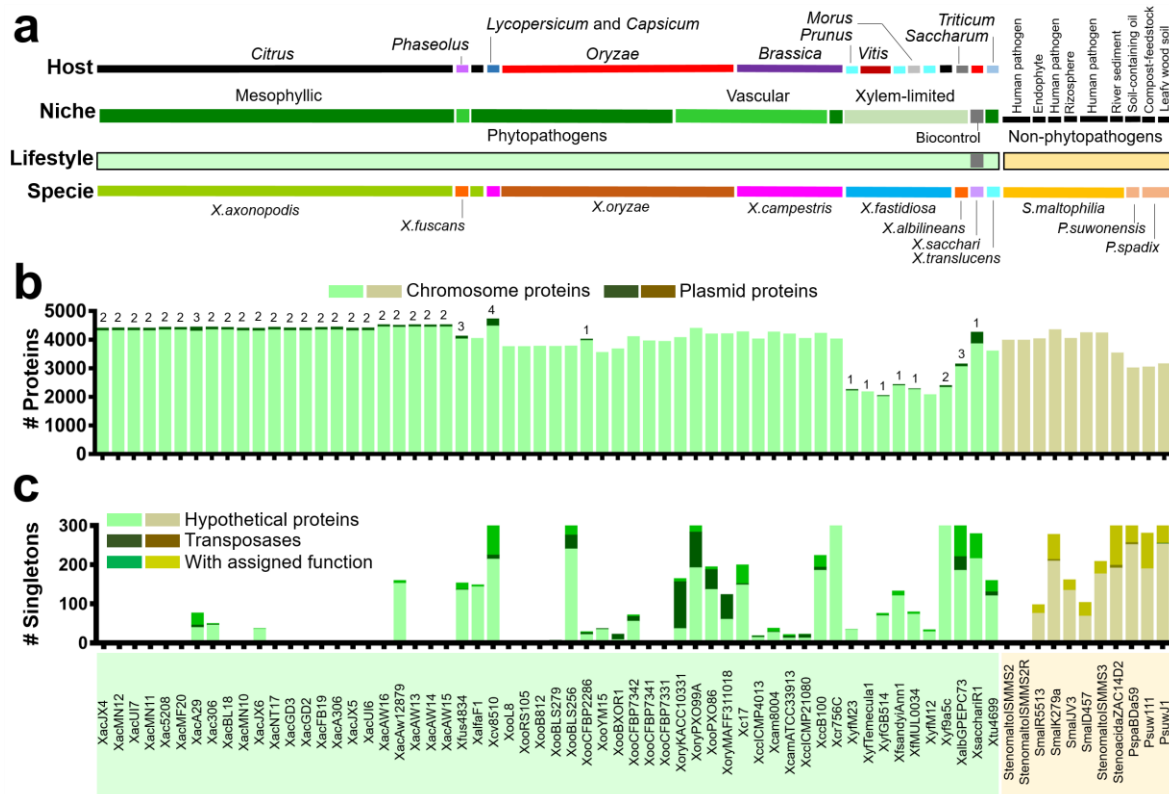

**Fig. S1.** Comparative genomics of the 69 selected strains. (a) General information about each strain classified into phytopathogens (green) and non-phytopathogens (brown). (b) Number of chromosome and plasmid proteins of respective strain. Numbers above the bars indicate number of plasmids in each strain. (c) Number of singletons per genome classified into three annotation categories.

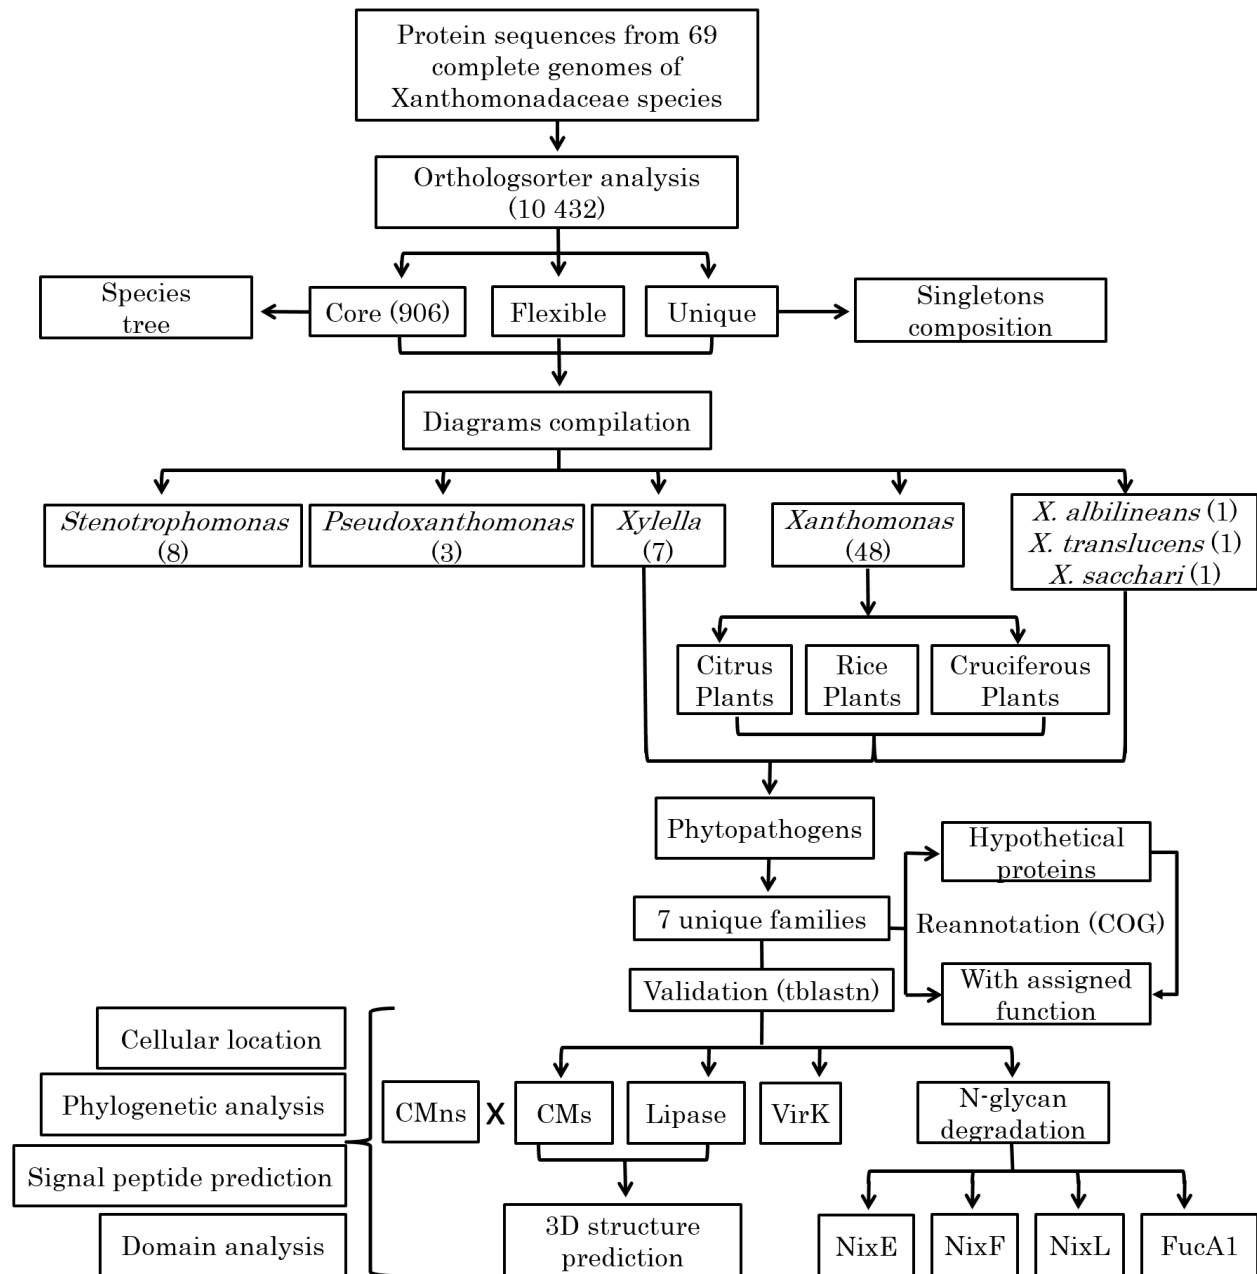

**Fig. S2.** Flowchart of analytical steps involved in this work.

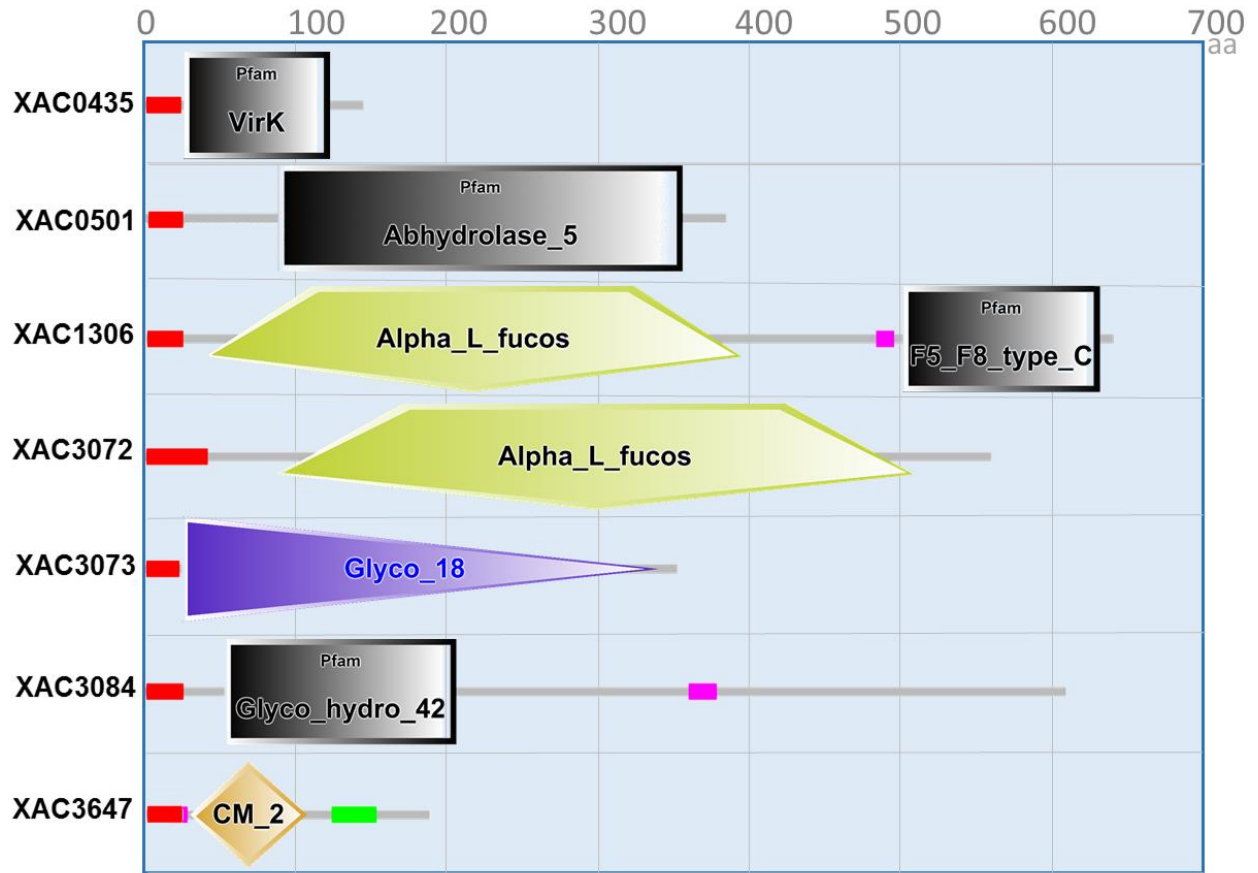

**Fig. S3.** Domain composition analysis of the seven proteins families using Xac306 as reference.

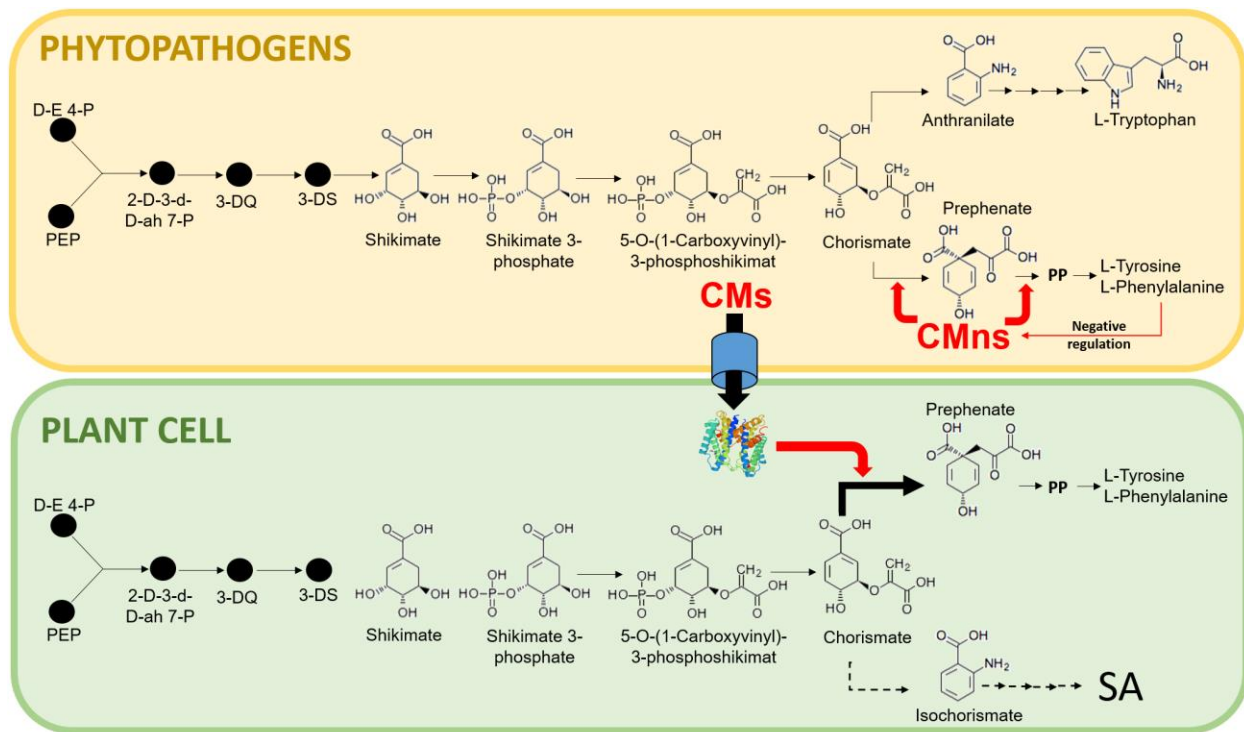

**Fig. S4.** Shikimate pathway highlighting the possible reactions catalyzed by *CM-sec* and *CM-nonsec* in the metabolism of plants and phytopathogens.

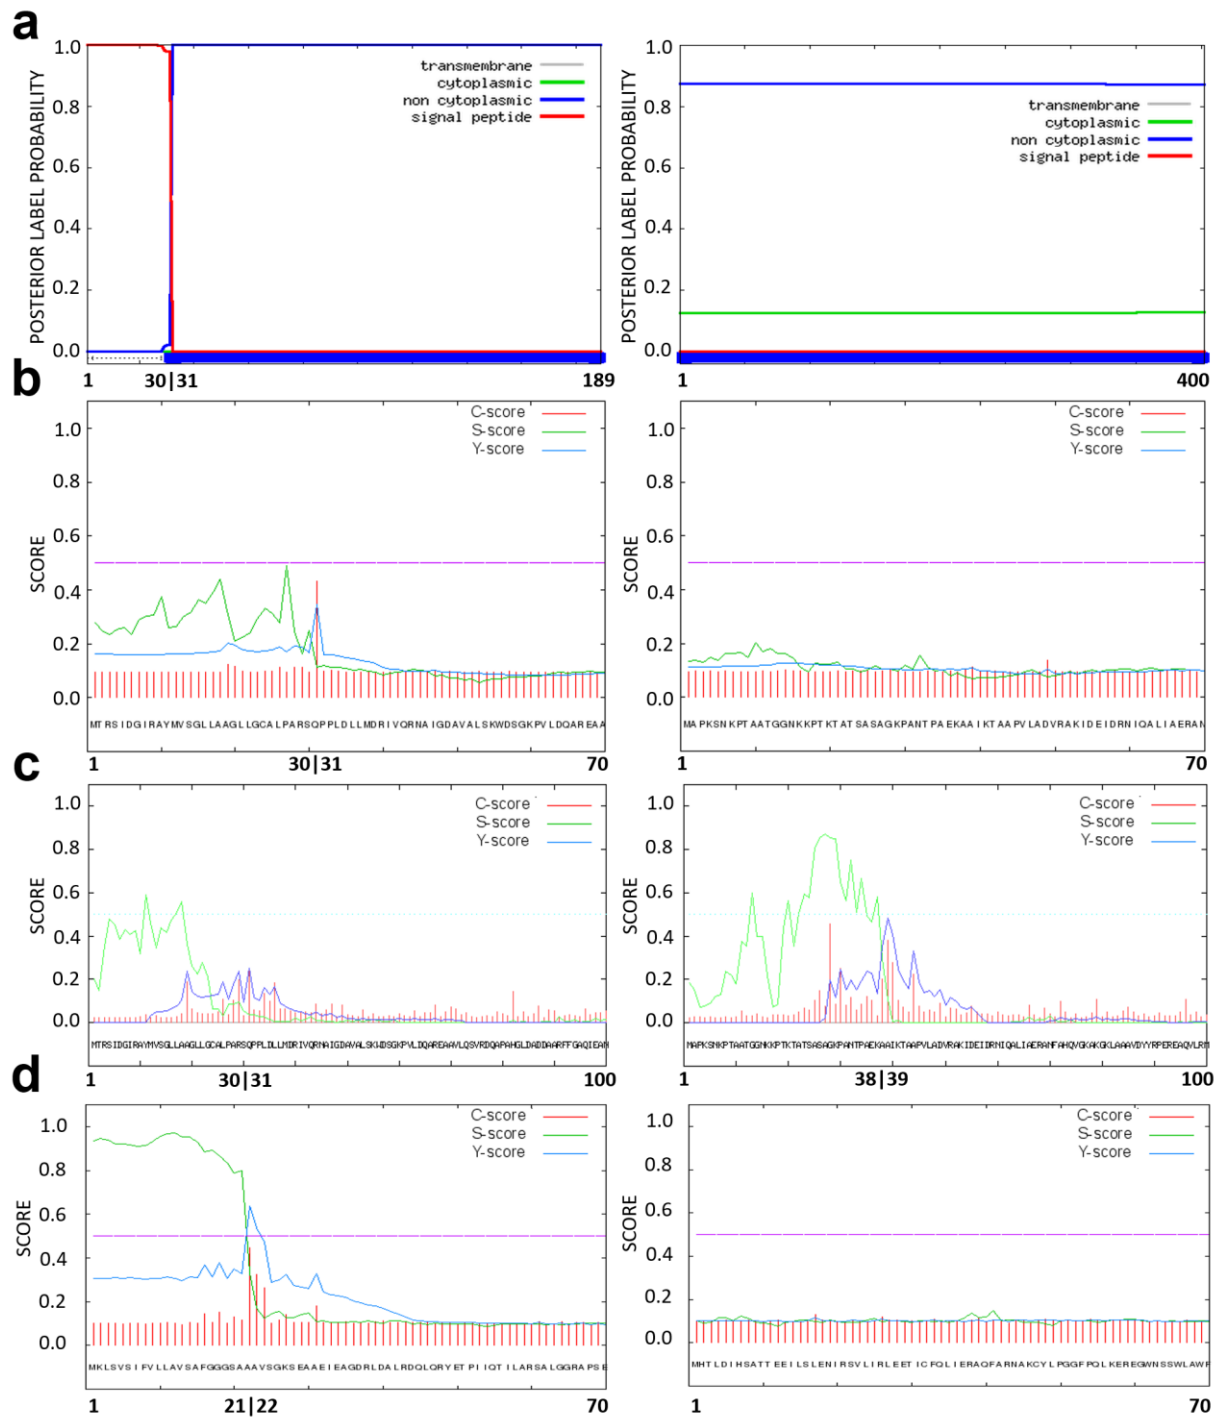

Fig. S5. Signal peptide prediction of CM-sec and CM-nonsec.



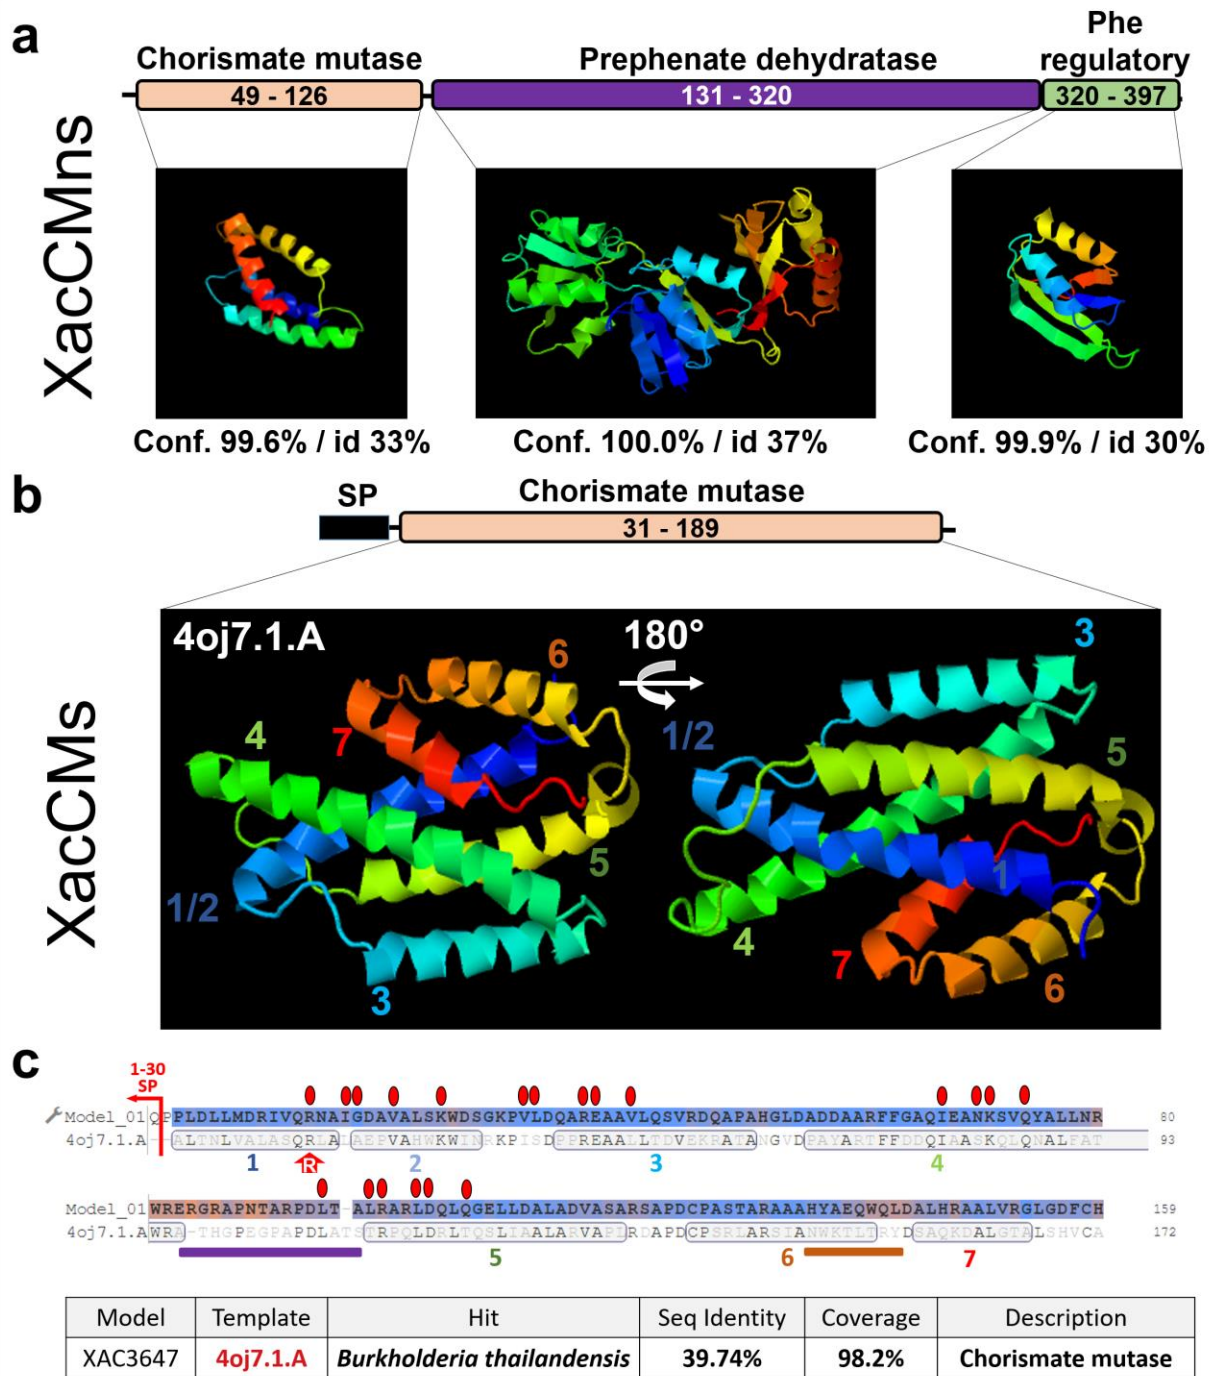

Fig. S6. Structural analysis of chorismate mutase.

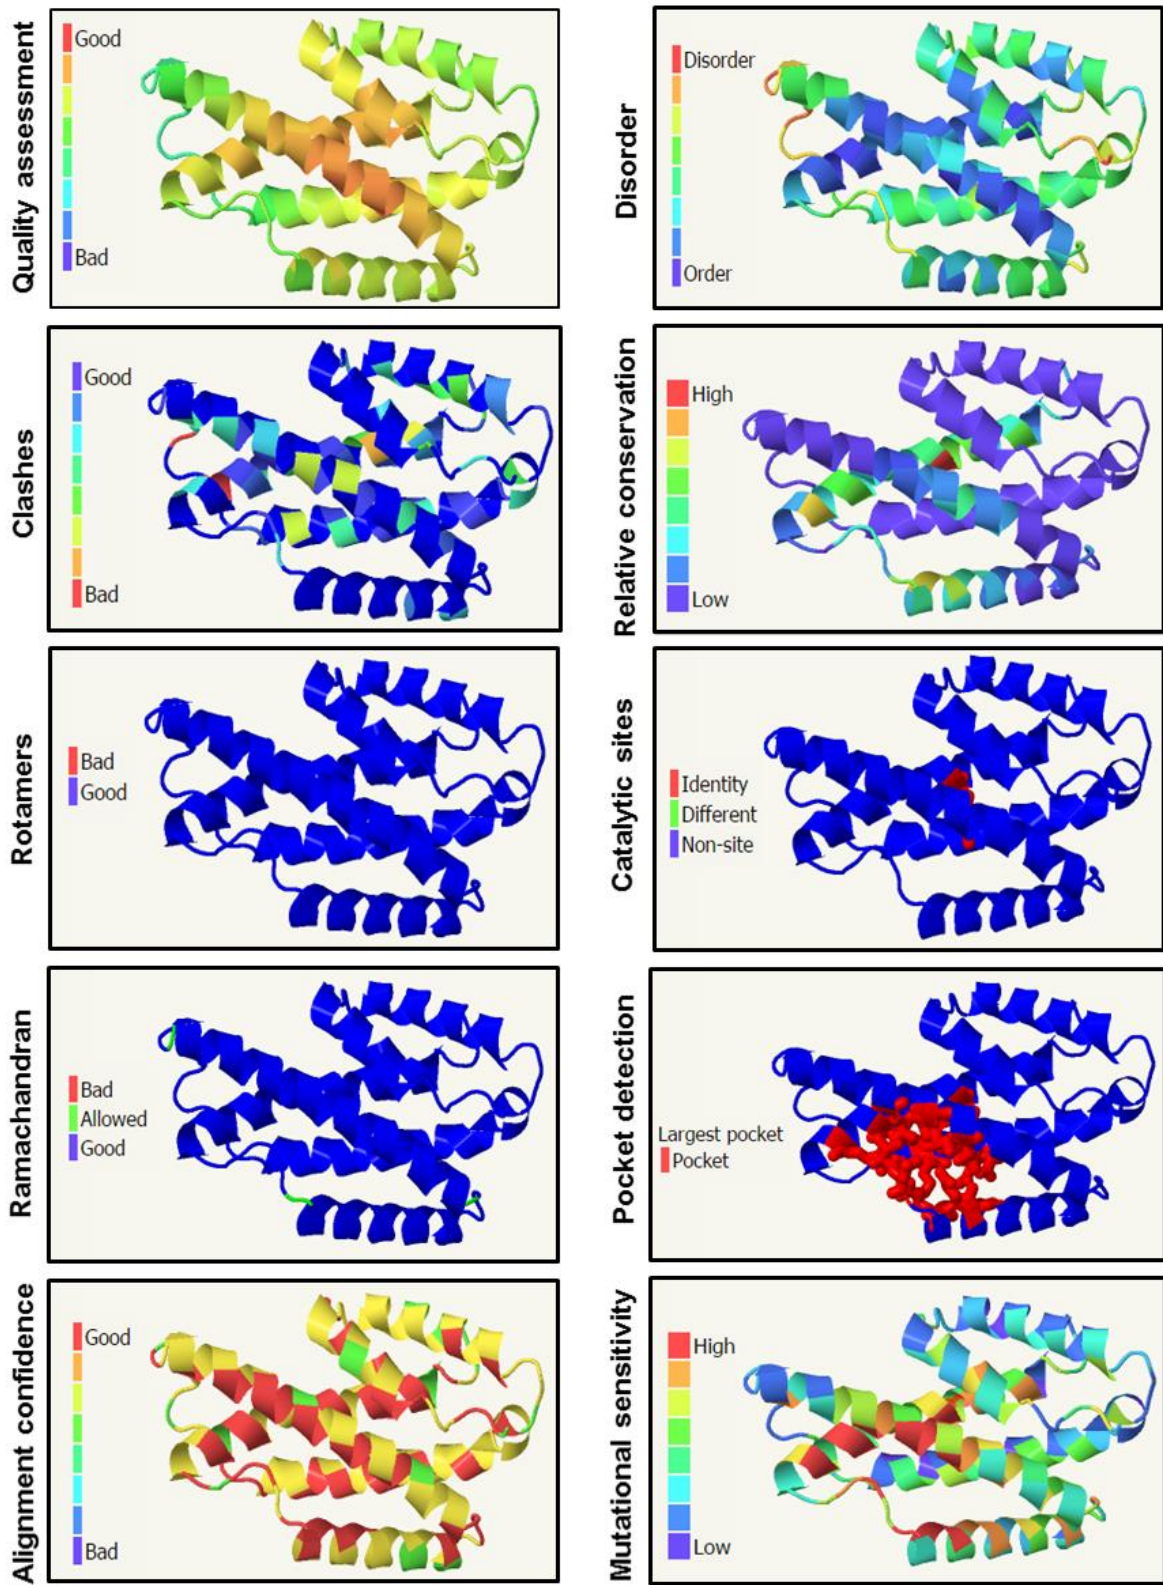

**Fig. S7.** Structural parameters analysis that denotes quality of *CM-sec* protein topology.

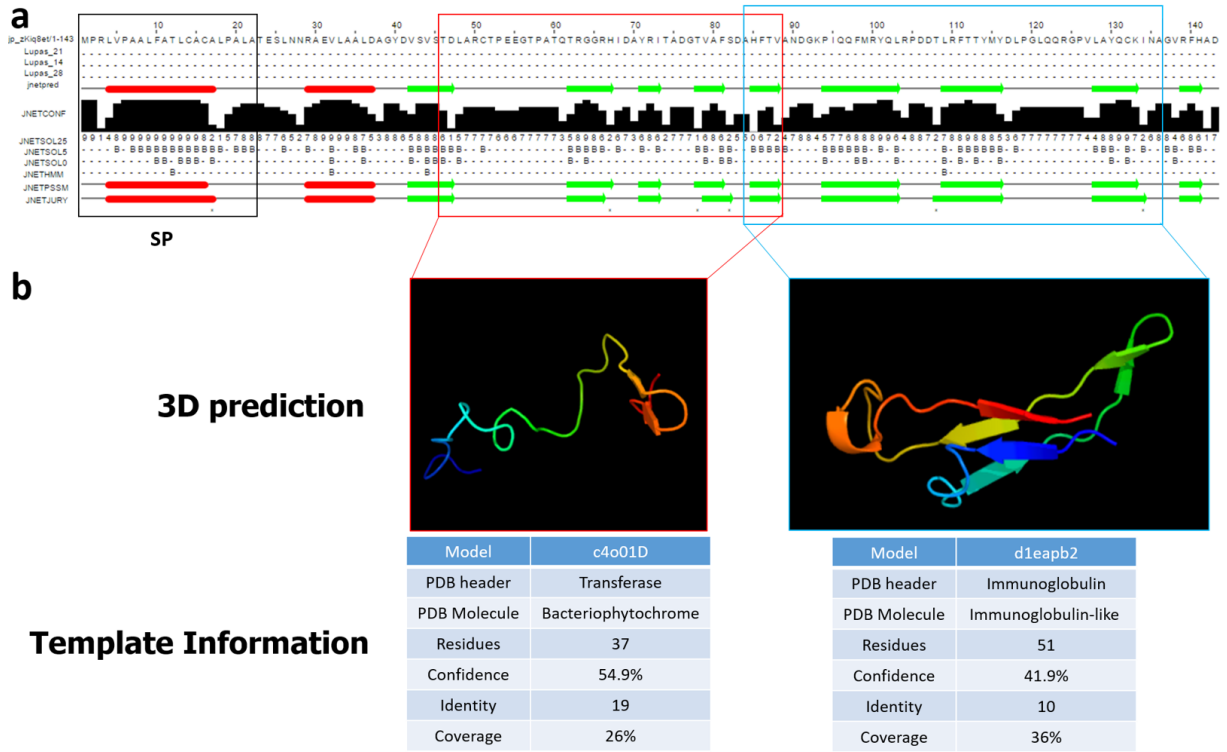

**Fig. S8.** VirK structural analysis.

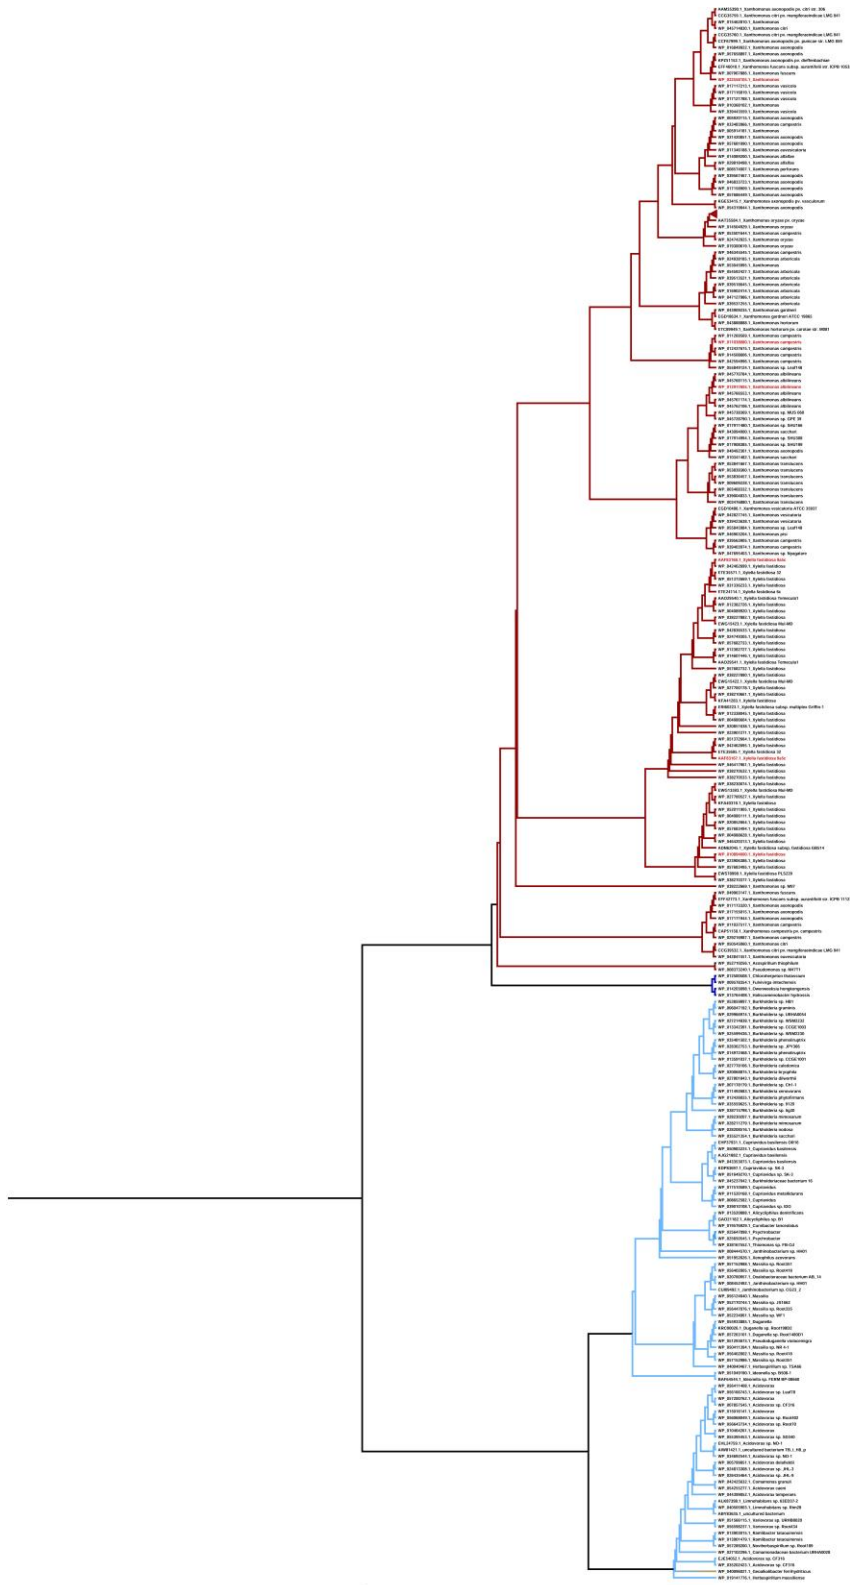

**Fig. S9.** Maximum likelihood phylogenetic tree of LipA.

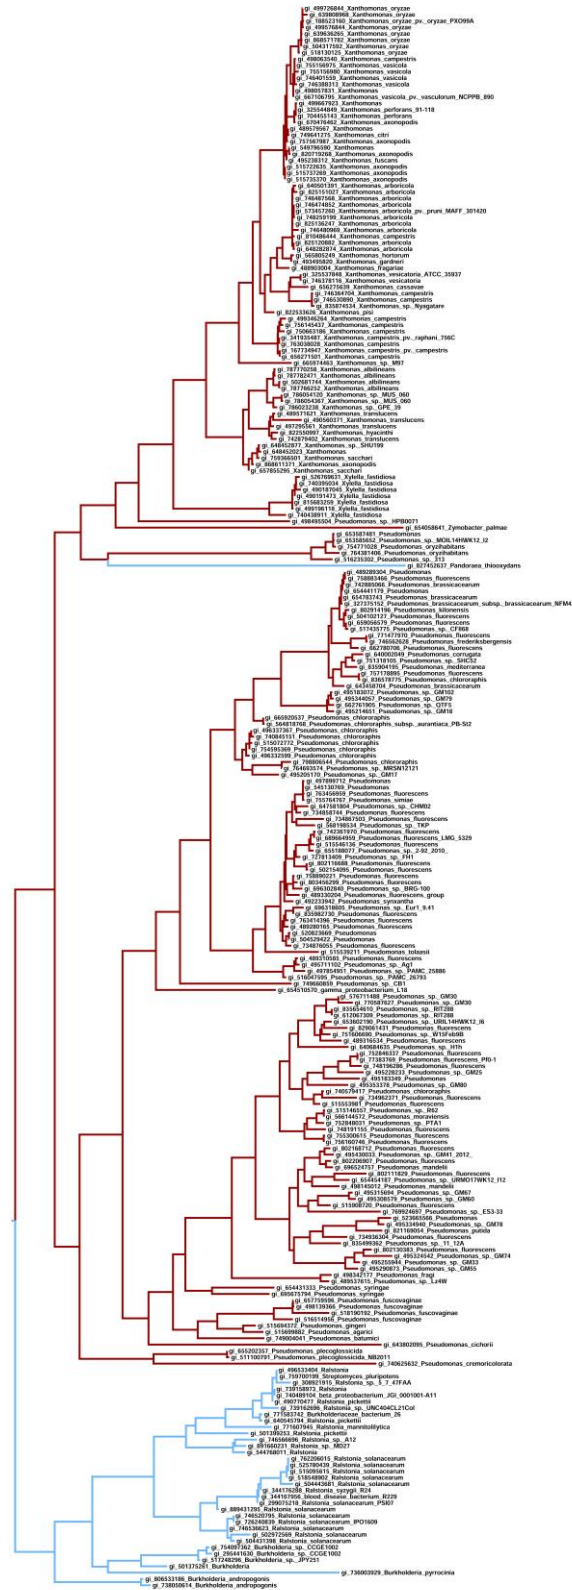

Fig. S10. Maximum likelihood phylogenetic tree of *CM-sec*.

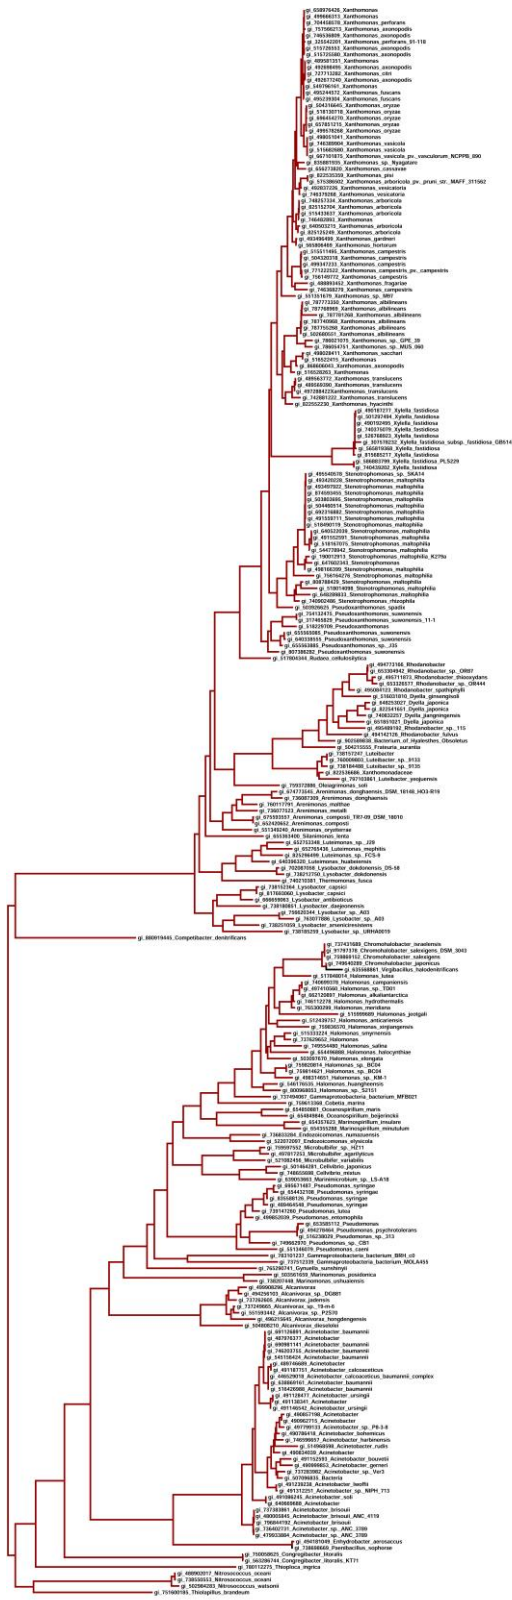

Fig. S11. Maximum likelihood phylogenetic tree of CM-nonsec.

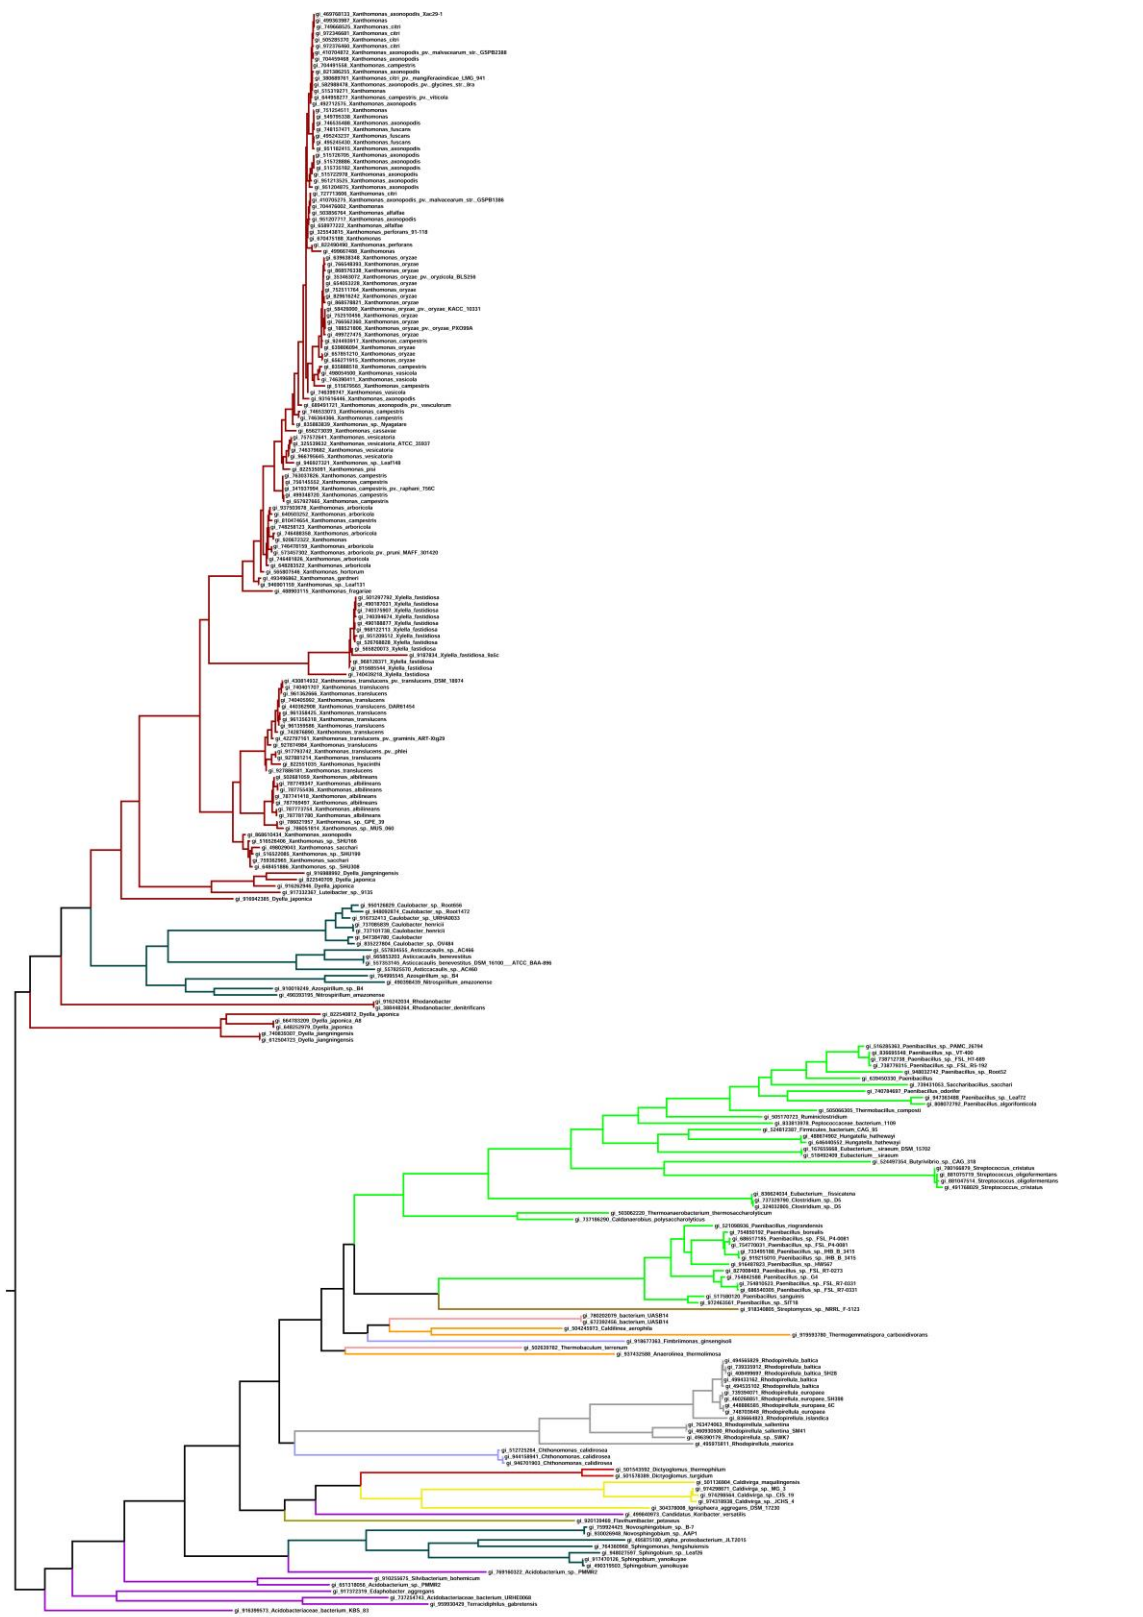

Fig. S12. Maximum likelihood phylogenetic tree of NixE.

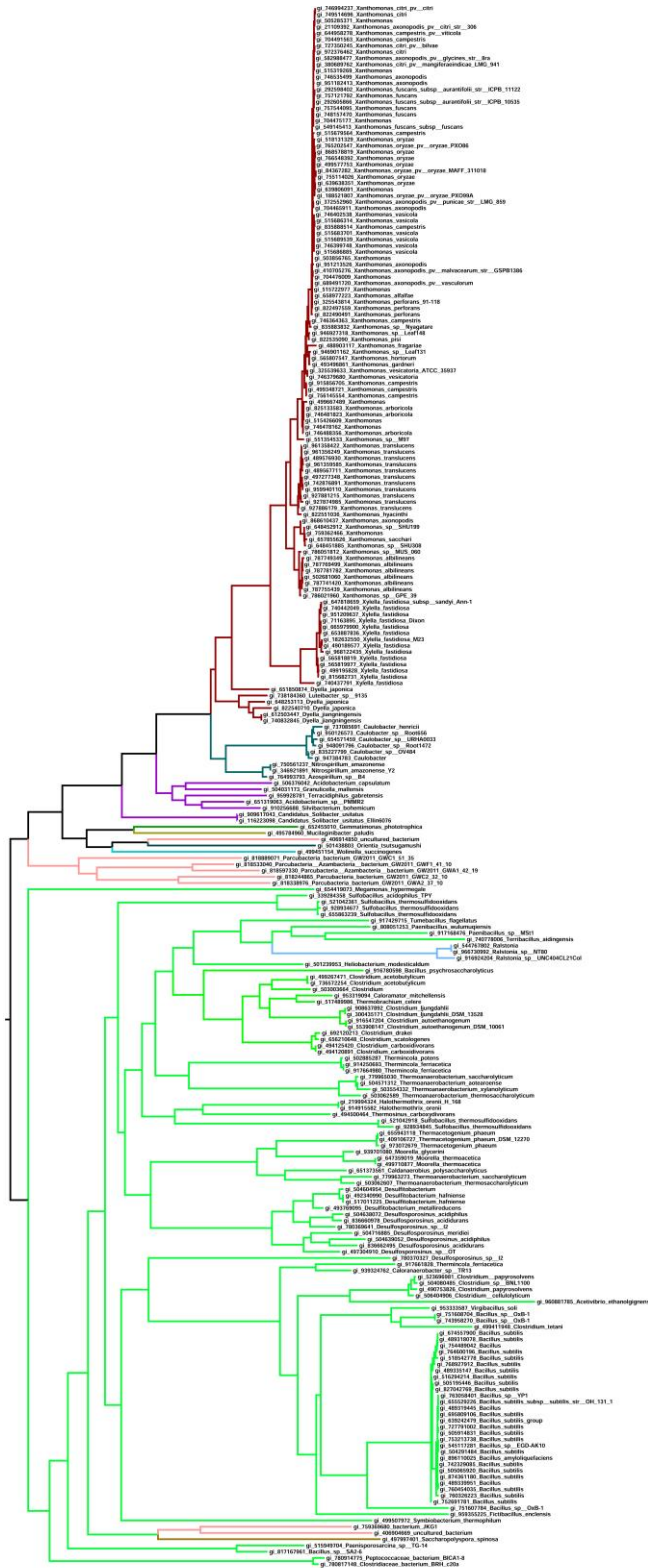

Fig. S13. Maximum likelihood phylogenetic tree of NixF.



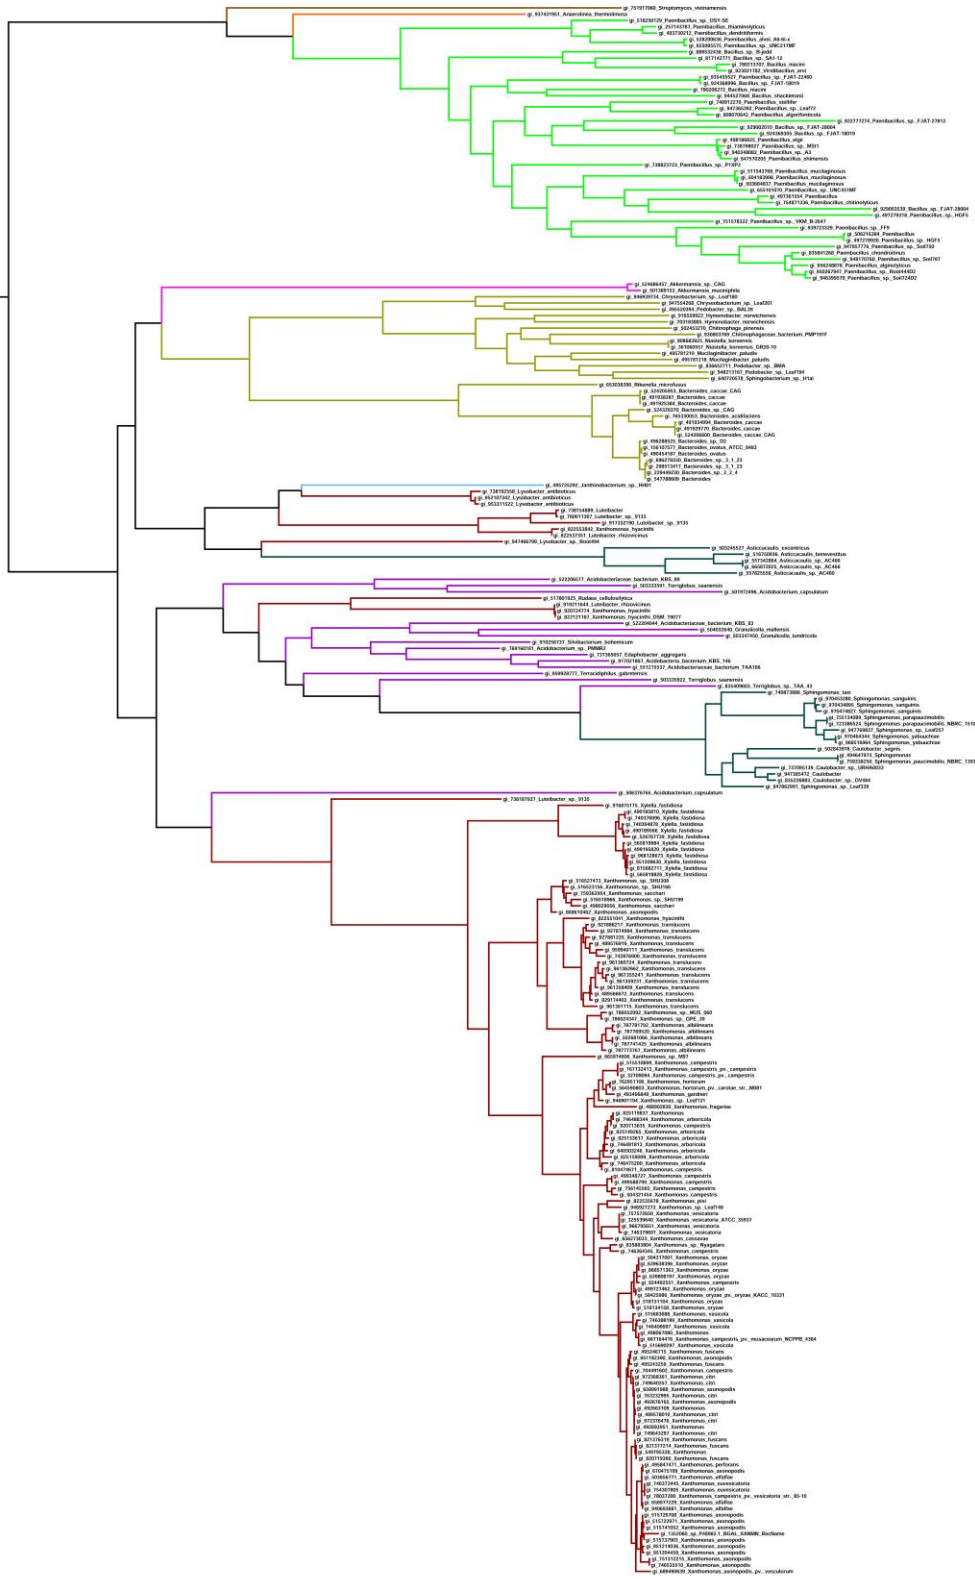

**Fig. S14.** Maximum likelihood phylogenetic tree of NixL.

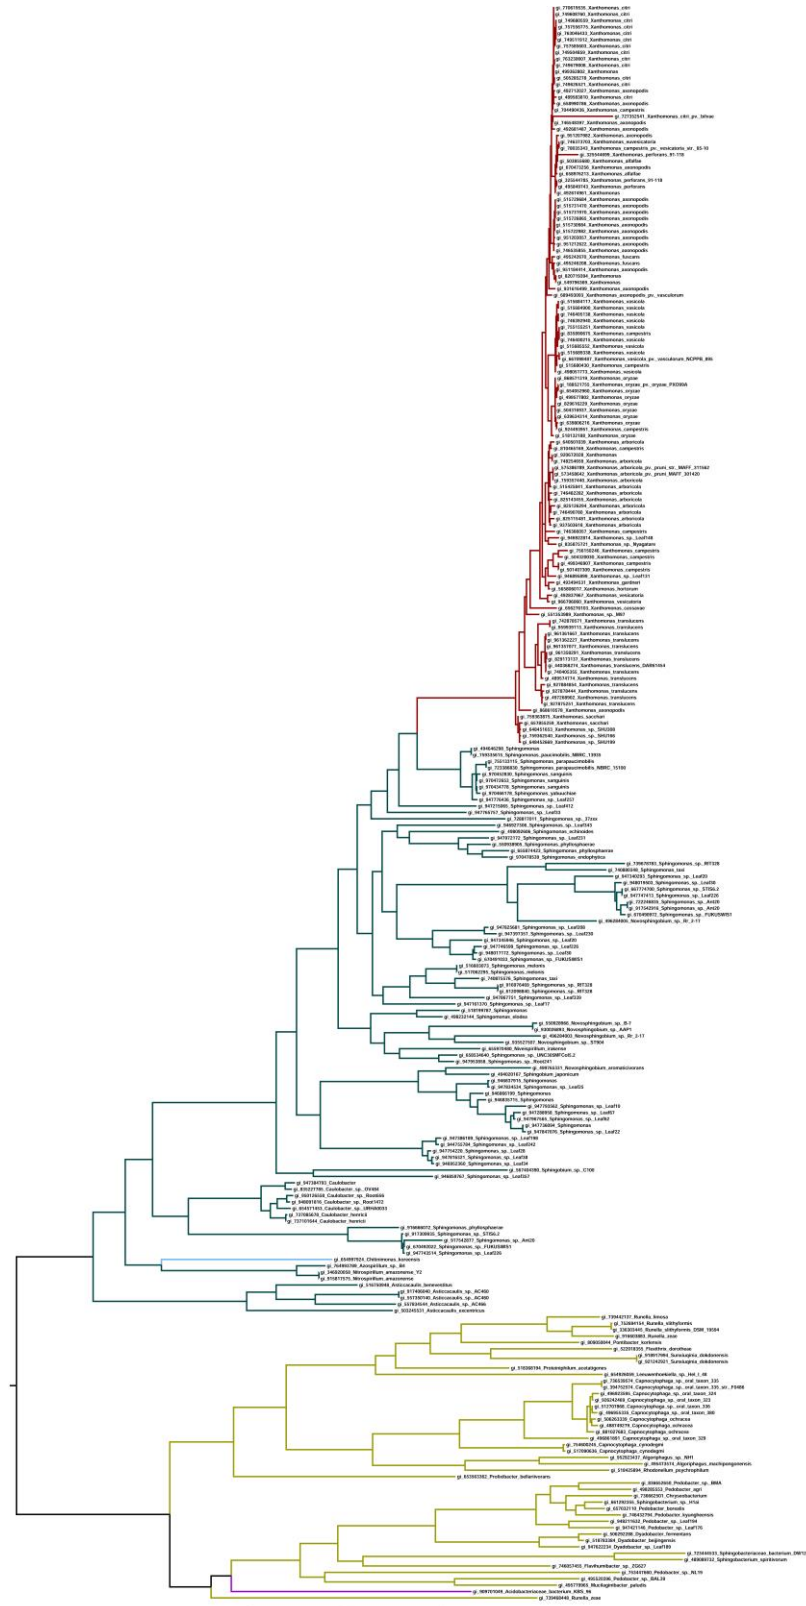

Fig. S15. Maximum likelihood phylogenetic tree of FucA1.

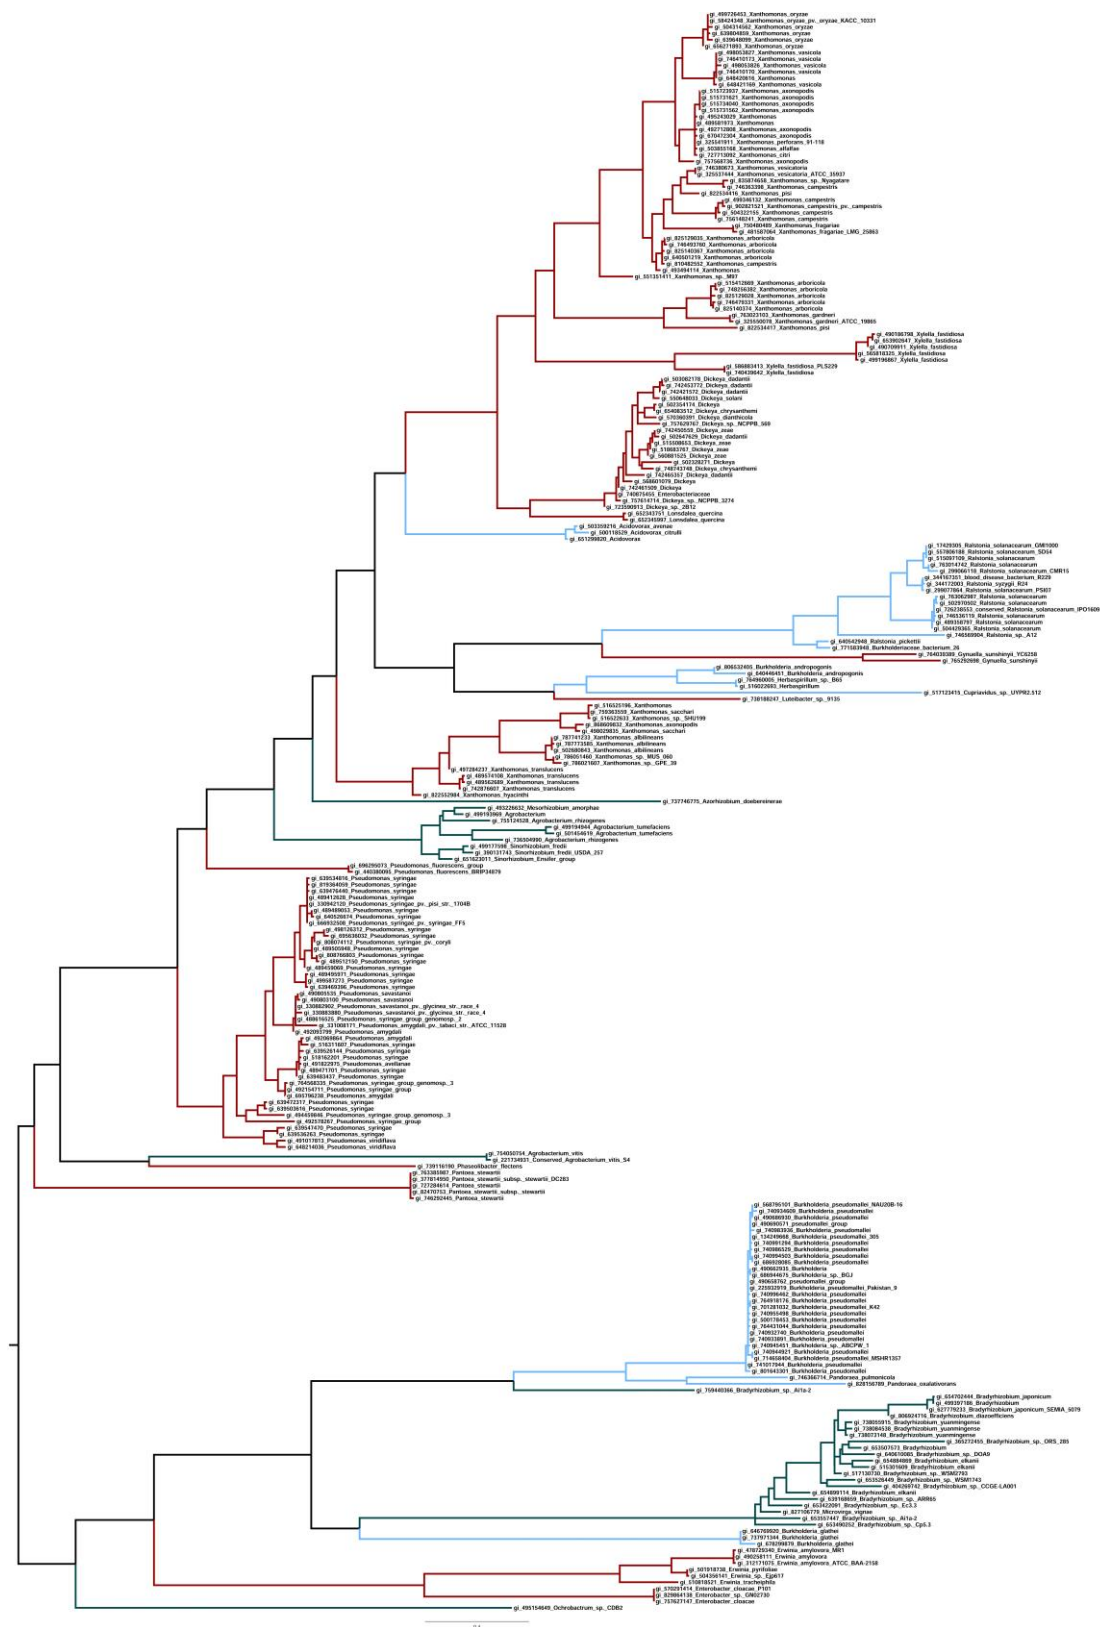

Fig. S16. Maximum likelihood phylogenetic tree of VirK.
